# Supplementary material for: Palladium(II)/Brønsted Acid-Catalyzed Enantioselective Oxidative Carbocyclization–Borylation of Enallenes
Source: PubMed Central journal article supplement (PMC4471548; doi:10.1002/anie.201501048), 2015-03-24
Supplement: anie0054-6024-sd1.pdf [file anie0054-6024-sd1.pdf]

## Supporting Information

German Edition: DOI:

### **Palladium(II)/Brønsted Acid-Catalyzed Enantioselective Oxidative Carbocyclization–Borylation of Enallenes\*\***

*Tuo Jiang, Teresa Bartholomeyzik, Javier Mazuela, Jochen Willersinn, and Jan-E. Bäckvall\**

anie\_201501048\_sm\_miscellaneous\_information.pdf

## General remarks

Unless otherwise noted, all the reactions were run under argon with anhydrous conditions. All reagents were used as received from commercial suppliers. 1,4-Benzoquinone (BQ) was recrystallized from *n*-hexane before use. Phosphorus(V) oxychloride (POCl<sub>3</sub>) was distilled over Na under argon and stored in a desiccator in the fridge. Arene-type solvents were dried over activated 4Å molecular sieves under argon. Room temperature is 23 ± 1 °C. Reactions were monitored using E. Merck silica gel 60 F254 plates (TLC analysis). TLC plates were visualized with UV light (254 nm), iodine, KMnO<sub>4</sub> stain or CAM stain (Cerium Ammonium Molybdate). Flash chromatography was carried out with 60Å (particle size 35-70 μm) normal flash silica gel. NMR spectra were recorded at 400 MHz (H) and at 100 MHz (C), respectively. Chemical shifts (δ) are reported in ppm, using the residual solvent peak in CDCl<sub>3</sub> (H: δ = 7.26 ppm and C: δ = 77.16 ppm) as internal standard, and coupling constants (*J*) are given in Hz. HRMS were recorded using ESI-TOF techniques. The enantiomeric excess of compounds was determined by chiral HPLC using the corresponding racemic compounds as the reference.

## Experimental section

### Starting materials and chiral catalysts

Allenyl bromides were prepared based on the reported protocols.<sup>1</sup> Due to the instability, all allenyl bromides were used immediately after the preparation.

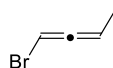

<sup>1</sup>H NMR (CDCl<sub>3</sub>, 400 MHz): δ 5.91 (dq, *J* = 5.7, 2.4 Hz, 1H), 5.34 (dq, *J* = 7.3, 5.7 Hz, 1H), 1.82 (dd, *J* = 7.3, 2.4 Hz, 3H).

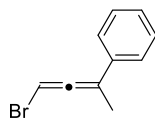

<sup>1</sup>H NMR (CDCl<sub>3</sub>, 400 MHz): δ 7.46 – 7.44 (m, 2H), 7.39 – 7.35 (m, 2H), 7.31 – 7.27 (m, 1H), 6.25 (q, *J* = 2.1 Hz, 1H), 2.25 (d, *J* = 2.1 Hz, 3H).

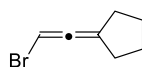

<sup>1</sup>H NMR (CDCl<sub>3</sub>, 400 MHz): δ 5.93 (quintet, *J* = 3.0 Hz, 1H), 2.58 – 2.45 (m, 4H), 1.75 – 1.69 (m, 4H).

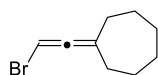

$^1\text{H NMR}$  ( $\text{CDCl}_3$ , 400 MHz):  $\delta$  5.81 (quintet,  $J = 1.8$  Hz, 1H), 2.41 – 2.37 (m, 4H), 1.68 – 1.64 (m, 4H), 1.59 – 1.53 (m, 4H).

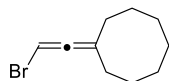

$^1\text{H NMR}$  ( $\text{CDCl}_3$ , 400 MHz):  $\delta$  5.85 (quintet,  $J = 1.6$  Hz, 1H), 2.31 – 2.26 (m, 4H), 1.71 – 1.66 (m, 4H), 1.56 – 1.50 (m, 6H).

Enallenes were prepared according to our previous reports.<sup>2,3</sup> A general procedure is shown below.

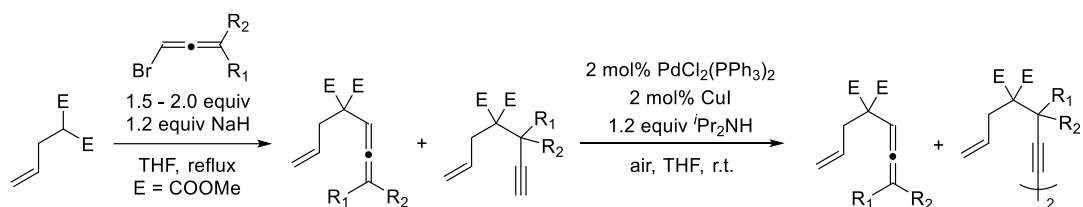

New enallene substrates are listed below.

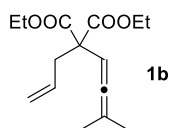

From diethyl allylmalonate (15 mmol), enallene **1b** was obtained as a light yellow oil (1.40 g, 35% for two steps).

$^1\text{H NMR}$  ( $\text{CDCl}_3$ , 400 MHz):  $\delta$  5.71 (ddt,  $J = 17.1, 10.0, 7.1$  Hz, 1H), 5.51 (quintet,  $J = 2.9$  Hz, 1H), 5.10 – 5.03 (m, 2H), 4.22 – 4.14 (m, 4H), 2.73 (dt,  $J = 7.1, 1.1$  Hz, 2H), 1.69 (d,  $J = 2.9$  Hz, 6H), 1.25 (t,  $J = 7.1$  Hz, 6H).

$^{13}\text{C NMR}$  ( $\text{CDCl}_3$ , 100 MHz):  $\delta$  201.9, 170.4 (2C), 133.1, 118.6, 99.9, 88.5, 61.6 (2C), 58.1, 38.9, 20.2 (2C), 14.2 (2C).

HRMS (ESI)  $m/z$  for  $\text{C}_{15}\text{H}_{22}\text{O}_4\text{Na}$  [ $\text{M}+\text{Na}$ ] $^+$  calcd 289.1410, found 289.1399.

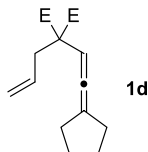

From dimethyl allylmalonate (10 mmol), enallene **1d** was obtained as a light yellow oil (1.27 g, 48% for two steps).

$^1\text{H NMR}$  ( $\text{CDCl}_3$ , 400 MHz):  $\delta$  5.71 (ddt,  $J = 17.1, 10.1, 7.2$  Hz, 1H), 5.57 (quintet,  $J = 4.0$  Hz, 1H), 5.10 – 5.04 (m, 2H), 3.72 (s, 6H), 2.74 (dt,  $J = 7.2, 1.2$  Hz, 2H), 2.39 – 2.34 (m, 4H), 1.69 – 1.65 (m, 4H).

$^{13}\text{C NMR}$  ( $\text{CDCl}_3$ , 100 MHz):  $\delta$  197.5, 170.8 (2C), 133.2, 118.6, 108.7, 90.7, 58.7, 52.7 (2C), 38.9, 31.1 (2C), 27.1 (2C).

HRMS (ESI)  $m/z$  for  $\text{C}_{15}\text{H}_{20}\text{O}_4\text{Na}$  [ $\text{M}+\text{Na}$ ] $^+$  calcd 287.1254, found 287.1256.

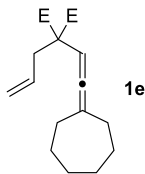

From dimethyl allylmalonate (8.8 mmol), enallene **1e** was obtained as a light yellow oil (1.35 g, 53% for two steps).

$^1\text{H NMR}$  ( $\text{CDCl}_3$ , 400 MHz):  $\delta$  5.73 (ddt,  $J = 17.1, 10.1, 7.2$  Hz, 1H), 5.50 (quintet,  $J = 5.50$  Hz, 1H), 5.11 – 5.04 (m, 2H), 3.72 (s, 6H), 2.75 (dt,  $J = 7.2, 1.2$  Hz, 2H), 2.27 – 2.23 (m, 4H), 1.64 – 1.60 (m, 4H), 1.55 – 1.52 (m, 4H).

$^{13}\text{C NMR}$  ( $\text{CDCl}_3$ , 100 MHz):  $\delta$  201.8, 170.9 (2C), 133.2, 118.6, 109.4, 88.1, 58.5, 52.7 (2C), 39.2, 32.2 (2C), 29.5 (2C), 28.5 (2C).

HRMS (ESI)  $m/z$  for  $\text{C}_{17}\text{H}_{24}\text{O}_4\text{Na}$   $[\text{M}+\text{Na}]^+$  calcd 315.1567, found 315.1571.

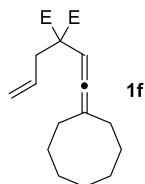

From dimethyl allylmalonate (2.6 mmol), enallene **1f** was obtained as a light yellow oil (455 mg, 57% after two steps).

$^1\text{H NMR}$  ( $\text{CDCl}_3$ , 400 MHz):  $\delta$  5.74 (ddt,  $J = 17.1, 10.1, 7.2$  Hz, 1H), 5.55 (quintet,  $J = 2.2$  Hz, 1H), 5.11 – 5.04 (m, 2H), 3.72 (s, 6H), 2.75 (dt,  $J = 7.2, 1.1$  Hz, 2H), 2.20 – 2.15 (m, 4H), 1.65 – 1.51 (m, 10 H).

$^{13}\text{C NMR}$  ( $\text{CDCl}_3$ , 100 MHz):  $\delta$  202.0, 170.9 (2C), 133.2, 118.6, 109.6, 88.6, 58.4, 52.7 (2C), 39.4, 31.3 (2C), 27.0 (2C), 26.8 (2C), 26.0.

HRMS (ESI)  $m/z$  for  $\text{C}_{18}\text{H}_{26}\text{O}_4\text{Na}$   $[\text{M}+\text{Na}]^+$  calcd 329.1723, found 329.1740.

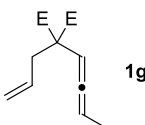

From dimethyl allylmalonate (8 mmol), enallene **1g** was obtained as a light yellow oil (415 mg, 23% for two steps). **Note:** After the homo-coupling reaction, enallene **1g** was further purified by Kugelrohr distillation.

$^1\text{H NMR}$  ( $\text{CDCl}_3$ , 400 MHz):  $\delta$  5.69 (ddt,  $J = 17.1, 10.0, 7.2$  Hz, 1H), 5.59 (dq,  $J = 6.4, 3.2$  Hz, 1H), 5.31 (dq,  $J = 7.1, 6.4$  Hz, 1H), 5.10 – 5.05 (m, 2H), 3.72 (s, 3H), 3.71 (s, 3H), 2.74 (dt,  $J = 7.2, 1.1$  Hz, 2H), 1.66 (dd,  $J = 7.2, 3.2$  Hz, 3H).

$^{13}\text{C NMR}$  ( $\text{CDCl}_3$ , 100 MHz):  $\delta$  204.5, 170.6, 170.5, 132.9, 118.9, 90.3, 89.8, 58.0, 52.8, 52.8, 38.7, 13.9.

HRMS (ESI)  $m/z$  for  $\text{C}_{12}\text{H}_{16}\text{O}_4\text{Na}$   $[\text{M}+\text{Na}]^+$  calcd 247.0941, found 247.0953.

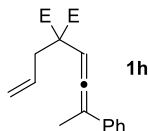

From dimethyl allylmalonate (10 mmol), enallene **1h** was obtained as a light orange oil (1.49 g, 50% for two steps).

$^1\text{H NMR}$  ( $\text{CDCl}_3$ , 400 MHz):  $\delta$  7.39 – 7.37 (m, 2H), 7.33 – 7.30 (m, 2H), 7.22 (m, 1H), 5.97 (q,  $J = 2.9$  Hz, 1H), 5.74 (ddt,  $J = 17.0, 10.1, 7.2$  Hz, 1H), 5.11 – 5.05 (m, 2H), 3.75 (s, 3H), 3.70 (s, 3H), 2.80 (dt,  $J = 7.2, 1.1$  Hz, 1H), 2.11 (d,  $J = 2.9$  Hz, 3H).

$^{13}\text{C NMR}$  ( $\text{CDCl}_3$ , 100 MHz):  $\delta$  204.4, 170.5, 170.5, 136.1, 132.8, 128.5 (2C), 127.3, 126.0 (2C), 119.1, 105.2, 92.6, 58.8, 52.9, 52.8, 39.3, 16.8.

HRMS (ESI)  $m/z$  for  $\text{C}_{18}\text{H}_{20}\text{O}_4\text{Na}$   $[\text{M}+\text{Na}]^+$  calcd 323.1254, found 323.1237.

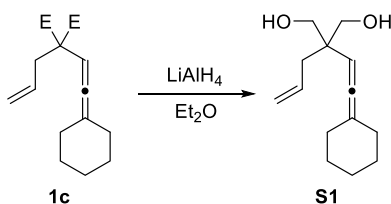

To a suspension of  $\text{LiAlH}_4$  (314 mg, 8.4 mmol) in  $\text{Et}_2\text{O}$  (10 mL) was added a solution of enallene **1a** (769 mg, 2.8 mmol) in  $\text{Et}_2\text{O}$  (10 mL) dropwise followed by vigorous stirring for 2 h at room temperature. The reaction mixture was diluted with  $\text{Et}_2\text{O}$  and quenched carefully with  $\text{Na}_2\text{SO}_4 \cdot 10\text{H}_2\text{O}$ /celite (1:1 mixture). Filtration and concentration gave a residue, which was purified by flash column chromatography (petroleum ether/ $\text{EtOAc}$  4/1) to give **S1** as a colorless oil (454 mg, 73%).

$^1\text{H NMR}$  ( $\text{CDCl}_3$ , 400 MHz):  $\delta$  5.85 (ddt,  $J = 17.1, 10.0, 7.4$  Hz, 1H), 5.14 – 5.07 (m, 2H), 4.85 (quintet,  $J = 2.1$  Hz, 1H), 3.64 (dd,  $J = 11.1, 5.7$  Hz, 2H), 3.59 (dd,  $J = 11.1, 6.8$  Hz, 2H), 2.20 (dt,  $J = 7.4, 1.1$  Hz, 2H), 2.14 – 2.10 (m, 4H), 2.02 (d,  $J = 5.7$  Hz, 1H), 2.00 (d,  $J = 6.8$  Hz, 1H), 1.68 – 1.60 (m, 2H), 1.56 – 1.47 (m, 4H).

$^{13}\text{C NMR}$  ( $\text{CDCl}_3$ , 100 MHz):  $\delta$  198.3, 134.4, 117.9, 105.2, 90.7, 68.1 (2C), 44.9, 38.0, 31.9 (2C), 27.5 (2C), 26.1.

HRMS (ESI)  $m/z$  for  $\text{C}_{14}\text{H}_{22}\text{O}_2\text{Na}$   $[\text{M}+\text{Na}]^+$  calcd 245.1512, found 245.1508.

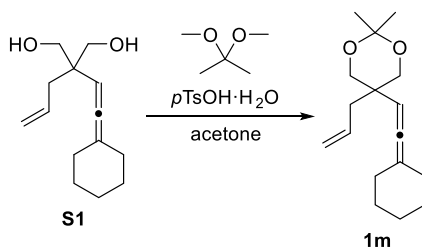

To a solution of **S1** (505 mg, 2.27 mmol) in acetone (11 mL) was added 2,2-dimethoxypropane (0.7 mL, 5.7 mmol) and  $p\text{TsOH} \cdot \text{H}_2\text{O}$  (9 mg, 0.05 mmol). The reaction mixture was stirred at room temperature for 3 h and

quenched with sat. NaHCO<sub>3</sub> (aq.). Acetone was evaporated and the residue was extracted with Et<sub>2</sub>O, washed with brine, dried over MgSO<sub>4</sub>. Concentration gave pure **1m** as a colorless oil (588 mg, 99%).

<sup>1</sup>H NMR (CDCl<sub>3</sub>, 400 MHz): δ 5.81 (ddt, *J* = 17.0, 10.0, 7.4 Hz, 1H), 5.14 – 5.08 (m, 2H), 4.83 (quintet, *J* = 2.0 Hz, 1H), 3.69 (d, *J* = 11.8 Hz, 2H), 3.57 (d, *J* = 11.8 Hz, 2H), 2.36 (dt, *J* = 7.4, 1.1 Hz, 2H), 2.18 – 2.05 (m, 4H), 1.68 – 1.61 (m, 2H), 1.59 – 1.46 (m, 4H), 1.42 (s, 3H), 1.42 (s, 3H).

<sup>13</sup>C NMR (CDCl<sub>3</sub>, 100 MHz): δ 198.3, 134.3, 118.1, 105.2, 97.9, 90.8, 67.8 (2C), 38.3, 37.1, 31.8 (2C), 27.6 (2C), 26.8, 26.2, 21.1.

HRMS (ESI) *m/z* for C<sub>17</sub>H<sub>26</sub>O<sub>2</sub>Na [M+Na]<sup>+</sup> calcd 285.1825, found 285.1814.

C<sub>2</sub>-symmetric chiral phosphoric acids were prepared according to the literature.<sup>4</sup> Biphenol-type chiral phosphoric acids were prepared based on the reported protocol, with further modification.<sup>5,6</sup>

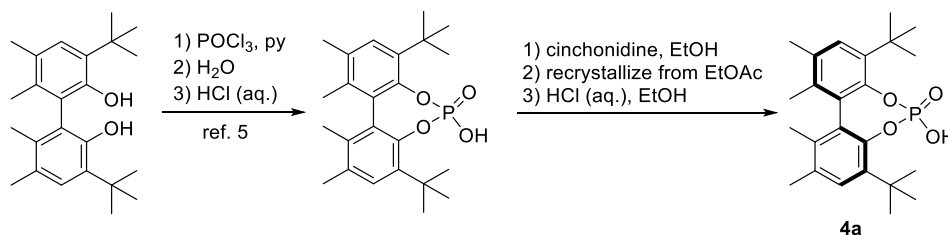

At 80 °C, racemic biphenol phosphoric acid (6.08 g, 14.6 mmol) was dissolved in absolute EtOH (150 mL). (–)-cinchonidine (4.48 g, 96%, 14.6 mmol) was added in one-portion and the mixture was stirred at room temperature for 2 h. Concentration of the reaction mixture gave the crude diastereomers (1:1 ratio), which was used directly for the next step.

The crude diastereomers was dissolved in minimum amount of boiling EtOAc and heated at 80 °C until white solid precipitated. The precipitate was filtered off when hot to give the pure complex of (*S*)-phosphoric acid **4a** & (–)-cinchonidine. The complex was dissolved in absolute EtOH followed by the addition of 50 mL 6N HCl (aq.). The biphasic mixture was stirred vigorously at room temperature for 1 h and white precipitation was filtered off and washed with deionized water. The solid was collected and dried under vacuum to give enantiopure (*S*)-phosphoric acid **4a** as a white powder (2.05 g, 34% based on the racemic biphenol phosphoric acid, theoretical yield = 50%).

<sup>1</sup>H NMR (CDCl<sub>3</sub>, 400 MHz): δ 7.20 (s, 2H), 2.25 (s, 6H), 1.83 (s, 6H), 1.46 (s, 18H).

<sup>13</sup>C NMR (CDCl<sub>3</sub>, 100 MHz): δ 144.7 (d, *J* = 7.0 Hz, 2C), 137.9 (d, *J* = 4.2 Hz, 2C), 135.2 (d, *J* = 1.4 Hz, 2C), 133.7 (d, *J* = 1.8 Hz, 2C), 129.2 (2C), 128.7 (d, *J* = 1.8 Hz, 2C), 35.0 (2C), 31.6 (6C), 20.5 (2C), 16.8 (2C).

<sup>31</sup>P NMR (CDCl<sub>3</sub>, 162 MHz): δ -0.56.

[α]<sub>D</sub><sup>23</sup> = + 122.9 (c = 1.0, CHCl<sub>3</sub>).

HRMS (ESI) *m/z* for C<sub>24</sub>H<sub>32</sub>O<sub>4</sub>P [M-H]<sup>–</sup> calcd 415.2044, found 415.2059.

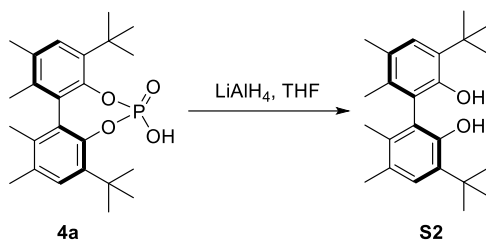

At 0 °C, to a solution of (*S*)-phosphoric acid **4a** (2.05 g, 4.9 mmol) in THF (49 mL) was added LiAlH<sub>4</sub> (651 mg, 17.2 mmol) portionwise followed by reflux for 18 h. The reaction mixture was diluted with THF and quenched carefully with Na<sub>2</sub>SO<sub>4</sub>·10H<sub>2</sub>O/celite (1:1 mixture). Filtration and concentration gave pure (*S*)-biphenol **S2** as a white solid (1.26 g, 73%). Analytical data was in accordance with the literature.<sup>5</sup>

The debutylated biphenol **S3** was prepared from **S2** according to the literature.<sup>7</sup>

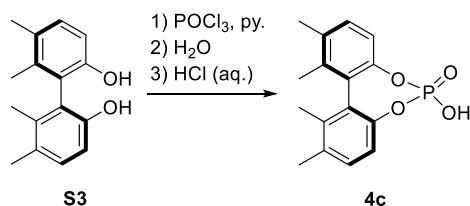

To a solution of (*S*)-biphenol **S3** (469 mg, 1.94 mmol) in pyridine (20 mL) was added POCl<sub>3</sub> (0.36 mL, 3.88 mmol) dropwise. The reaction mixture was heated at reflux for 3 h and cooled to room temperature. Deionized water (5 mL) was added dropwise to the reaction mixture followed by reflux for additional 4 h. Pyridine was removed by rotary evaporation and the residue was dissolved in DCM and acidified with 4N HCl (aq.). The aqueous phase was extracted thoroughly with DCM and the combined organic phase was washed with 4N HCl (aq.), dried over Na<sub>2</sub>SO<sub>4</sub>, and concentrated. The residue was purified by flash column chromatography (DCM/MeOH 5/1 to 2/1) to give a white solid. The white solid was dissolved in DCM, acidified with 4N HCl (aq.) and dried over Na<sub>2</sub>SO<sub>4</sub>. Removal of the solvent gave pure (*S*)-phosphoric acid **4c** as a white powder (412 mg, 70%).

<sup>1</sup>H NMR (CDCl<sub>3</sub>, 400 MHz): δ 7.20 (d, *J* = 8.1 Hz, 2H), 7.09 (d, *J* = 8.1 Hz, 2H), 2.31 (s, 6H), 2.04 (s, 6H).

<sup>13</sup>C NMR (CDCl<sub>3</sub>, 100 MHz): δ 146.7 (d, *J* = 8.6 Hz, 2C), 137.6 (2C), 135.1 (d, *J* = 2.0 Hz, 2C), 130.6 (2C), 127.1 (2C), 118.3 (d, *J* = 3.7 Hz, 2C), 20.4 (2C), 17.7 (2C).

<sup>31</sup>P NMR (CDCl<sub>3</sub>, 162 MHz): δ -3.34.

[α]<sub>D</sub><sup>23</sup> = + 157.0 (c = 0.1, CHCl<sub>3</sub>).

HRMS (ESI) *m/z* for C<sub>16</sub>H<sub>16</sub>O<sub>4</sub>P [M-H]<sup>-</sup> calcd 303.0792, found 303.0795.

The brominated (*S*)-biphenol **S4** was prepared according to the literature.<sup>7</sup>

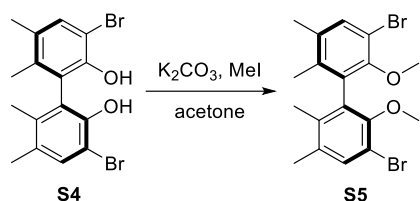

To a solution of **S4** (166 mg, 0.41 mmol) in acetone (5 mL) was added  $K_2CO_3$  (198 mg, 1.44 mmol) and MeI (0.15 mL, 2.46 mmol) and the mixture was heated at reflux for 18 h. Acetone was removed by rotary evaporation and the residue was dissolved with DCM and washed with deionized water. The aqueous phase was extracted thoroughly with DCM and the combined organic phase was washed with brine, dried over  $Na_2SO_4$ , and concentrated. The residue was obtained as a white solid (177 mg, 99%) and used directly for the next step. Analytical data of **S5** was in accordance with the literature.

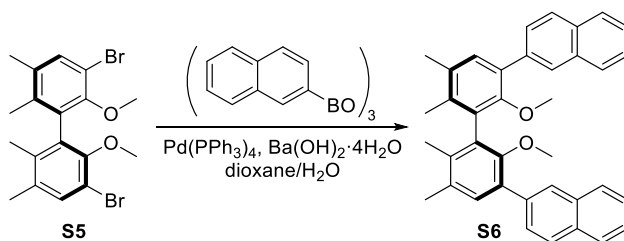

To a mixture of **S5** (177 mg, 0.41 mmol), 2-naphthylboroxine (663 mg, 1.44 mmol),  $Pd(PPh_3)_4$  (47 mg, 0.04 mmol) and  $Ba(OH)_2 \cdot 4H_2O$  (453 mg, 1.44 mmol) was added freshly degassed dioxane/ $H_2O$  (4 mL, 3/1). The reaction mixture was heated at 90 °C for 18 h. Dioxane was removed by rotary evaporation and the residue was dissolved in DCM and washed with 2 N HCl (aq.). The aqueous phase was extracted thoroughly with DCM and the combined organic phase was washed brine, dried over  $Na_2SO_4$ , and concentrated. The residue was purified by flash column chromatography (pentane/DCM 5/1) to give **S6** as a white solid (209 mg, 98 %).

$^1H$  NMR ( $CDCl_3$ , 400 MHz):  $\delta$  8.18 (br. s, 2H), 7.97 – 7.89 (m, 8H), 7.56 – 7.53 (m, 4H), 7.41 (s, 2H), 3.32 (s, 6H), 2.46 (s, 6H), 2.13 (s, 6H).

$^{13}C$  NMR ( $CDCl_3$ , 100 MHz):  $\delta$  153.7, 137.1, 135.9, 133.7, 132.6, 132.5, 132.3, 131.7, 131.5, 128.2, 127.9, 127.7, 127.7, 127.6, 126.0, 125.8, 60.4, 20.3, 17.0.

$[\alpha]_D^{23} = +220.0$  ( $c = 2.0$ ,  $CHCl_3$ ).



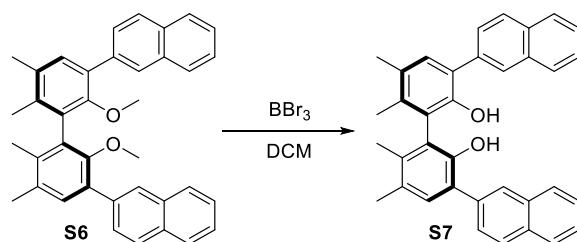

At 0 °C, to a solution of **S6** (209 mg, 0.40 mmol) in DCM (4 mL) was added BBr<sub>3</sub> (0.84 mL, 1.0 M in hexane, 0.84 mmol) dropwise. The reaction was maintained at 0 °C for 3 h and quenched by slow addition of deionized water. The aqueous phase was extracted thoroughly with DCM and the combined organic phase was washed brine, dried over Na<sub>2</sub>SO<sub>4</sub> and passed through a short silica column. Removal of the solvent gave pure **S7** as a white solid (193 mg, 98%).

<sup>1</sup>H NMR (CDCl<sub>3</sub>, 400 MHz): δ 8.07 (br. s, 2H), 7.91 (d, *J* = 8.6 Hz, 2H), 7.89 – 7.85 (m, 4H), 7.76 (dd, *J* = 8.6, 1.8 Hz, 2H), 7.50 – 7.48 (m, 4H), 7.36 (s, 2H), 5.00 (s, 2H), 2.37 (s, 6H), 2.05 (s, 6H).

<sup>13</sup>C NMR (CDCl<sub>3</sub>, 100 MHz): δ 148.8, 136.7, 135.6, 133.7, 132.6, 132.5, 129.6, 128.2, 128.0, 128.0, 127.8 (2C), 126.2, 126.0, 125.7, 121.8, 20.0, 16.7.

[α]<sub>D</sub><sup>23</sup> = + 252.6 (c = 0.8, CHCl<sub>3</sub>).

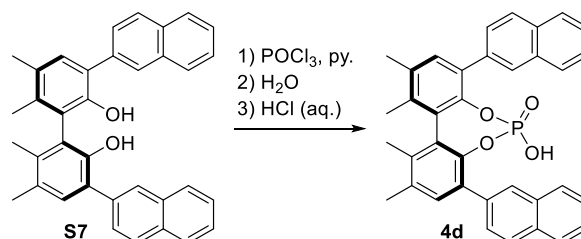

To a solution of **S7** (347 mg, 0.7 mmol) in pyridine (7 mL) was added POCl<sub>3</sub> (0.13 mL, 0.14 mmol) dropwise. The reaction mixture was heated at 90 °C for 18 h and cooled to room temperature. Deionized water (5 mL) was added dropwise to the reaction mixture followed by heating at 90 °C for additional 8 h. Pyridine was removed by rotary evaporation and the residue was dissolved in DCM and acidified with 4N HCl (aq.). The aqueous phase was extracted thoroughly with DCM and the combined organic phase was washed with deionized water, dried over Na<sub>2</sub>SO<sub>4</sub>, and concentrated. The residue was purified by flash column chromatography (DCM/MeOH 20/1) to give a white solid. The white solid was dissolved in DCM, acidified with 4N HCl (aq.) and dried over Na<sub>2</sub>SO<sub>4</sub>. Removal of the solvent gave pure (*S*)-phosphoric acid **4d** as a white powder (367 mg, 94%).

<sup>1</sup>H NMR (CDCl<sub>3</sub>, 400 MHz): δ 7.86 (br. s, 2H), 7.70 – 7.67 (m, 2H), 7.57 – 7.54 (m, 2H), 7.53 – 7.51 (m, 2H), 7.50 – 7.46 (m, 2H), 7.31 (br. s, 2H), 7.26 – 7.24 (m, 4H), 2.40 (s, 6H), 2.14 (s, 6H).

<sup>13</sup>C NMR (CDCl<sub>3</sub>, 100 MHz): δ 143.5 (d, *J* = 9.2 Hz, 2C), 136.9 (2C), 134.7 (2C), 134.5 (2C), 133.3 (2C), 132.6 (2C), 132.2 (2C), 131.6 (d, *J* = 9.2 Hz, 2C), 128.4 (2C), 128.4 (2C), 128.1 (2C), 127.6 (4C), 127.5 (2C), 125.7 (2C), 125.7 (2C), 20.5 (2C), 17.7 (2C).

<sup>31</sup>P NMR (CDCl<sub>3</sub>, 162 MHz): δ 1.17.

[α]<sub>D</sub><sup>23</sup> = + 319.7 (c = 1.77, CHCl<sub>3</sub>).

HRMS (ESI) *m/z* for C<sub>36</sub>H<sub>28</sub>O<sub>4</sub>P [M-H]<sup>-</sup> calcd 555.1731, found 555.1705.

(*S*)-Phosphoramidate **4e** was prepared based on the literature protocol.<sup>8</sup>

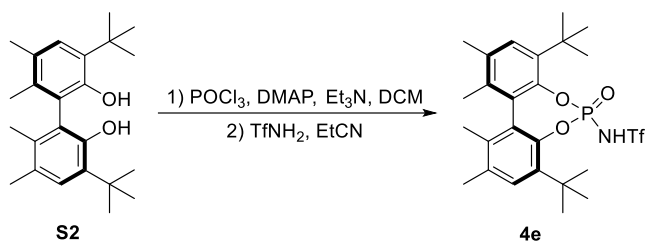

At 0 °C, to a solution of **S2** (213 mg, 0.6 mmol) in DCM (3 mL) were added Et<sub>3</sub>N (0.59 mL, 4.2 mmol), POCl<sub>3</sub> (67 μL, 0.72 mmol) and DMAP (147 mg, 1.2 mmol) at 0 °C. After stirring at room temperature for 1 h, EtCN (3 mL) was added followed by the addition of TfNH<sub>2</sub> (179 mg, 1.2 mmol). Then the reaction was heated 100 °C for 16 h. The reaction was quenched with deionized water, and extracted with Et<sub>2</sub>O. The combined organic phase was washed with sat. NaHCO<sub>3</sub> (aq.), 4N HCl (aq.), dried over Na<sub>2</sub>SO<sub>4</sub> and concentrated. The residue was purified by flash column chromatography (100% Et<sub>2</sub>O) to give a pale white solid. The solid was dissolved in DCM, acidified with 4N HCl (aq.) and dried over Na<sub>2</sub>SO<sub>4</sub>. Removal of the solvent gave (*S*)-phosphoramidate **4e** as a white powder (276 mg, 84%).

<sup>1</sup>H NMR (CDCl<sub>3</sub>, 400 MHz): δ 7.23 (s, 1H), 7.22 (s, 1H), 2.26 (s, 6H), 1.84 (s, 3H), 1.79 (s, 3H), 1.47 (s, 9H), 1.44 (s, 9H).

<sup>13</sup>C NMR (CDCl<sub>3</sub>, 100 MHz): δ 144.0 (d, *J* = 10.5 Hz, 1C), 143.6 (d, *J* = 9.1 Hz, 1C), 138.3 (d, *J* = 4.3 Hz, 1C), 137.3 (d, *J* = 4.9 Hz, 1C), 135.8, 135.7, 134.6 (d, *J* = 1.5 Hz, 1C), 134.4 (d, *J* = 1.5 Hz, 1C), 129.4 (2C), 128.5, 128.3, 119.3 (q, *J* = 321.2 Hz, 1C), 119.3 (q, *J* = 321.2 Hz, 1C), 35.1, 34.8, 31.8 (3C), 31.3 (3C), 20.6, 20.5, 16.8, 16.7.

<sup>31</sup>P NMR (CDCl<sub>3</sub>, 162 MHz): δ -9.05.

[α]<sub>D</sub><sup>23</sup> = + 122.9 (c = 1.0, CHCl<sub>3</sub>).

HRMS (ESI) *m/z* for C<sub>25</sub>H<sub>32</sub>O<sub>5</sub>F<sub>3</sub>NPS [M-H]<sup>-</sup> calcd 546.1696, found 546.1721.

## Optimization of the reaction parameters.

### Initial screening of solvents.<sup>a</sup>

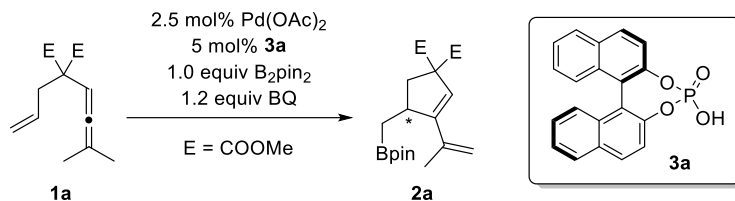

| Entry | Solvent <sup>b</sup> | Time (h) | Yield (%) <sup>c</sup> | ee (%) <sup>d</sup> |
|-------|----------------------|----------|------------------------|---------------------|
| 1     | toluene              | 24       | > 95                   | 30                  |
| 2     | acetone              | 70       | 75                     | 8                   |
| 3     | DCE                  | 70       | 76                     | 8                   |
| 4     | DCM                  | 70       | 70                     | 8                   |
| 5     | EtOAc                | 70       | 85                     | 10                  |
| 6     | THF                  | 70       | 34                     | 6                   |
| 7     | MeCN                 | 70       | 0                      | — <sup>e</sup>      |
| 8     | DMF                  | 70       | 6                      | — <sup>e</sup>      |

(a) Reaction scale: Enallene **1a** (0.1 mmol) in the indicated solvent (1.0 mL) at room temperature. (b) Regular solvent. (c) Determined by <sup>1</sup>H NMR analysis of the crude mixture with anisole as the internal standard. (d) Determined by chiral HPLC. (e) Not determined.

### Screening of different (R)-BINOL phosphoric acids.<sup>a</sup>

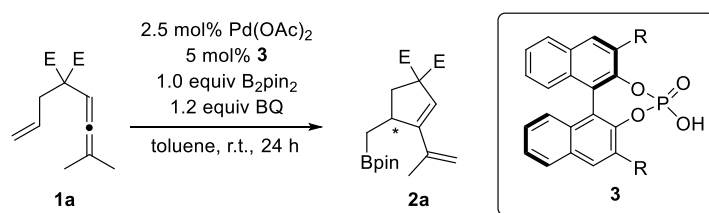

| Entry          | R                                                                    | Yield (%) <sup>b</sup> | ee (%) <sup>c</sup> |
|----------------|----------------------------------------------------------------------|------------------------|---------------------|
| 1              | H, <b>3a</b>                                                         | > 95                   | 30                  |
| 2              | Ph, <b>3b</b>                                                        | > 95                   | 8                   |
| 3              | 2-naphthyl, <b>3c</b>                                                | > 95                   | 45                  |
| 4              | 9-anthracenyl, <b>3d</b>                                             | 67                     | 6                   |
| 5              | TMS, <b>3e</b>                                                       | > 95                   | 42                  |
| 6              | SiPh <sub>3</sub> , <b>3f</b>                                        | > 95                   | 10                  |
| 7              | Si <sup>t</sup> BuPh <sub>2</sub> , <b>3g</b>                        | > 95                   | 26                  |
| 8              | mesityl, <b>3h</b>                                                   | > 95                   | 20                  |
| 9 <sup>d</sup> | 2,4,6-tri- <sup>i</sup> Pr-C <sub>6</sub> H <sub>2</sub> , <b>3i</b> | 67                     | 24                  |
| 10             | Me, <b>3j</b>                                                        | > 95                   | 18                  |
| 11             | allyl, <b>3k</b>                                                     | > 95                   | 45                  |
| 12             | CO <sup>t</sup> Bu, <b>3l</b>                                        | > 95                   | 24                  |
| 13             | 3,5-di-CF <sub>3</sub> -C <sub>6</sub> H <sub>3</sub> , <b>3m</b>    | > 95                   | 2                   |
| 14             | 3,5-di- <sup>t</sup> Bu-C <sub>6</sub> H <sub>3</sub> , <b>3n</b>    | > 95                   | 8                   |

(a) Reaction scale: Enallene **1a** (0.1 mmol) in regular toluene (1.0 mL) at room temperature. (b) Determined by  $^1\text{H}$  NMR analysis of the crude mixture with anisole as the internal standard. (c) Determined by chiral HPLC. (d) Reaction time is 16 h.

### Screening of phosphoric acids with different backbones.<sup>a</sup>

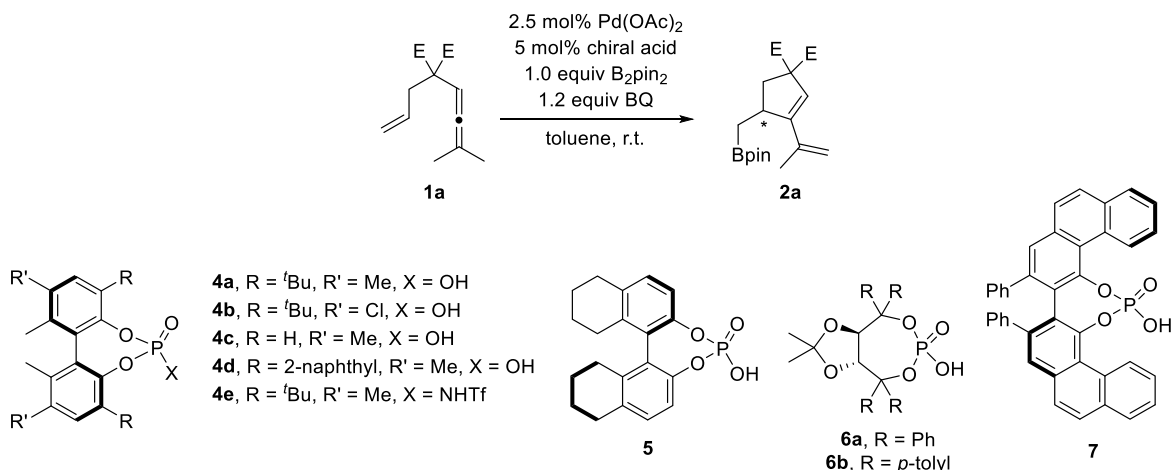

| Entry          | Chiral phosphoric acid | Time (h) | Yield (%) <sup>b</sup> | <i>ee</i> (%) <sup>c</sup> |
|----------------|------------------------|----------|------------------------|----------------------------|
| 1              | <b>4a</b>              | 24       | > 95                   | 77                         |
| 2              | <b>4b</b>              | 16       | 67                     | 76                         |
| 3              | <b>4c</b>              | 16       | > 95                   | 40                         |
| 4              | <b>4d</b>              | 16       | > 95                   | 48                         |
| 5              | <b>4e</b>              | 48       | < 5                    | — <sup>d</sup>             |
| 6              | <b>5</b>               | 16       | > 95                   | 30                         |
| 7              | <b>6a</b>              | 40       | 68                     | 20                         |
| 8              | <b>6b</b>              | 94       | 22                     | 19                         |
| 9 <sup>d</sup> | <b>7</b>               | 60       | 70                     | 40                         |

(a) Reaction scale: Enallene **1a** (0.1 mmol) in regular toluene (1.0 mL) at room temperature. (b) Determined by  $^1\text{H}$  NMR analysis of the crude mixture with anisole as the internal standard. (c) Determined by chiral HPLC. (d) Not determined.

### Screening of different palladium salts.<sup>a</sup>

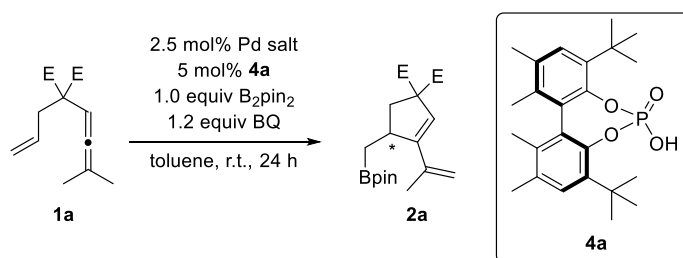

| Entry          | Pd salt                                       | Yield (%) <sup>b</sup> | <i>ee</i> (%) <sup>c</sup> |
|----------------|-----------------------------------------------|------------------------|----------------------------|
| 1 <sup>d</sup> | $\text{Pd}_2\text{dba}_3$                     | 14                     | 70                         |
| 2 <sup>d</sup> | $\text{Pd}_2\text{dba}_3 \cdot \text{CHCl}_3$ | 23                     | 70                         |
| 3              | $\text{Pd}(\text{PPh}_3)_4$                   | 48                     | 47                         |

|                 |                                                    |      |                |
|-----------------|----------------------------------------------------|------|----------------|
| 4               | Pd/C                                               | 0    | – <sup>e</sup> |
| 5               | PdCl <sub>2</sub>                                  | 0    | – <sup>e</sup> |
| 6               | PdCl <sub>2</sub> (PPh <sub>3</sub> ) <sub>2</sub> | 0    | – <sup>e</sup> |
| 7               | PdCl <sub>2</sub> (PhCN) <sub>2</sub>              | 0    | – <sup>e</sup> |
| 8               | PdCl <sub>2</sub> (DMSO) <sub>2</sub>              | 0    | – <sup>e</sup> |
| 9               | PdBr <sub>2</sub>                                  | 0    | – <sup>e</sup> |
| 10              | Pd(OAc) <sub>2</sub>                               | > 95 | 77             |
| 11 <sup>f</sup> | Pd(OAc) <sub>2</sub>                               | > 95 | 79             |
| 12 <sup>f</sup> | Pd(OOCCF <sub>3</sub> ) <sub>2</sub>               | > 95 | 44             |

(a) Reaction scale: Enallene **1a** (0.1 mmol) in regular toluene (1.0 mL) at room temperature. (b) Determined by <sup>1</sup>H NMR analysis of the crude mixture with anisole as the internal standard. (c) Determined by chiral HPLC. (d) With 1.25 mol% of the Pd salt. (e) Not determined. (f) In anhydrous toluene under argon for 48 h.

### Screening of arene-type solvents under inert & anhydrous conditions.<sup>a,b</sup>

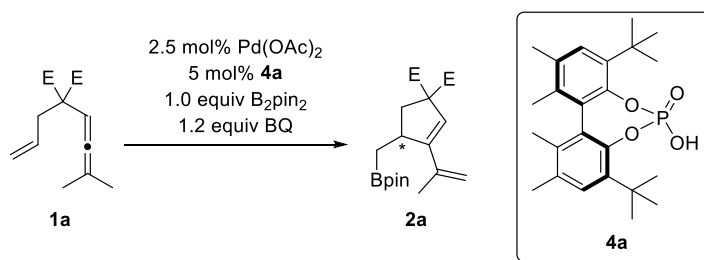

| Entry             | Solvent           | Temp (°C) | Time (h) | Yield (%) <sup>c,d</sup> | ee (%) <sup>e</sup> |
|-------------------|-------------------|-----------|----------|--------------------------|---------------------|
| 1                 | toluene           | r.t.      | 48       | > 95                     | 79                  |
| 2                 | toluene           | 13        | 84       | 71                       | 80                  |
| 3                 | benzene           | 13        | 84       | 85                       | 73                  |
| 4                 | PhCF <sub>3</sub> | 13        | 84       | > 95                     | 80                  |
| 5                 | PhCl              | 13        | 60       | > 95                     | 73                  |
| 6                 | <i>o</i> -xylene  | 13        | 84       | > 95                     | 79                  |
| 7                 | <i>m</i> -xylene  | 13        | 84       | 85                       | 80                  |
| 8                 | <i>p</i> -xylene  | 13        | 84       | 85                       | 77                  |
| 9 <sup>f</sup>    | toluene           | 13        | 84       | > 95                     | 80                  |
| 10 <sup>f</sup>   | PhCF <sub>3</sub> | 13        | 60       | > 95                     | 81                  |
| 11 <sup>f</sup>   | <i>m</i> -xylene  | 13        | 84       | > 95                     | 83                  |
| 12 <sup>g</sup>   | <i>m</i> -xylene  | 13        | 60       | > 95                     | 83                  |
| 13 <sup>f,h</sup> | <i>m</i> -xylene  | 13        | 36       | > 95                     | 83                  |
| 14 <sup>f,h</sup> | <i>m</i> -xylene  | 3         | 66       | > 95                     | 83                  |
| 15 <sup>g,h</sup> | <i>m</i> -xylene  | 3         | 48       | > 95                     | 83                  |

(a) Reaction scale: Enallene **1a** (0.1 mmol) in the indicated solvent (1.0 mL). (b) In anhydrous solvent under argon. (c) Determined by <sup>1</sup>H NMR analysis of the crude mixture with anisole as the internal standard. (d) Isolated yield in parenthesis. (e) Determined by chiral HPLC. (f) Using Pd(OAc)<sub>2</sub> (5 mol%) and **4a** (10 mol%). (g) Using Pd(OAc)<sub>2</sub> (10 mol%) and **4a** (20 mol%). (h) In 0.5 mL of *m*-xylene.

## Screening of benzoquinone-type oxidants.<sup>a</sup>

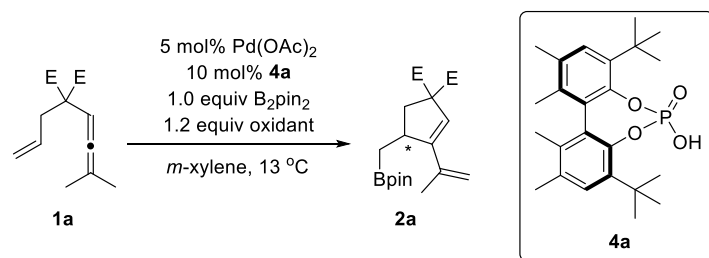

| Entry            | Oxidant                    | Time (h) | Yield (%) <sup>b,c</sup> | ee (%) <sup>d</sup> |
|------------------|----------------------------|----------|--------------------------|---------------------|
| 1                | BQ                         | 36       | > 95                     | 83                  |
| 2                | tetra-F-BQ                 | 60       | 40                       | 58                  |
| 3                | 2,6-di-Me-BQ               | 36       | > 95                     | 76                  |
| 4                | 2,6-di-OMe-BQ              | 60       | > 95                     | 78                  |
| 5                | 2-Cl-BQ                    | 60       | 80                       | 34                  |
| 6                | 2,6-di- <sup>t</sup> Bu-BQ | 60       | 47                       | 80                  |
| 7 <sup>e</sup>   | BQ                         | 36       | > 95                     | 81                  |
| 8 <sup>f</sup>   | BQ                         | 36       | > 95 (93)                | 83                  |
| 8 <sup>f,g</sup> | BQ                         | 42       | 97 (93)                  | 84                  |
| 9 <sup>f,h</sup> | BQ                         | 48       | 94 (88)                  | 84                  |

(a) Reaction scale: Enallene **1a** (0.1 mmol) in anhydrous *m*-xylene solvent (0.5 mL) under argon. (b) Determined by <sup>1</sup>H NMR analysis of the crude mixture with anisole as the internal standard. (c) Isolated yield in parenthesis. (d) Determined by chiral HPLC. (e) Using BQ (1.0 equiv.). (f) With enallene **1a** (0.2 mmol) in anhydrous *m*-xylene solvent (1.0 mL) under argon. (g) Using BQ (1.5 equiv.). (h) Using BQ (1.8 equiv.).

General procedure for the Pd(II)/Brønsted acid-catalyzed enantioselective oxidative carbocyclization-borylation of enallenes

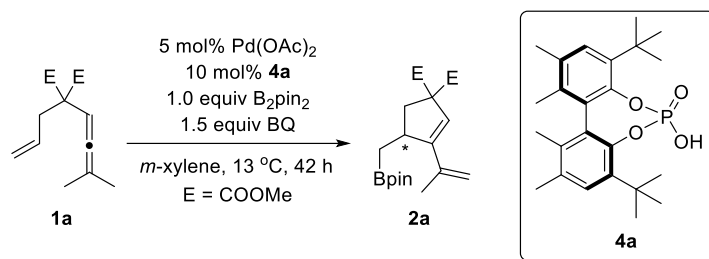

In a microwave vial was charged enallene **1a** (47.6 mg, 0.2 mmol), Pd(OAc)<sub>2</sub> (2.2 mg, 5 mol%), (*S*)-phosphoric acid **4a** (8.3 mg, 10 mol%), B<sub>2</sub>pin<sub>2</sub> (51.8 mg, 98%, 0.2 mmol), BQ (32.4 mg, 0.3 mmol) and *m*-xylene (1 mL). The vial was sealed with a rubber cap and maintained at 13 °C for 42 h. The reaction was quenched with sat. Na<sub>2</sub>S<sub>2</sub>O<sub>3</sub> (aq.) and extracted with Et<sub>2</sub>O. The combined organic phase was washed with brine, dried over Na<sub>2</sub>SO<sub>4</sub> and concentrated. The residue was purified by flash column chromatography (pentane/Et<sub>2</sub>O, 10/1) to afford **2a** (68 mg, 93%). *ee* = 84%.

Spectral data was in accordance with the literature.<sup>9</sup>

**NOTE:** The carbon adjacent to boron may not have a visible peak in <sup>13</sup>C spectrum. However, HSQC experiments can clearly indicate the signals of those carbons.

Retention time: 31.5 & 37.4 min, CHIRALCEL®-ID, *iso*-hexane/*iso*-propanol = 99/1, 25 °C, 0.3 mL/min.

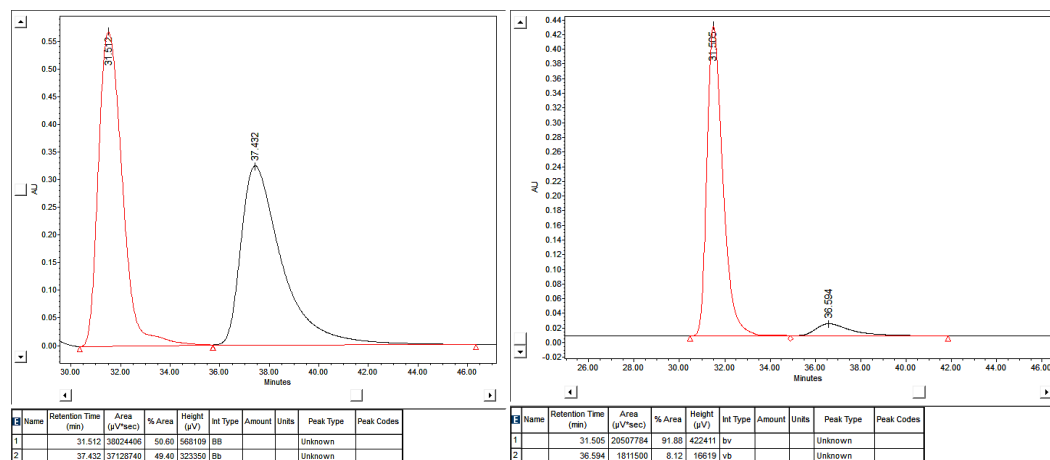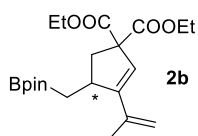

Reaction time: 42 h. Isolated yield: 69 mg (88%). *ee* = 84%.

<sup>1</sup>H NMR (CDCl<sub>3</sub>, 400 MHz): δ 5.66 (s, 1H), 5.02 (br. s, 1H), 5.00 (br. s, 1H), 4.22 – 4.12 (m, 4H), 3.17 (m, 1H), 2.70 (dd, *J* = 13.8, 8.7 Hz, 1H), 2.25 (dd, *J* = 13.8, 3.0 Hz, 1H), 1.90 (br. s, 3H), 1.24 – 1.21 (m, 1H), 1.23 (t, *J* = 7.1 Hz, 6H), 1.23 (br. s, 6H), 1.22 (br. s, 6H), 0.75 (dd, *J* = 16.1, 11.6 Hz, 1H).

$^{13}\text{C}$  NMR ( $\text{CDCl}_3$ , 100 MHz):  $\delta$  171.9, 171.6, 153.7, 138.0, 123.2, 115.3, 83.2 (2C), 65.7, 61.6, 61.5, 40.0, 39.6, 25.0 (2C), 24.8 (2C), 21.4, 18.1 (C-B), 14.1 (2C).

HRMS (ESI)  $m/z$  for  $\text{C}_{21}\text{H}_{33}\text{O}_6\text{BNa}$   $[\text{M}+\text{Na}]^+$  calcd 415.2266, found 415.2246.

Retention time: 27.2 & 31.5 min, CHIRALCEL®-ID, *iso*-hexane/*iso*-propanol = 99/1, 25 °C, 0.3 mL/min.

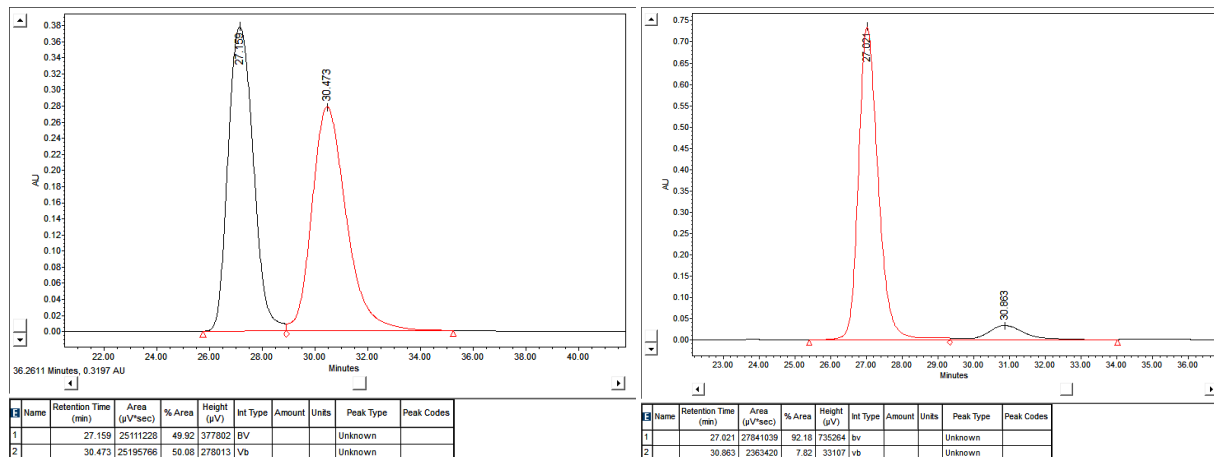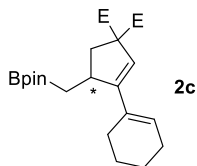

Reaction time: 84 h. Isolated yield: 64 mg (79%). *ee* = 93%.

$^1\text{H}$  NMR ( $\text{CDCl}_3$ , 400 MHz):  $\delta$  5.82 (m, 1H), 5.55 (s, 1H), 3.71 (s, 3H), 3.70 (s, 3H), 3.17 (m, 1H), 2.68 (dd,  $J$  = 13.8, 6.9 Hz, 1H), 2.27 (dd,  $J$  = 13.8, 2.9 Hz, 2H), 2.12 (m, 3H), 1.66 (m, 3H), 1.57 (m, 2H), 1.24 (s, 6H), 1.24 (s, 6H), 0.72 (dd,  $J$  = 16.1, 11.8 Hz, 1H).

$^{13}\text{C}$  NMR ( $\text{CDCl}_3$ , 100 MHz):  $\delta$  172.5, 172.3, 154.4, 131.6, 127.7, 119.4, 83.2 (2C), 65.4, 52.8 (2C), 39.7, 39.6, 26.6, 25.9, 25.1 (2C), 24.8 (2C), 22.8, 22.3.

Retention time: 13.4 & 15.3 min, CHIRALCEL®-IC, *iso*-hexane/*iso*-propanol = 93/7, 30 °C, 0.5 mL/min.

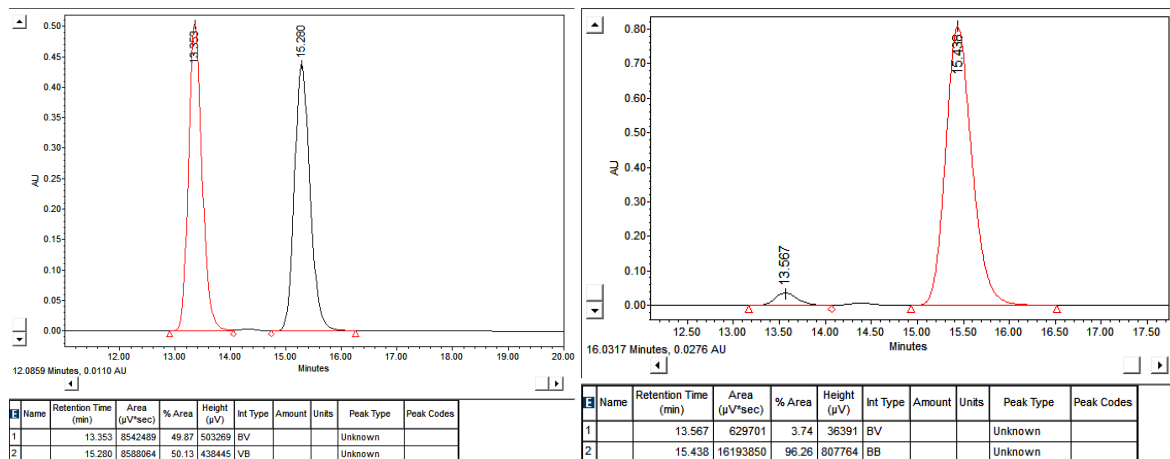



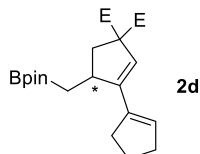

Reaction time: 72 h. Isolated yield: 65 mg (83%). *ee* = 92%.

<sup>1</sup>H NMR (CDCl<sub>3</sub>, 400 MHz): δ 5.80 (m, 1H), 5.52 (s, 1H), 3.72 (s, 3H), 3.70 (s, 3H), 3.16 (m, 1H), 2.73 (dd, *J* = 13.8, 8.7 Hz, 1H), 2.55 – 2.35 (m, 4H), 2.26 (dd, *J* = 13.8, 3.5 Hz, 1H), 1.95 – 1.80 (m, 2H), 1.29 (dd, *J* = 16.0, 3.2 Hz, 1H), 1.24 (s, 6H), 1.24 (s, 6H), 0.77 (dd, *J* = 16.0, 11.6 Hz, 1H).

<sup>13</sup>C NMR (CDCl<sub>3</sub>, 100 MHz): δ 172.3, 172.2, 149.8, 138.0, 130.1, 122.1, 83.2 (2C), 65.5, 52.8 (2C), 40.8, 40.0, 33.5, 33.5, 25.1 (2C), 24.8 (2C), 23.1, 18.3 (C–B).

HRMS (ESI) *m/z* for C<sub>21</sub>H<sub>31</sub>O<sub>6</sub>BNa [M+Na]<sup>+</sup> calcd 413.2110, found 413.2130.

Retention time: 16.0 & 17.5 min, CHIRALCEL®-IC, *iso*-hexane/*iso*-propanol = 96/4, 30 °C, 0.5 mL/min.

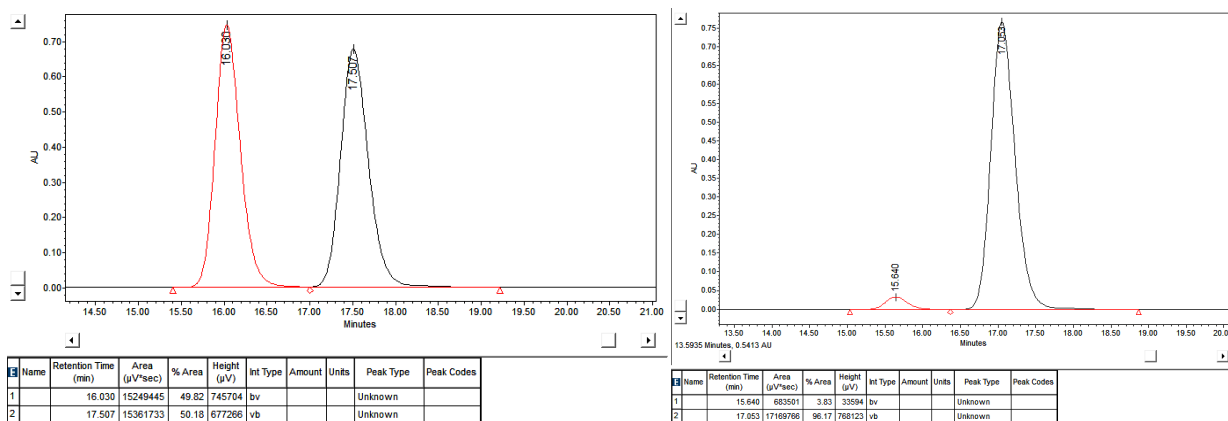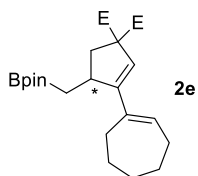

Reaction time: 72 h. Isolated yield: 57 mg (68%). *ee* = 92%.

<sup>1</sup>H NMR (CDCl<sub>3</sub>, 400 MHz): δ 5.92 (t, *J* = 6.8 Hz, 1H), 5.56 (br. s, 1H), 3.72 (s, 3H), 3.70 (s, 3H), 3.17 – 3.11 (m, 1H), 2.74 (dd, *J* = 13.7, 6.8 Hz, 1H), 2.37 – 2.32 (m, 2H), 2.21 (dd, *J* = 13.7, 3.9 Hz, 1H), 2.21 – 2.17 (m, 2H), 1.75 – 1.72 (m, 2H), 1.50 – 1.46 (m, 4H), 1.24 (s, 6H), 1.24 (s, 6H), 1.22 (m, 1H), 0.69 (dd, *J* = 16.1, 11.6 Hz, 1H).

<sup>13</sup>C NMR (CDCl<sub>3</sub>, 100 MHz): δ 172.4, 172.4, 155.5, 139.2, 132.0, 119.8, 83.2 (2C), 65.3, 52.8, 52.8, 40.0, 40.0, 32.5, 31.0, 28.6, 26.8, 26.5, 25.1 (2C), 24.8 (2C).

HRMS (ESI) *m/z* for C<sub>23</sub>H<sub>35</sub>O<sub>6</sub>BNa [M+Na]<sup>+</sup> calcd 441.2423, found 441.2401.

Retention time: 15.0 & 16.5 min, CHIRALCEL®-IC, *iso*-hexane/*iso*-propanol = 95/5, 30 °C, 0.5 mL/min.

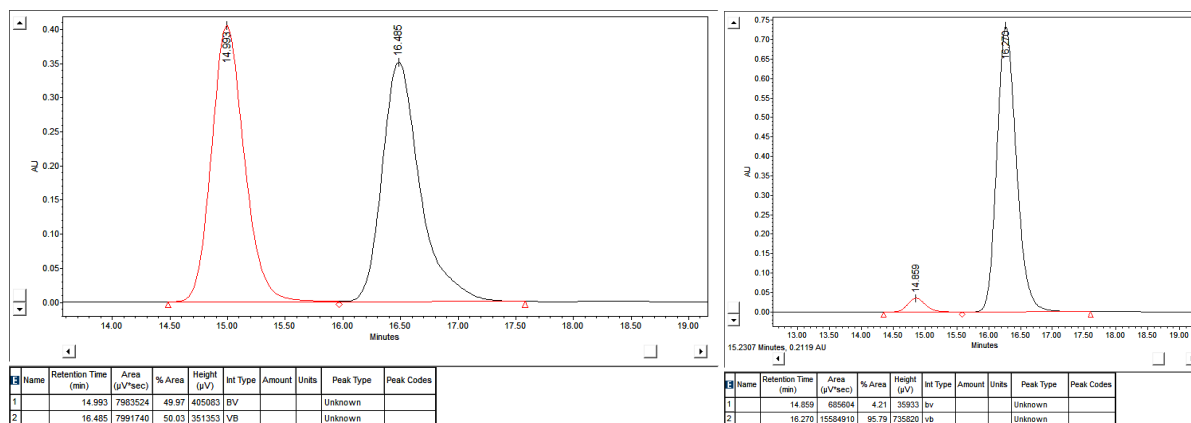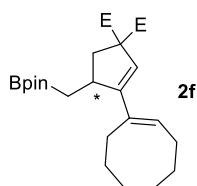

Reaction time: 96 h. Isolated yield: 74 mg (86%). *ee* = 88%.

<sup>1</sup>H NMR (CDCl<sub>3</sub>, 400 MHz): δ 5.75 (t, *J* = 8.2 Hz, 1H), 5.61 (s, 1H), 3.71 (s, 3H), 3.70 (s, 3H), 3.20 – 3.14 (m, 1H), 2.69 (dd, *J* = 13.6, 8.4 Hz, 1H), 2.40 – 2.38 (m, 2H), 2.27 (dd, *J* = 13.6, 3.1 Hz, 1H), 2.22 – 2.16 (m, 2 H), 1.54 – 1.40 (m, 8H), 1.27 (dd, *J* = 16.2, 3.2 Hz, 1H), 1.25 (s, 6H), 1.24 (s, 6H), 0.69 (dd, *J* = 16.2, 11.9 Hz, 1H).

<sup>13</sup>C NMR (CDCl<sub>3</sub>, 100 MHz): δ 172.4, 172.3, 153.6, 135.0, 130.4, 120.3, 83.2 (2C), 65.3, 52.8 (2C), 39.7, 39.5, 30.3, 29.0, 27.2, 27.0, 26.9, 26.2, 25.1 (2C), 24.8 (2C), 18.2 (C–B).

HRMS (ESI) *m/z* for C<sub>24</sub>H<sub>37</sub>O<sub>6</sub>BNa [M+Na]<sup>+</sup> calcd 455.2580, found 455.2601.

Retention time: 14.9 & 17.3 min, CHIRALCEL®-IC, *iso*-hexane/*iso*-propanol = 95/5, 30 °C, 0.5 mL/min.

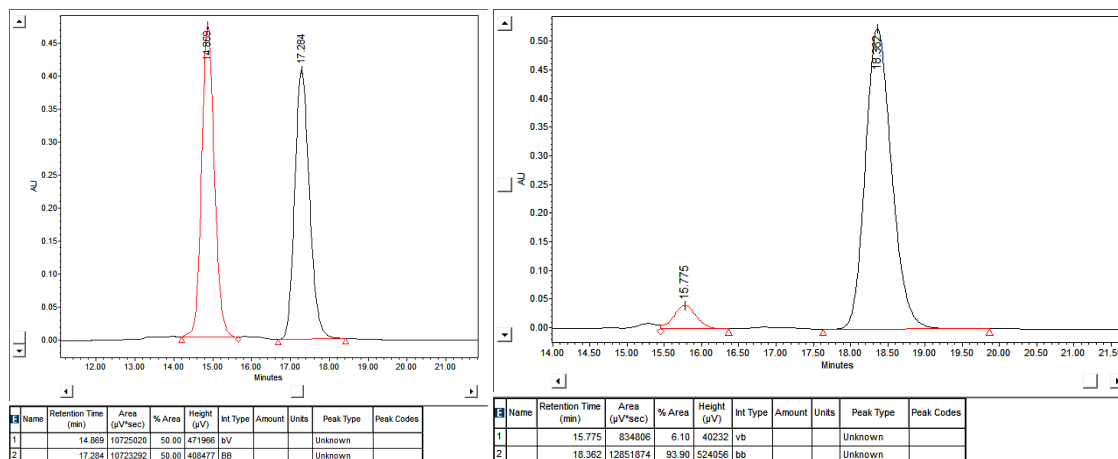

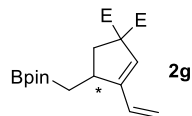

Reaction time: 96 h. Isolated yield: 24 mg (34%). *ee* = 51%.

<sup>1</sup>H NMR (CDCl<sub>3</sub>, 400 MHz): δ 6.37 (dd, *J* = 17.8, 11.0 Hz, 1H), 5.68 (br. s, 1H), 5.31 (dd, *J* = 17.8, 0.9 Hz, 1H), 5.20 (dd, *J* = 11.0, 1.2 Hz, 1H), 3.73 (s, 3H), 3.71 (s, 3H), 3.15 (m, 1H), 2.77 (dd, *J* = 13.8, 8.5 Hz, 1H), 2.23 (dd, *J* = 13.8, 3.8 Hz, 1H), 1.27 (dd, *J* = 16.0, 3.6 Hz, 1H), 1.25 (s, 6H), 1.24 (s, 6H), 0.75 (dd, *J* = 16.0, 11.4 Hz, 1H).

<sup>13</sup>C NMR (CDCl<sub>3</sub>, 100 MHz): δ 172.0, 171.9, 151.7, 131.4, 125.3, 117.5, 83.3 (2C), 65.3, 52.9 (2C), 40.0, 39.4, 25.1 (2C), 24.8 (2C).

HRMS (ESI) *m/z* for C<sub>18</sub>H<sub>27</sub>O<sub>6</sub>BNa [M+Na]<sup>+</sup> calcd 373.1796, found 373.1812.

Retention time: 36.1 & 40.1 min, CHIRALCEL®-ID, *iso*-hexane/*iso*-propanol = 99/1, 30 °C, 0.3 mL/min.

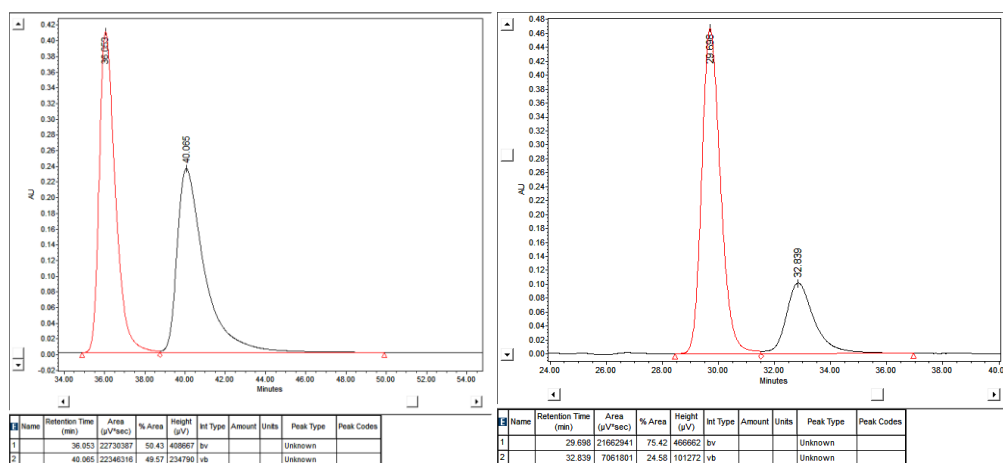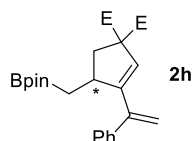

Reaction time: 48 h. Isolated yield: 64 mg (75%). *ee* = 71%.

<sup>1</sup>H NMR (CDCl<sub>3</sub>, 400 MHz): δ 7.36 – 7.27 (m, 5H), 5.60 (d, *J* = 1.4 Hz, 1H), 5.33 (d, *J* = 1.2 Hz, 1H), 5.26 (d, *J* = 1.2 Hz, 1H), 3.74 (s, 3H), 3.69 (s, 3H), 3.27 (m, 1H), 2.88 (dd, *J* = 13.8, 8.4 Hz, 1H), 2.22 (dd, *J* = 13.8, 4.9 Hz, 1H), 1.24 (dd, *J* = 16.1, 3.7 Hz, 1H), 1.23 (s, 12H), 0.78 (dd, *J* = 16.1, 11.2 Hz, 1H).

<sup>13</sup>C NMR (CDCl<sub>3</sub>, 100 MHz): δ 172.0, 171.8, 153.4, 144.3, 140.9, 128.2 (2C), 128.0 (2C), 127.6, 126.2, 116.0, 83.2 (2C), 65.5, 52.8, 52.8, 40.8, 39.8, 25.0 (2C), 24.8 (2C), 17.1 (C–B).

Retention time: 15.4 & 22.2 min, CHIRALCEL®-OJ, *iso*-hexane/*iso*-propanol = 98/2, 30 °C, 0.5 mL/min.

HRMS (ESI) *m/z* for C<sub>24</sub>H<sub>31</sub>O<sub>6</sub>BNa [M+Na]<sup>+</sup> calcd 449.2110, found 449.2093.

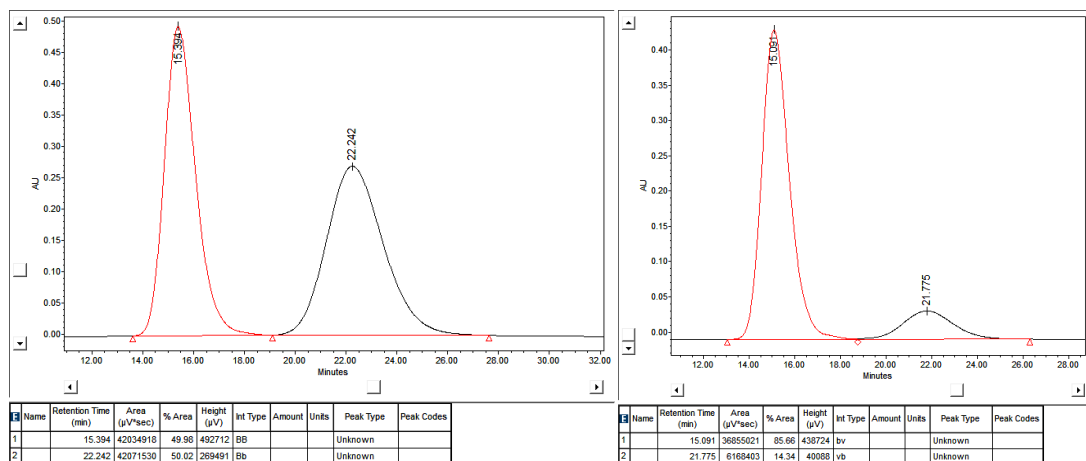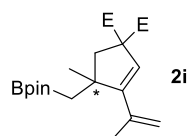

Reaction time: 96 h. Isolated yield: 64 mg (79%). *ee* = 75%.

<sup>1</sup>H NMR (CDCl<sub>3</sub>, 400 MHz): δ 5.64 (s, 1H), 5.14 (br. s, 1H), 5.02 (m, 1H), 3.71 (s, 3H), 3.71 (s, 3H), 2.62 (d, *J* = 13.8 Hz, 1H), 2.46 (d, *J* = 13.8 Hz, 1H), 1.89 (br. s, 3H), 1.31 (s, 3H), 1.28 (d, *J* = 15.4 Hz, 1H), 1.20 (s, 12H), 1.07 (d, *J* = 15.4 Hz, 1H).

<sup>13</sup>C NMR (CDCl<sub>3</sub>, 100 MHz): δ 172.1, 172.0, 156.0, 138.1, 123.8, 115.2, 83.0 (2C), 63.5, 52.9, 52.7, 47.9, 47.8, 29.2, 24.9 (2C), 24.9 (2C), 23.7.

Retention time: 29.4 & 35.7 min, CHIRALCEL®-OJ, *iso*-hexane/*iso*-propanol = 99/1, 25 °C, 0.3 mL/min.

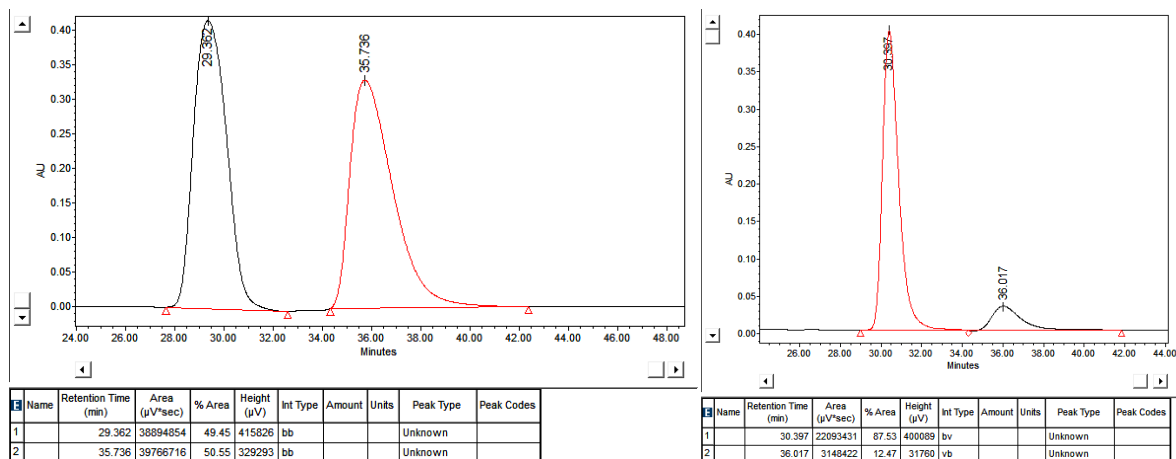

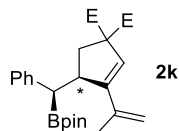

Reaction time: 86 h. Isolated yield: 9 mg (10%). *ee* = 68%.

<sup>1</sup>H NMR (CDCl<sub>3</sub>, 400 MHz): δ 7.25 – 7.21 (m, 4H), 7.14 (m, 1H), 5.77 (d, *J* = 1.3 Hz, 1H), 4.94 (m, 1H), 4.91 (br. s, 1H), 3.77 (s, 3H), 3.67 (s, 3H), 3.48 (m, 1H), 2.92 (d, *J* = 6.0 Hz, 1H), 2.70 (dd, *J* = 14.1, 8.3 Hz, 1H), 2.62 (dd, *J* = 14.1, 5.5 Hz, 1H), 1.86 (br. s, 3H), 1.21 (s, 6H), 1.18 (s, 6H).

<sup>13</sup>C NMR (CDCl<sub>3</sub>, 100 MHz): δ 171.9, 171.8, 152.2, 141.9, 138.6, 129.5 (2C), 128.4 (2C), 125.7, 124.2, 115.2, 83.4 (2C), 65.3, 52.9, 52.6, 48.1, 36.5, 24.9 (2C), 25.7 (2C), 21.6.

HRMS (ESI) *m/z* for C<sub>25</sub>H<sub>33</sub>O<sub>6</sub>BNa [M+Na]<sup>+</sup> calcd 463.2267, found 463.2273.

Retention time: 23.7 & 36.9 min, CHIRALCEL®-IA, *iso*-hexane/*iso*-propanol = 99/1, 25 °C, 0.3 mL/min.

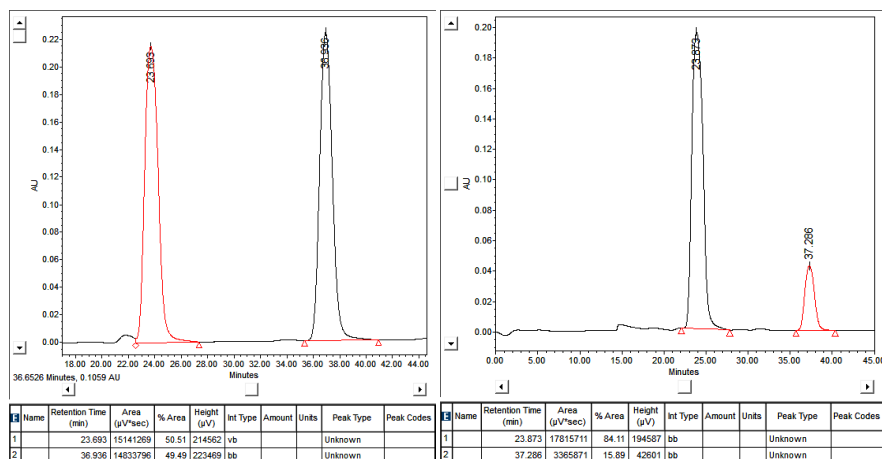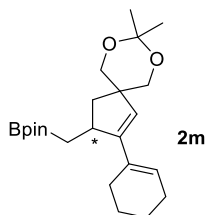

Reaction time: 108 h. Isolated yield: 59 mg (76%). *ee* = 93%.

<sup>1</sup>H NMR (CDCl<sub>3</sub>, 400 MHz): δ 5.75 (t, *J* = 3.8 Hz, 1H), 5.52 (br. s, 1H), 3.76 (d, *J* = 11.2 Hz, 1H), 3.68 (d, *J* = 11.2 Hz, 1H), 3.63 (d, *J* = 11.2 Hz, 1H), 3.54 (d, *J* = 11.2 Hz, 1H), 3.14 – 3.09 (m, 1H), 2.28 – 2.21 (m, 1H), 2.15 – 2.06 (m, 3H), 2.04 (dd, *J* = 13.8, 9.1 Hz, 1H), 1.67 – 1.55 (m, 4H), 1.52 (dd, *J* = 13.8, 3.5 Hz, 1H), 1.43 (s, 3H), 1.42 (s, 3H), 1.32 (dd, *J* = 15.9, 3.0 Hz, 1H), 1.25 (s, 6H), 1.23 (s, 6H), 0.64 (dd, *J* = 15.9, 11.5 Hz, 1H).

<sup>13</sup>C NMR (CDCl<sub>3</sub>, 100 MHz): δ 151.6, 132.2, 125.9, 124.7, 97.5, 83.1 (2C), 69.8, 69.6, 48.0, 40.0, 38.9, 26.7, 25.8, 25.1 (2C), 24.8 (2C), 24.4, 23.6, 22.9, 22.4, 20.1 (C–B).

HRMS (ESI) *m/z* for C<sub>23</sub>H<sub>37</sub>BO<sub>4</sub>Na [M+Na]<sup>+</sup> calcd 411.2677, found 411.2691.

Retention time: 14.3 & 15.3 min, CHIRALCEL®-IA, *iso*-hexane/*iso*-propanol = 98/2, 25 °C, 0.3 mL/min.

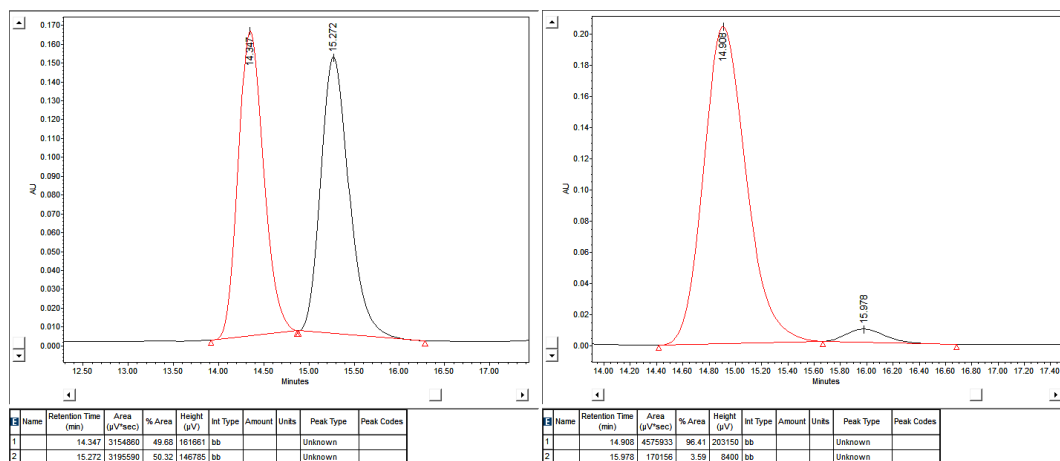

- (1) Black, D. K.; Landor, S. R.; Patel, A. N.; Whiter, P. F. *Tetrahedron Lett.* **1963**, *4*, 483.
- (2) Franzén, J.; Bäckvall, J.-E. *J. Am. Chem. Soc.* **2003**, *125*, 6056
- (3) Deng, Y.; Bäckvall, J.-E. *Angew. Chem. Int. Ed.* **2013**, *52*, 3217.
- (4) (a) Hatano, M.; Ikeno, T.; Matsumura, T.; Torii, S.; Ishihara, K. *Adv. Synth. Catal.* **2008**, *350*, 1776–1780. (b) Storer, R. I.; Carrera, D. E.; Ni, Y.; Macmillan, D. W. C. *J. Am. Chem. Soc.* **2006**, *128*, 84–86. (c) Holloway, C. A.; Muratore, M. E.; Storer, R.; Dixon, D. J. *Org. Lett.* **2010**, *12*, 4720–4723. (d) Itoh, J.; Fuchibe, K.; Akiyama, T. *Angew. Chem. Int. Ed.* **2006**, *45*, 4796–4798. (e) Yamanaka, M.; Itoh, J.; Fuchibe, K.; Akiyama, T. *J. Am. Chem. Soc.* **2007**, *129*, 6756–6764. (f) Seayad, J.; Seayad, A. M.; List, B. *J. Am. Chem. Soc.* **2006**, *128*, 1086–1087. (g) Huang, Y.-Y.; Chakrabarti, A.; Morita, N.; Schneider, U.; Kobayashi, S. *Angew. Chem. Int. Ed.* **2011**, *50*, 11121–11124.
- (5) (a) Alexander, J. B.; La, D. S.; Cefalo, D. R.; Hoveyda, A. H.; Schrock, R. R. *J. Am. Chem. Soc.* **1998**, *120*, 4041–4042. (b) Schrock, R. R.; Hoveyda, A. H. WO2000002834 A1, **2000**.
- (6) Gutierrez, E. G.; Moorhead, E. J.; Smith, E. H.; Lin, V.; Ackerman, L. K. G.; Knezevic, C. E.; Sun, V.; Grant, S.; Wenzel, A. G. *Eur. J. Org. Chem.* **2010**, 3027–3031.
- (7) Hua, Z.; Vassar, V. C.; Ojima, I. *Org. Lett.* **2003**, *5*, 3831–3834.
- (8) Nakashima, D.; Yamamoto, H. *J. Am. Chem. Soc.* **2006**, *128*, 9626–9627.
- (9) Persson, A. K. Å.; Jiang, T.; Johnson, M. T.; Bäckvall, J.-E. *Angew. Chem. Int. Ed.* **2011**, *50*, 6155–6159.

7.260  
5.764  
5.746  
5.738  
5.728  
5.721  
5.703  
5.696  
5.685  
5.678  
5.660  
5.522  
5.515  
5.508  
5.500  
5.493  
5.108  
5.104  
5.099  
5.095  
5.070  
5.067  
5.065  
5.062  
5.056  
5.053  
5.044  
5.042  
5.039  
5.037  
5.034  
4.221  
4.212  
4.205  
4.194  
4.187  
4.176  
4.169  
4.158  
4.152  
4.143  
2.740  
2.737  
2.735  
2.722  
2.719  
2.716  
1.695  
1.688  
1.262  
1.245  
1.227

NAME TJ-20130910-D-679-diEt-prod  
EXPNO 10  
PROCNO 1  
Date\_ 20130910  
Time 16.51  
INSTRUM spect  
PROBHD 5 mm PABBO BB-  
PULPROG zg30  
TD 65536  
SOLVENT CDCl3  
NS 16  
DS 2  
SWH 8223.685 Hz  
FIDRES 0.125483 Hz  
AQ 3.9846387 sec  
RG 724  
DW 60.800 usec  
DE 6.50 usec  
TE 297.7 K  
D1 1.00000000 sec  
TD0 1

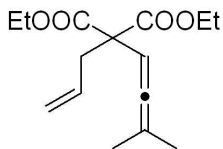

**1b**

==== CHANNEL f1 =====  
NUC1 1H  
P1 8.90 usec  
PL1 -4.00 dB  
PL1W 24.73352814 W  
SFO1 400.1324710 MHz  
SI 32768  
SF 400.1300095 MHz  
WDW EM  
SSB 0  
LB 0.30 Hz  
GB 0  
PC 1.00

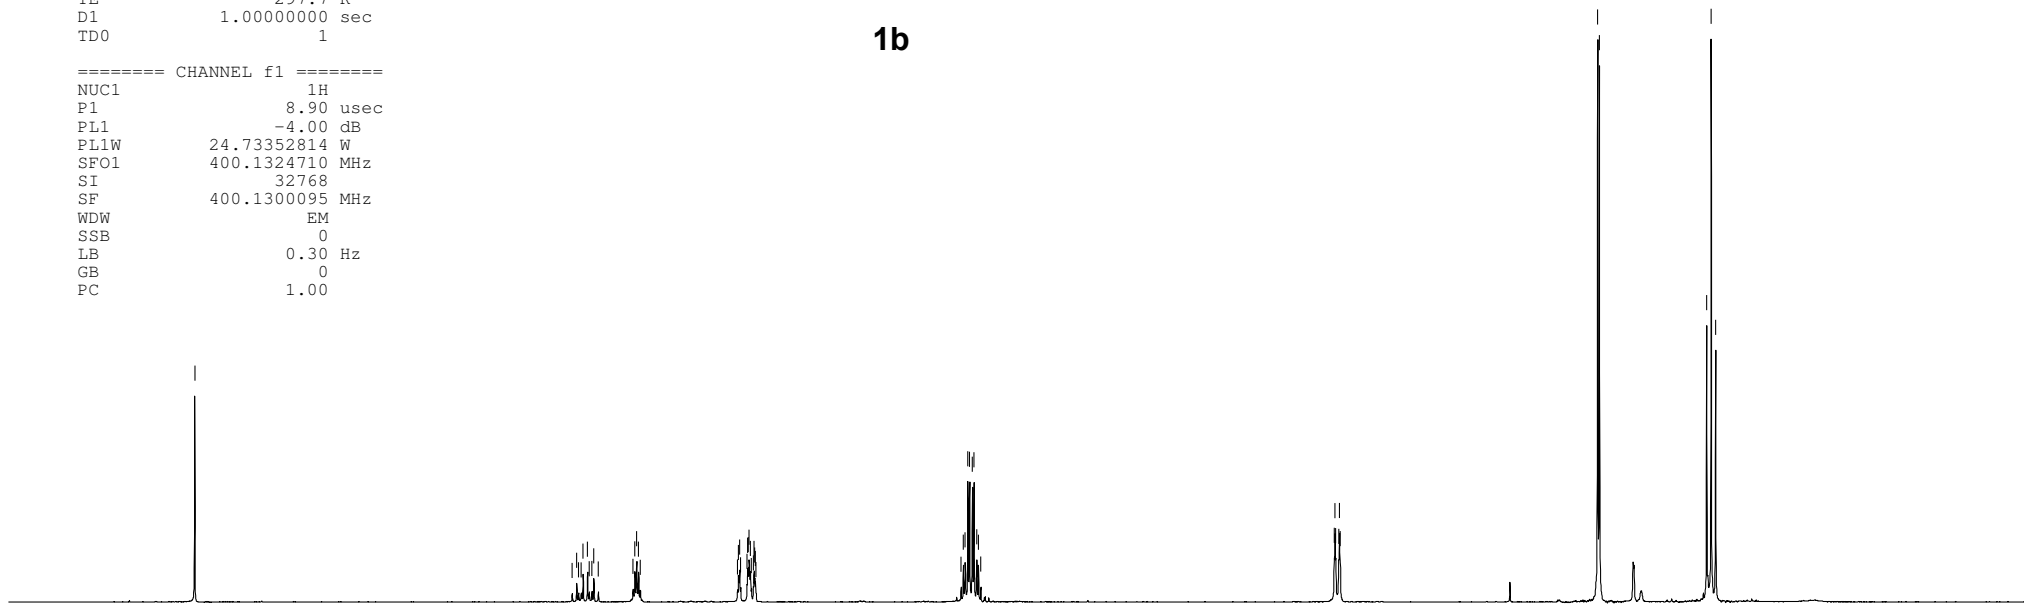

7.5 7.0 6.5 6.0 5.5 5.0 4.5 4.0 3.5 3.0 2.5 2.0 1.5 1.0 0.5 ppm

1.01  
0.95  
2.00  
3.89  
1.97  
5.88  
6.07

— 201.892  
 — 170.358  
 — 133.145  
 — 118.582  
 — 99.937  
 — 88.472  
 77.478  
 77.160  
 76.842  
 — 61.556  
 — 58.138  
 — 38.852  
 — 20.203  
 — 14.218

```

NAME TJ-20130910-D-679-diEt-prod
EXPNO 12
PROCNO 1
Date_ 20130911
Time 0.05
INSTRUM spect
PROBHD 5 mm PABBO BB-
PULPROG zgpg30
TD 65536
SOLVENT CDCl3
NS 1024
DS 4
SWH 24038.461 Hz
FIDRES 0.366798 Hz
AQ 1.3631988 sec
RG 2050
DW 20.800 usec
DE 51.93 usec
TE 298.8 K
D1 2.00000000 sec
D11 0.03000000 sec
TD0 1
  
```

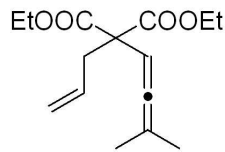

**1b**

```

===== CHANNEL f1 =====
NUC1 13C
P1 6.43 usec
PL1 -3.00 dB
PL1W 69.66502380 W
SFO1 100.6228298 MHz

===== CHANNEL f2 =====
CPDPRG2 waltz16
NUC2 1H
PCPD2 80.00 usec
PL2 16.00 dB
PL12 15.00 dB
PL13 15.00 dB
PL2W 0.24733528 W
PL12W 0.31137666 W
PL13W 0.31137666 W
SFO2 400.1316005 MHz
SI 32768
SF 100.6127539 MHz
WDW EM
SSB 0
LB 1.00 Hz
GB 0
PC 1.40
  
```

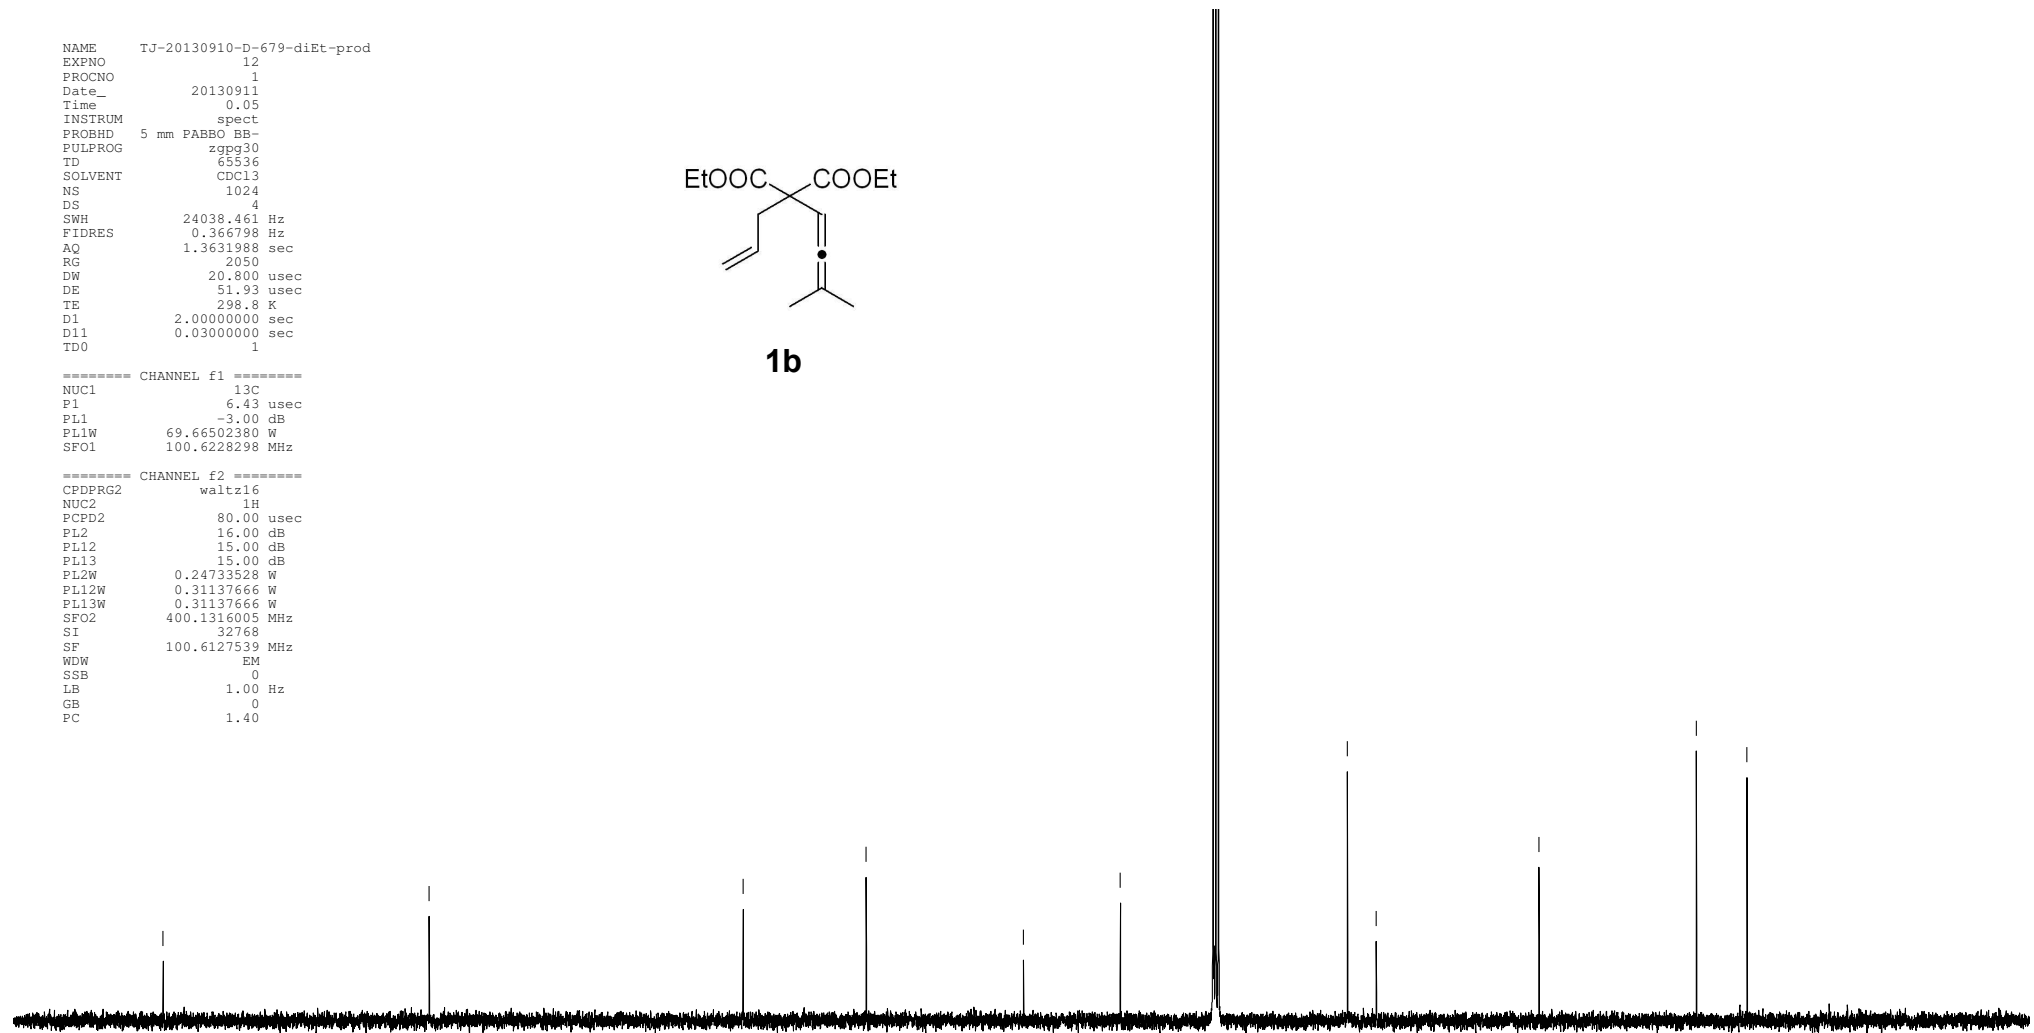

210 200 190 180 170 160 150 140 130 120 110 100 90 80 70 60 50 40 30 20 10 0 ppm



5.763  
5.746  
5.738  
5.728  
5.720  
5.703  
5.696  
5.685  
5.678  
5.660  
5.596  
5.586  
5.576  
5.566  
5.556  
5.104  
5.100  
5.099  
5.095  
5.092  
5.072  
5.069  
5.067  
5.064  
5.061  
5.058  
5.056  
5.053  
5.049  
5.047  
5.044  
5.042  
5.039  
5.036  
3.720  
2.750  
2.747  
2.745  
2.732  
2.729  
2.727  
2.391  
2.389  
2.380  
2.373  
2.370  
2.363  
2.361  
2.354  
2.344  
1.687  
1.678  
1.670  
1.668  
1.660  
1.652

NAME TJ-20140808-E-988-prod  
EXPNO 10  
PROCNO 1  
Date\_ 20140808  
Time 21.48  
INSTRUM spect  
PROBHD 5 mm PABBO BB/  
PULPROG zg30  
TD 65536  
SOLVENT CDCl3  
NS 16  
DS 2  
SWH 8012.820 Hz  
FIDRES 0.122266 Hz  
AQ 4.0894966 sec  
RG 171.39  
DW 62.400 usec  
DE 6.50 usec  
TE 300.7 K  
D1 1.00000000 sec  
TDO 1

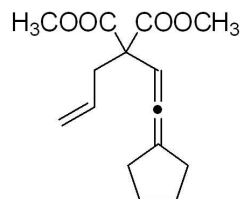

**1d**

===== CHANNEL f1 =====  
SFO1 400.2424716 MHz  
NUC1 1H  
P1 9.40 usec  
SI 65536  
SF 400.2400096 MHz  
WDW EM  
SSB 0  
LB 0.30 Hz  
GB 0  
PC 1.00

7.5 7.0 6.5 6.0 5.5 5.0 4.5 4.0 3.5 3.0 2.5 2.0 1.5 1.0 0.5 ppm

1.00  
0.94  
2.03  
6.13  
2.01  
3.99  
4.02

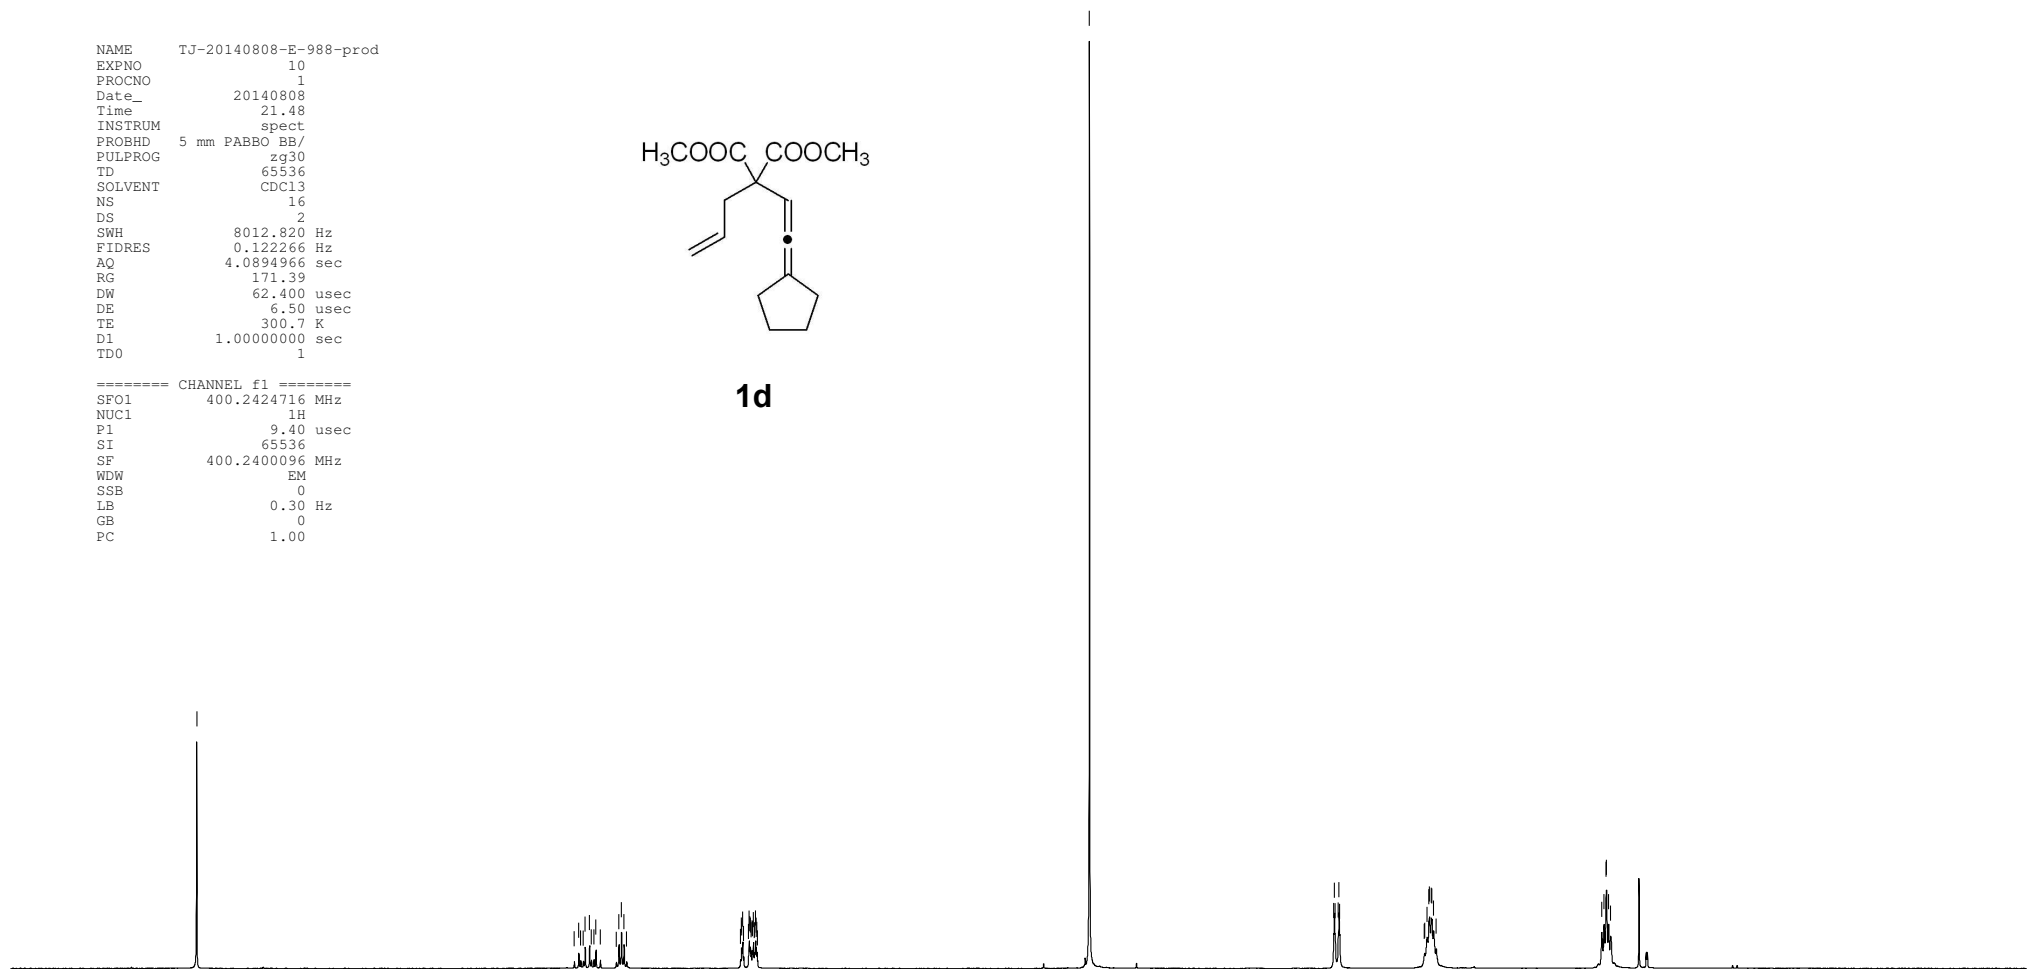

NAME TJ-20140808-E-988-cyclopentyl-enallene-prod  
 EXPNO 12  
 PROCNO 1  
 Date\_ 20140808  
 Time\_ 10.17  
 INSTRUM spect  
 PROBHD 5 mm F4BBO BB/  
 PULPROG zgpg30  
 TD 65536  
 SOLVENT CDCl3  
 NS 176  
 DS 4  
 SWH 24038.461 Hz  
 FIDRES 0.366798 Hz  
 AQ 1.3631988 sec  
 RG 191.9  
 DW 20.800 usec  
 DE 6.50 usec  
 TE 301.0 K  
 D1 2.00000000 sec  
 D11 0.03000000 sec  
 TD0 1  
  
 ===== CHANNEL f1 =====  
 SFO1 100.6504912 MHz  
 NUC1 13C  
 P1 9.20 usec  
 SI 32768  
 SF 100.6404120 MHz  
 WDW EM  
 SSB 0  
 LB 1.00 Hz  
 GB 0  
 PC 1.40

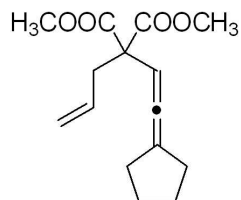

1d

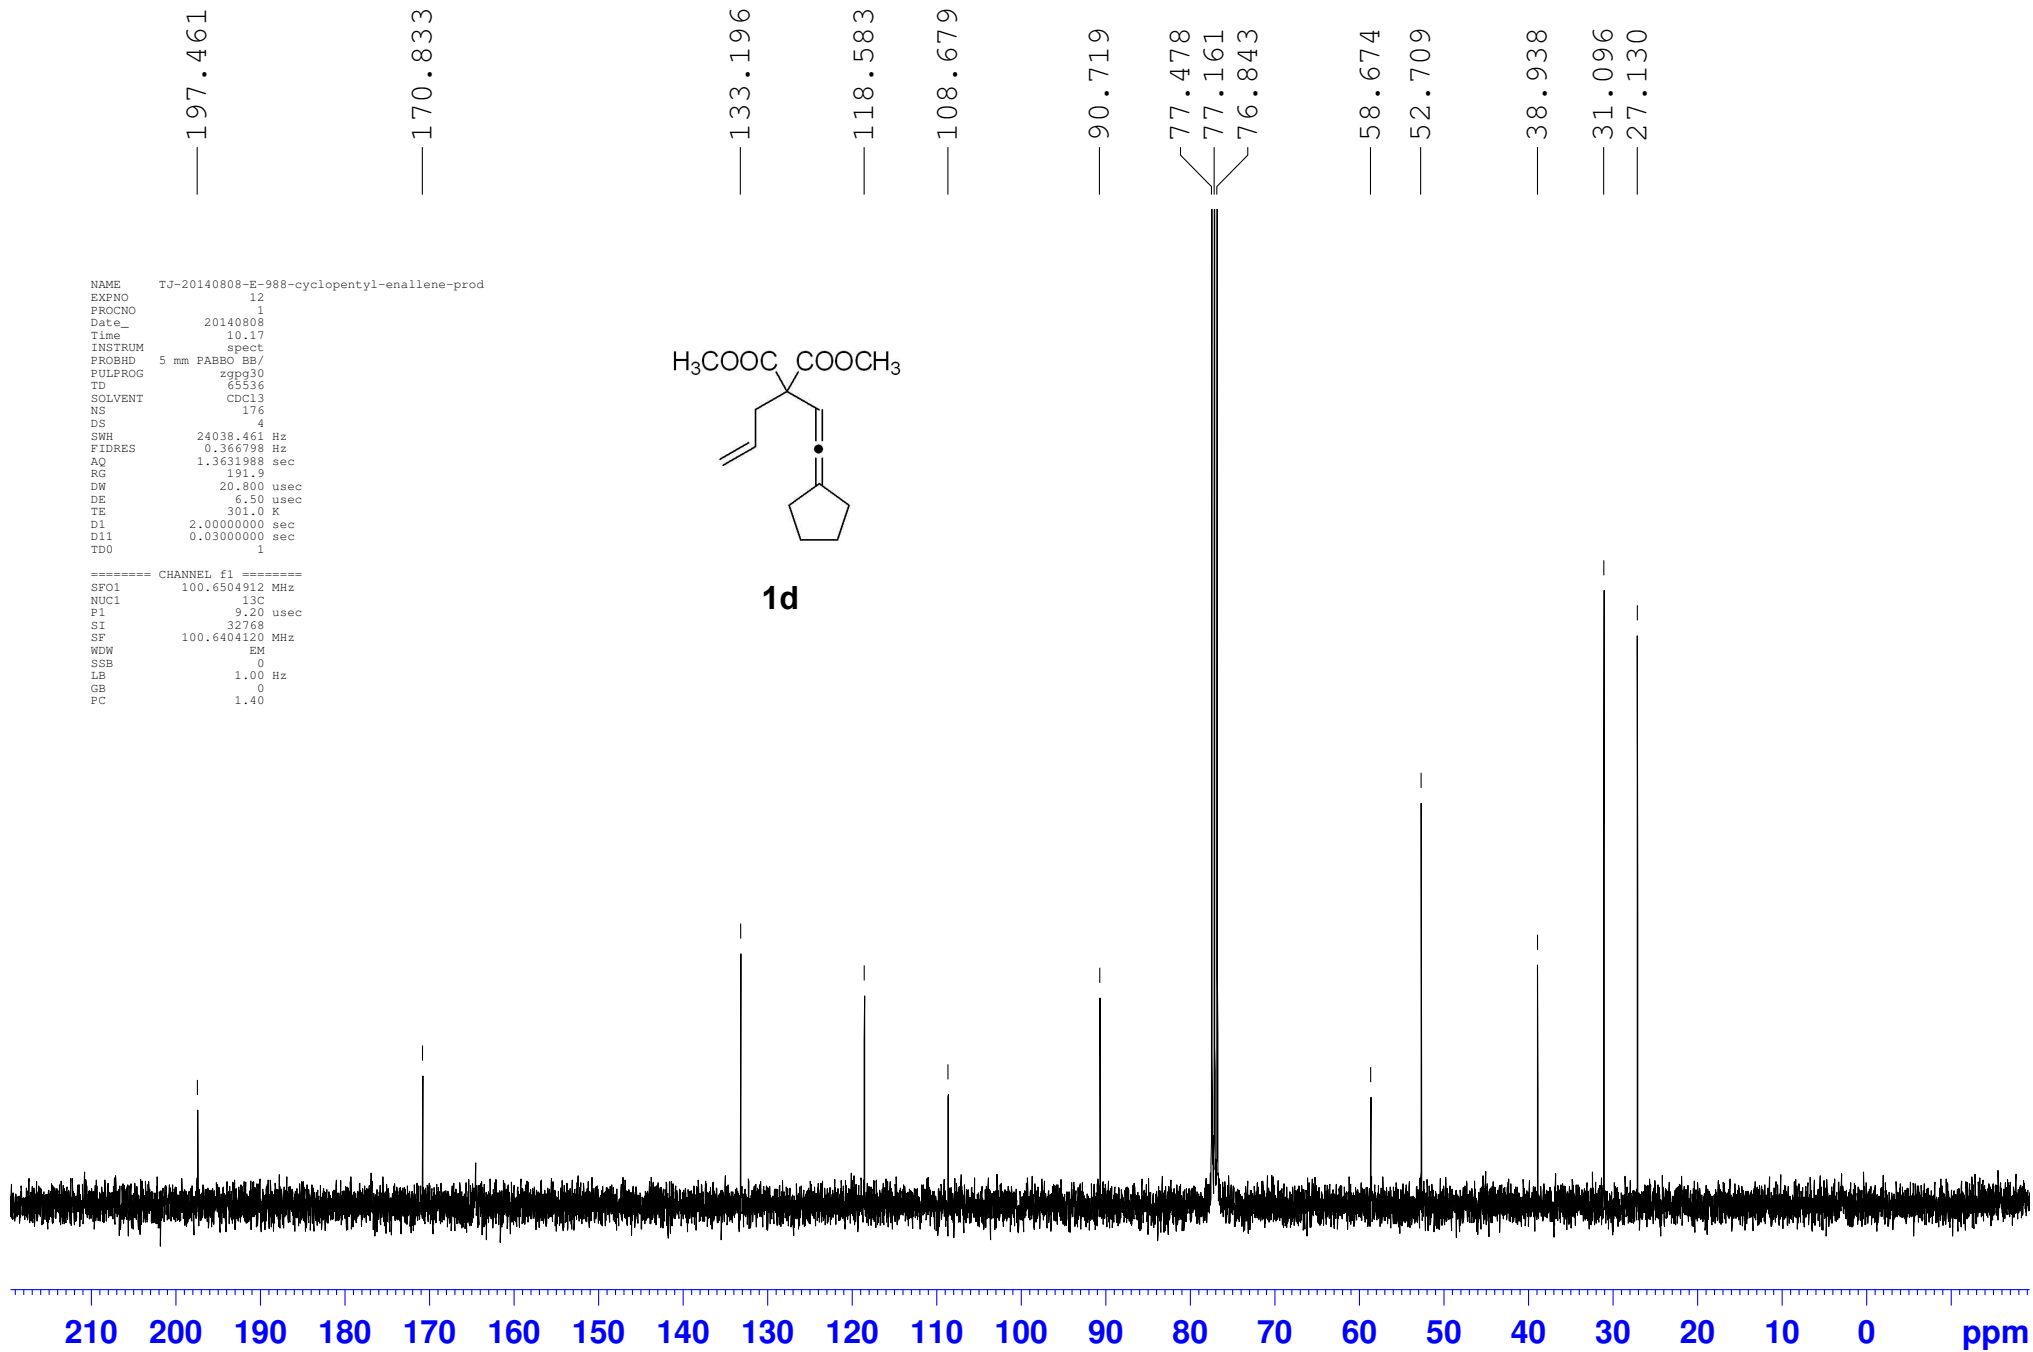

7.260  
5.779  
5.761  
5.754  
5.744  
5.736  
5.719  
5.711  
5.701  
5.693  
5.676  
5.515  
5.509  
5.503  
5.497  
5.491  
5.111  
5.107  
5.106  
5.102  
5.099  
5.068  
5.065  
5.063  
5.060  
5.056  
5.045  
5.042  
5.040  
5.037  
5.035  
3.719  
2.759  
2.756  
2.753  
2.741  
2.738  
2.735  
2.266  
2.261  
2.251  
2.245  
2.236  
2.230  
1.638  
1.626  
1.620  
1.618  
1.612  
1.597  
1.551  
1.543  
1.537  
1.532  
1.530  
1.524

NAME TJ-20140815-E-1000-ch-frac10-24  
EXPNO 11  
PROCNO 1  
Date\_ 20140815  
Time 23.45  
INSTRUM spect  
PROBHD 5 mm PABBO BB/  
PULPROG zg30  
TD 65536  
SOLVENT CDC13  
NS 16  
DS 2  
SWH 8012.820 Hz  
FIDRES 0.122266 Hz  
AQ 4.0894966 sec  
RG 139.19  
DW 62.400 usec  
DE 6.50 usec  
TE 299.9 K  
D1 1.00000000 sec  
TD0 1

==== CHANNEL f1 =====  
SFO1 400.2424716 MHz  
NUC1 1H  
P1 9.40 usec  
SI 65536  
SF 400.2400096 MHz  
WDW EM  
SSB 0  
LB 0.30 Hz  
GB 0  
PC 1.00

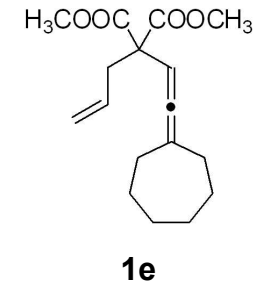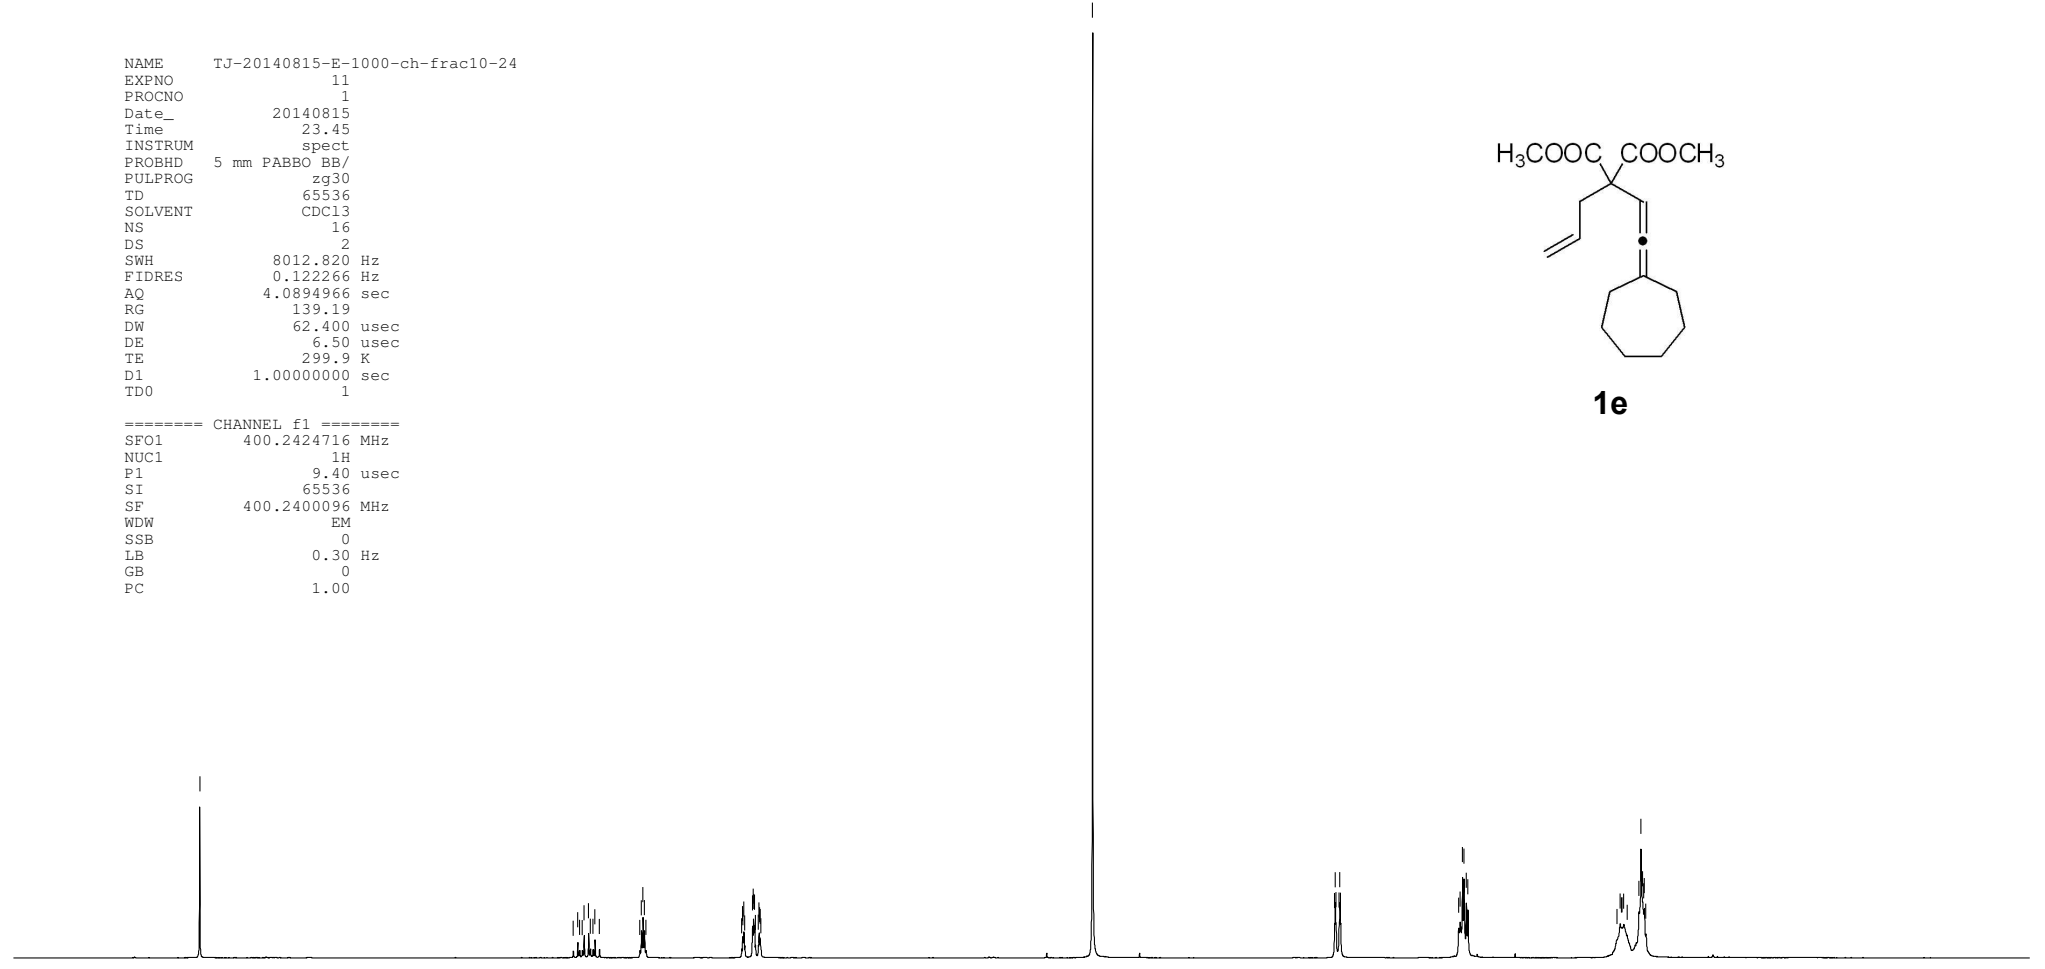

7.5 7.0 6.5 6.0 5.5 5.0 4.5 4.0 3.5 3.0 2.5 2.0 1.5 1.0 0.5 ppm

1.00  
0.95  
2.05  
6.12  
2.05  
4.11  
4.04  
4.22

— 201.821

— 170.861

— 133.184

— 118.605

— 109.414

— 88.076

77.477

77.159

76.842

— 58.460

— 52.695

— 39.221

32.155

29.472

28.464

NAME TJ-20140815-E-1000-ch-frac10-24  
EXPNO 12  
PROCNO 1  
Date\_ 20140816  
Time 0.56  
INSTRUM spect  
PROBHD 5 mm PABBO BB/  
PULPROG zgpg30  
TD 65536  
SOLVENT CDCl3  
NS 1024  
DS 4  
SWH 24038.461 Hz  
FIDRES 0.366798 Hz  
AQ 1.3631988 sec  
RG 191.9  
DW 20.800 usec  
DE 6.50 usec  
TE 300.7 K  
D1 2.00000000 sec  
D11 0.03000000 sec  
TD0 1

===== CHANNEL f1 =====  
SFO1 100.6504912 MHz  
NUC1 13C  
P1 9.20 usec  
SI 32768  
SF 100.6404119 MHz  
WDW EM  
SSB 0  
LB 1.00 Hz  
GB 0  
PC 1.40

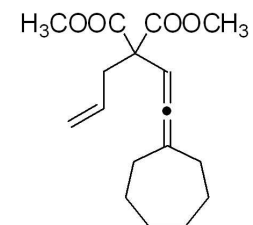

**1e**

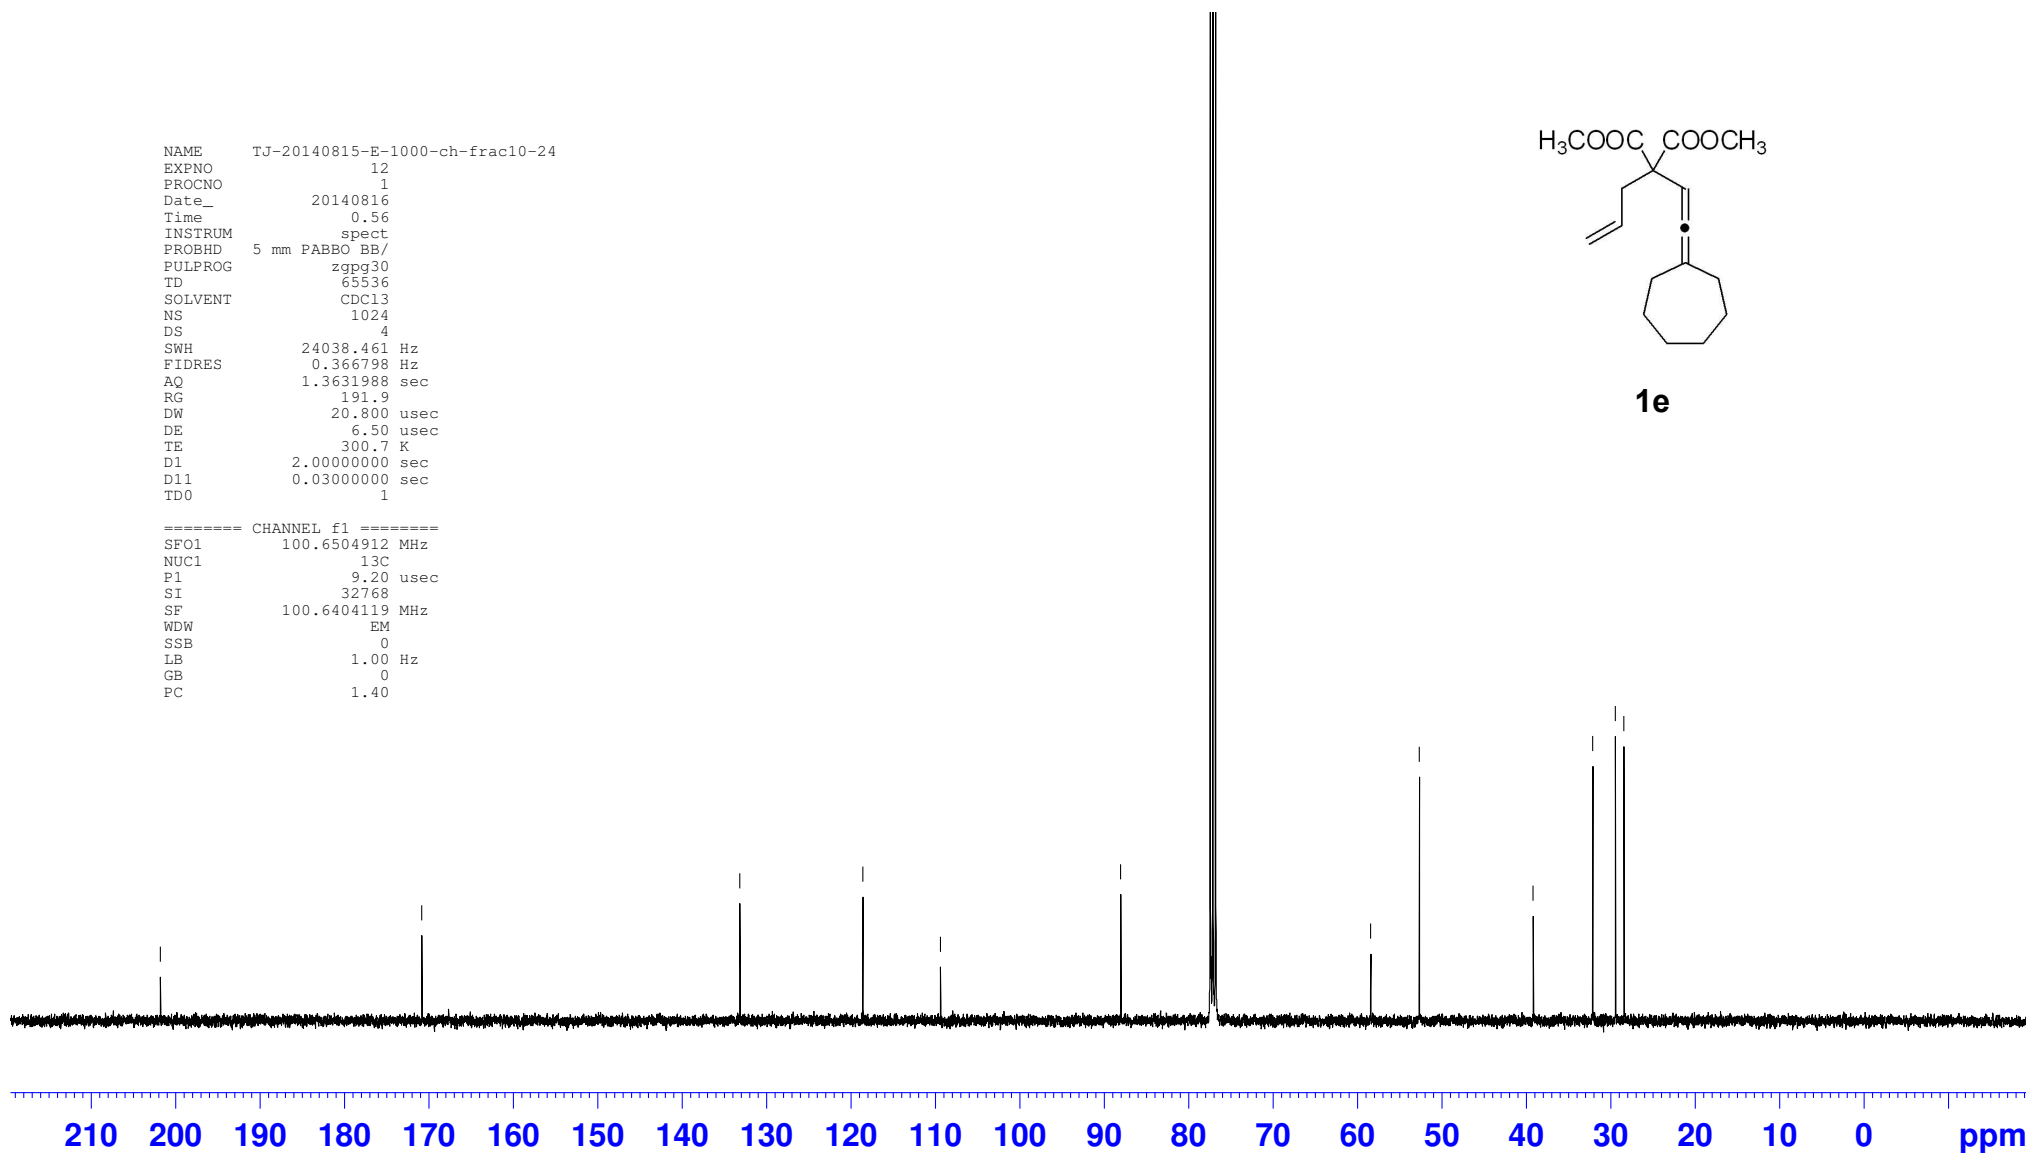

7.260  
 5.790  
 5.772  
 5.764  
 5.754  
 5.746  
 5.729  
 5.721  
 5.711  
 5.704  
 5.686  
 5.557  
 5.552  
 5.547  
 5.541  
 5.536  
 5.109  
 5.106  
 5.101  
 5.098  
 5.069  
 5.067  
 5.064  
 5.059  
 5.055  
 5.044  
 5.041  
 5.039  
 3.719  
 2.755  
 2.737  
 2.195  
 2.190  
 2.181  
 2.176  
 2.164  
 2.154  
 2.148  
 1.654  
 1.639  
 1.626  
 1.611  
 1.596  
 1.588  
 1.575  
 1.570  
 1.564  
 1.555  
 1.540  
 1.530  
 1.522  
 1.509

NAME TJ-20140901-E-1014-co-enallene-fracl6-26  
 EXPNO 12  
 PROCNO 1  
 Date\_ 20140901  
 Time 20.08  
 INSTRUM spect  
 PROBHD 5 mm PABBO BB/  
 PULPROG zg30  
 TD 65536  
 SOLVENT CDCl3  
 NS 16  
 DS 2  
 SWH 8012.820 Hz  
 FIDRES 0.122266 Hz  
 AQ 4.0894966 sec  
 RG 139.19  
 DW 62.400 usec  
 DE 6.50 usec  
 TE 298.2 K  
 D1 1.00000000 sec  
 TDO 1  
 ===== CHANNEL f1 =====  
 SP01 400.2424716 MHz  
 NUC1 1H  
 P1 9.40 usec  
 SI 65536  
 SF 400.2400096 MHz  
 WDW EM  
 SSB 0  
 LB 0.30 Hz  
 GB 0  
 PC 1.00

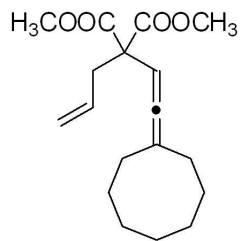

1f

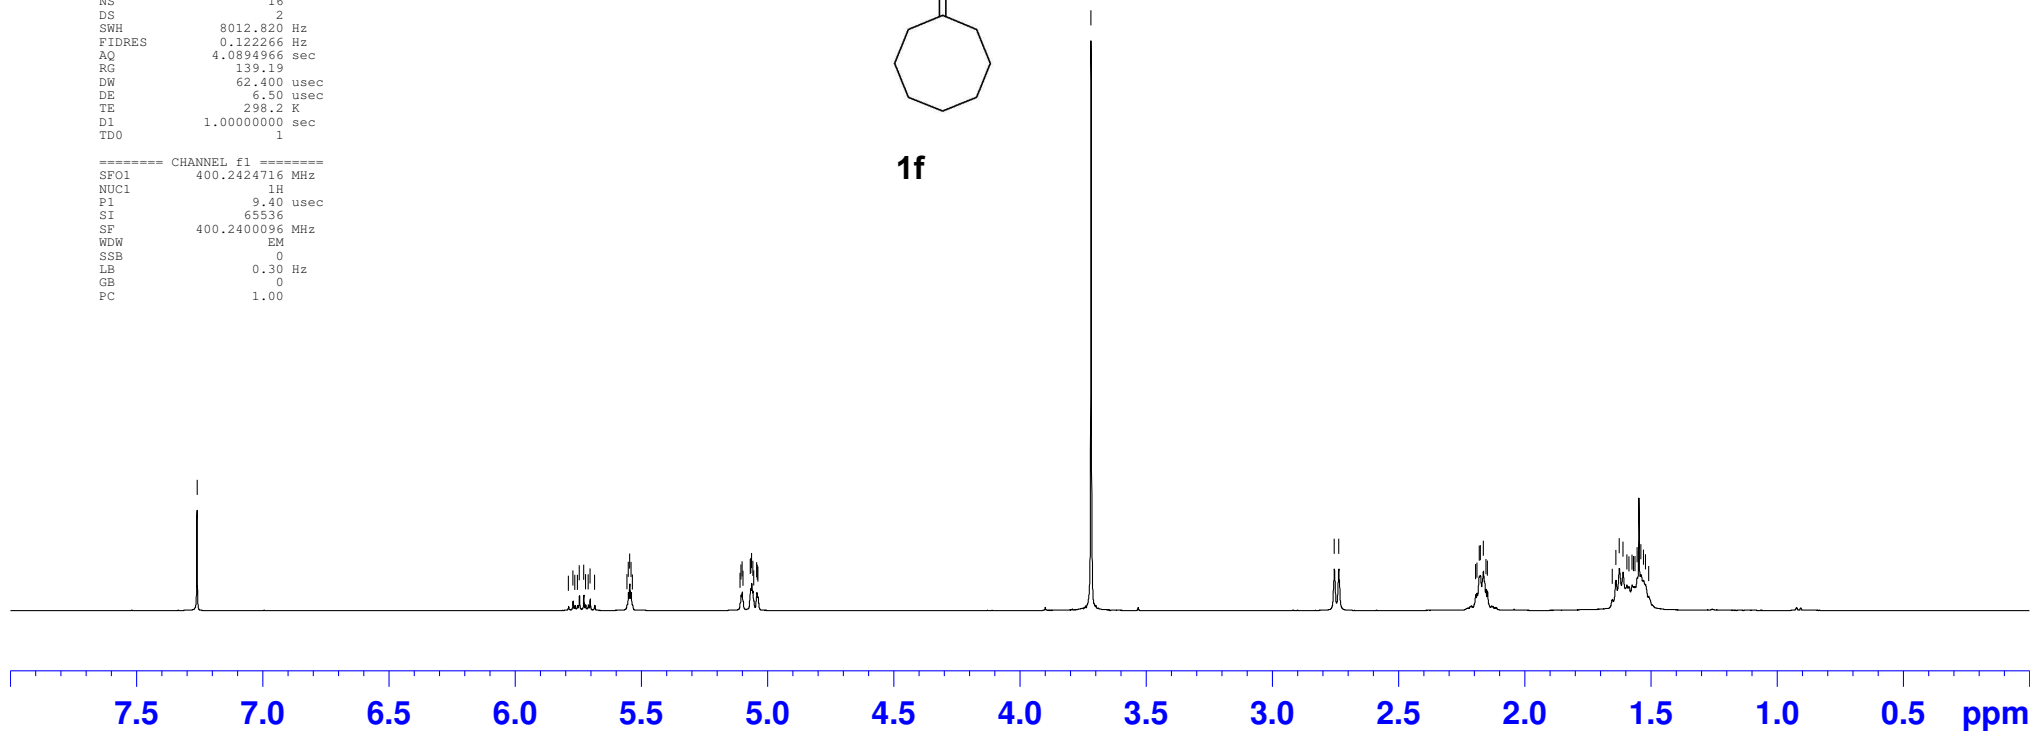

7.5 7.0 6.5 6.0 5.5 5.0 4.5 4.0 3.5 3.0 2.5 2.0 1.5 1.0 0.5 ppm

NAME TJ-20140901-E-1014-co-enallene-fracl6-26  
 EXPNO 13  
 PROCNO 1  
 Date\_ 20140902  
 Time 0.04  
 INSTRUM spect  
 PROBHD 5 mm PABBO BB/  
 PULPROG zgpg30  
 TD 65536  
 SOLVENT CDCl3  
 NS 4096  
 DS 4  
 SWH 24038.461 Hz  
 FIDRES 0.366798 Hz  
 AQ 1.3631988 sec  
 RG 191.9  
 DW 20.800 usec  
 DE 6.50 usec  
 TE 298.1 K  
 D1 2.00000000 sec  
 D11 0.03000000 sec  
 TD0 1

===== CHANNEL f1 =====  
 SF01 100.6504912 MHz  
 NUC1 13C  
 P1 9.20 usec  
 SI 32768  
 SP 100.6404135 MHz  
 WDW EM  
 SSB 0  
 LB 1.00 Hz  
 GB 0  
 PC 1.40

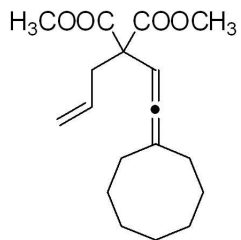

**1f**

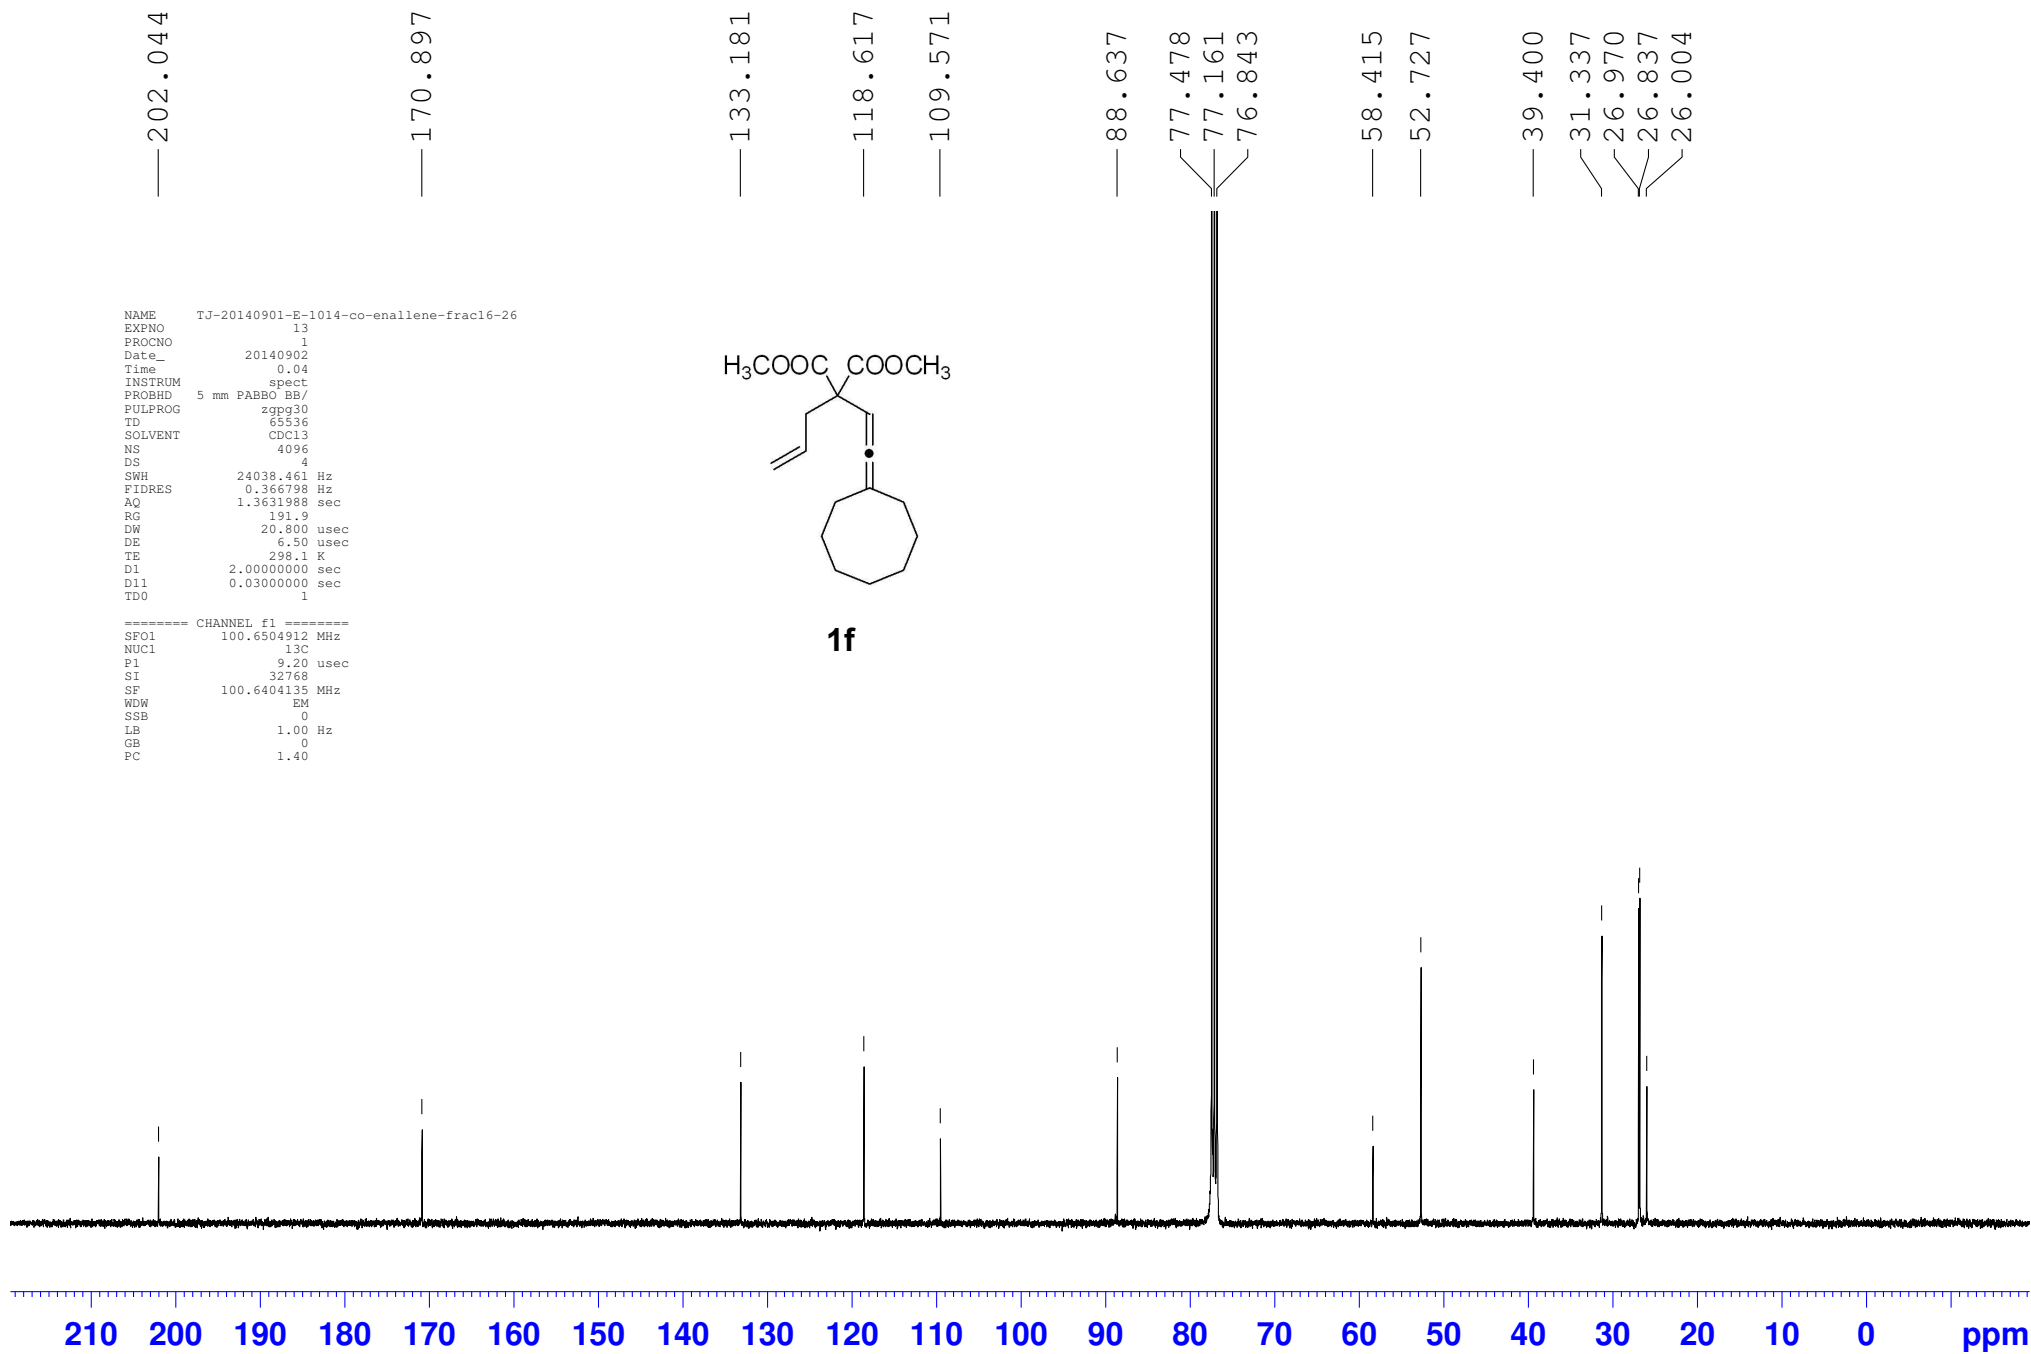

NAME 500M-TJ-20140723-E-958-HMe-enallene-prod  
 EXPNO 1  
 PROCNO 1  
 Date\_ 20140723  
 Time 9.19  
 INSTRUM spect  
 PROBHD 5 mm PABBO BB-  
 PULPROG zg30  
 TD 65536  
 SOLVENT CDCl3  
 NS 8  
 DS 0  
 SWH 8012.820 Hz  
 FIDRES 0.122266 Hz  
 AQ 4.0894966 sec  
 RG 161  
 DW 62.400 usec  
 DE 6.00 usec  
 TE 298.2 K  
 D1 2.00000000 sec  
 TDO 1

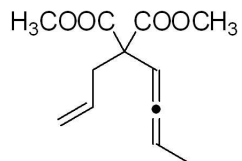

**1g**

===== CHANNEL f1 =====  
 NUC1 1H  
 P1 11.80 usec  
 PL1 2.00 dB  
 PL1W 15.76968765 W  
 SF01 500.1325007 MHz  
 SI 32768  
 SF 500.1300130 MHz  
 WDW EM  
 SSB 0  
 LB 0.30 Hz  
 GB 0  
 PC 1.00

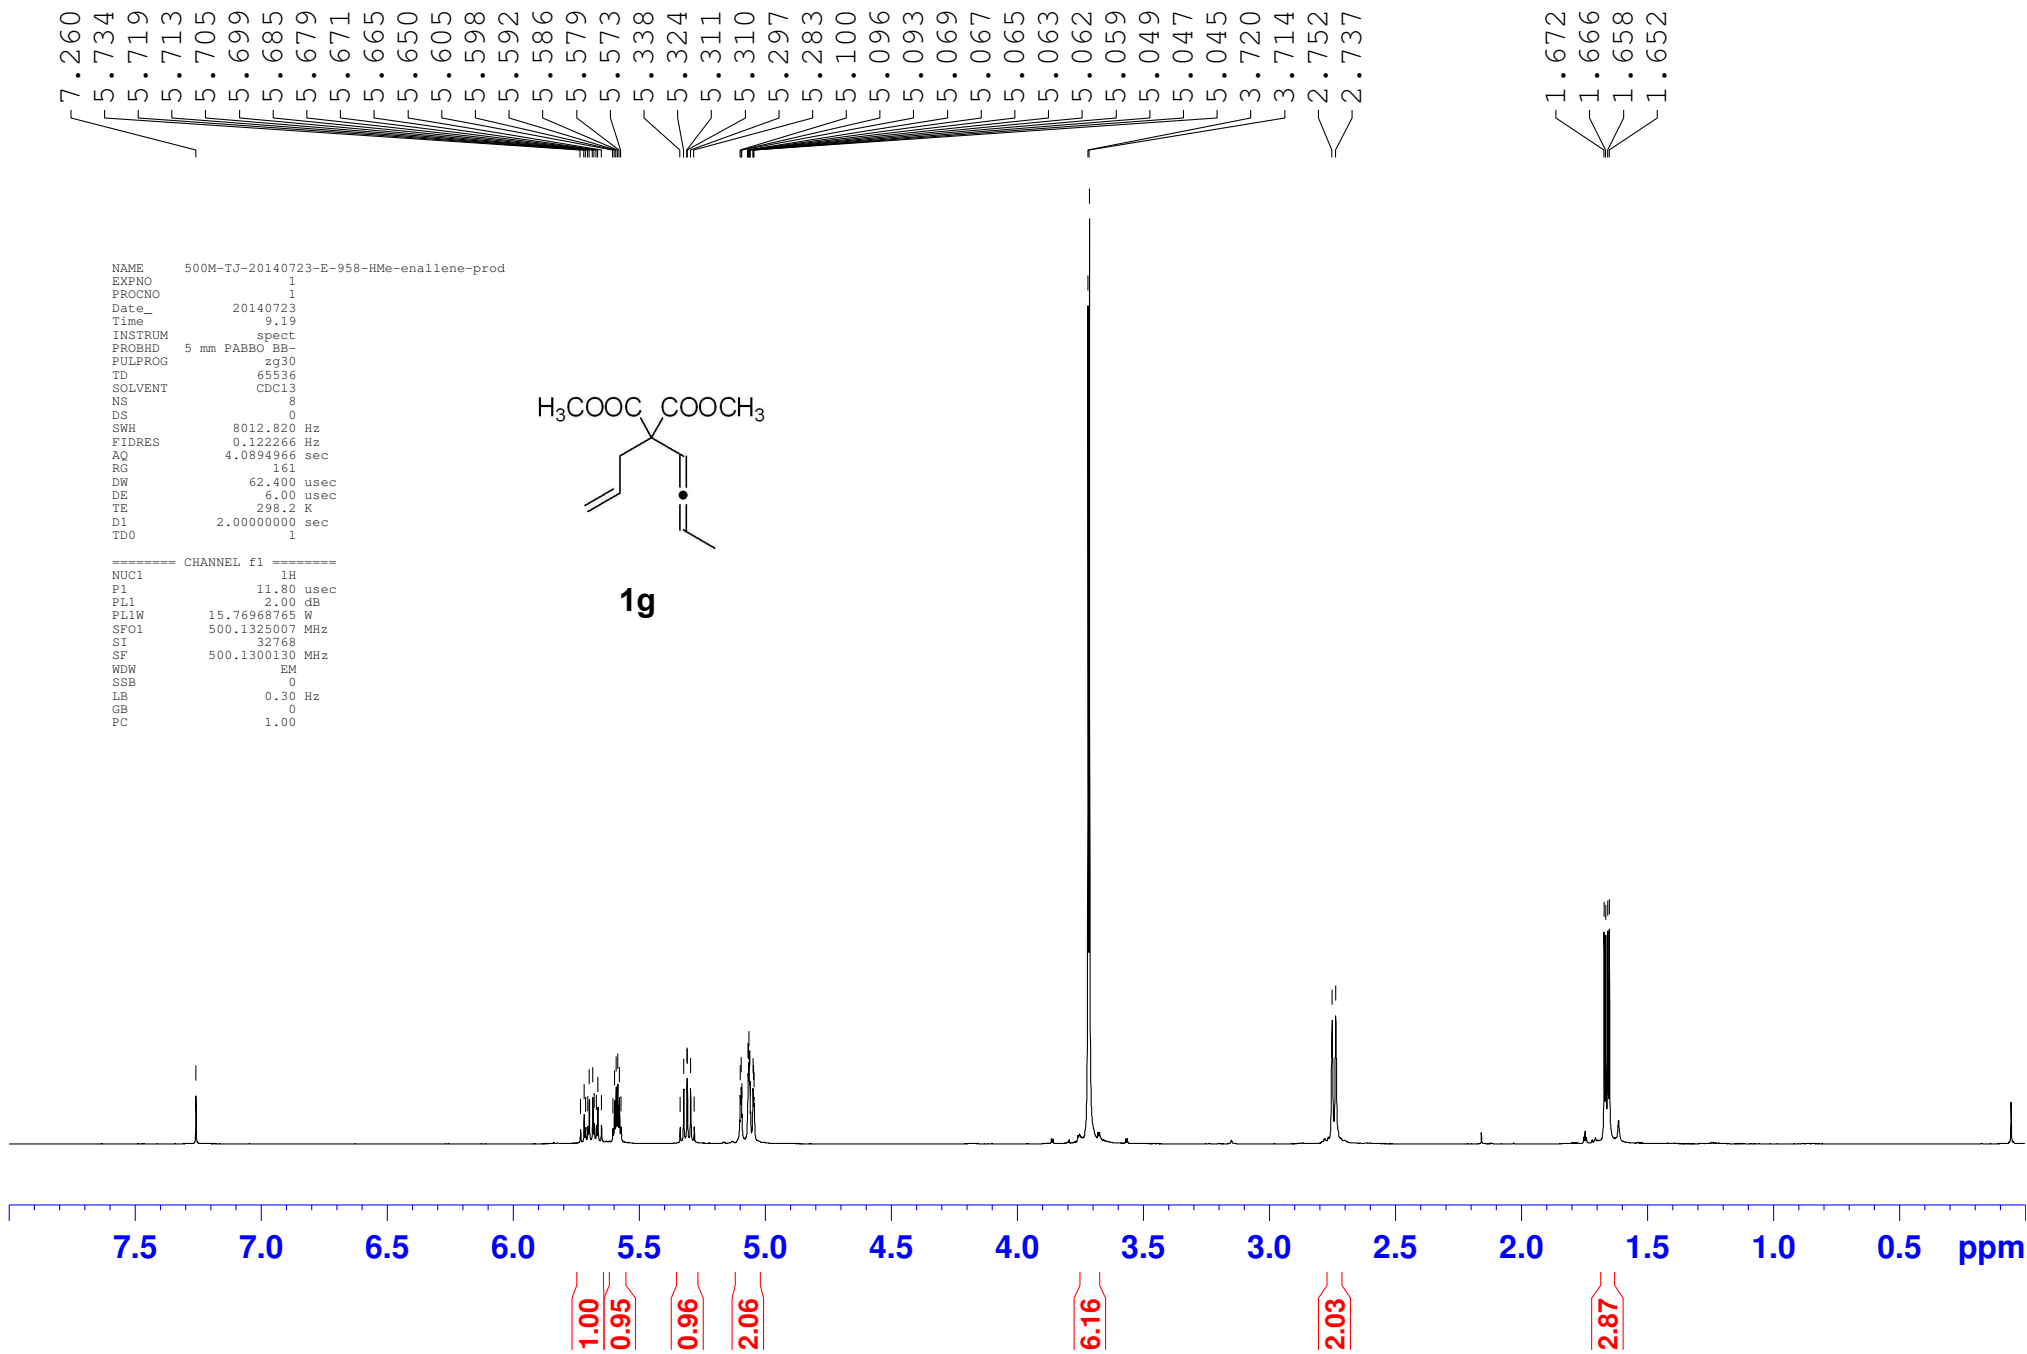

— 204.537

170.552  
170.483

— 132.786

— 118.908

90.318  
89.842

77.414  
77.160  
76.906

58.048  
52.786  
52.770

— 38.683

— 13.883

```

NAME      500M-TJ-20140723-E-958-HMe-enallene-prod
EXPNO     2
PROCNO    1
Date_     20140723
Time      9.22
INSTRUM   spect
PROBHD    5 mm PABBO BB-
PULPROG   zgpg30
TD        32768
SOLVENT   CDCl3
NS        32
DS        0
SWH       27573.529 Hz
FIDRES    0.841477 Hz
AQ        0.5942430 sec
RG        2050
DW        18.133 usec
DE        12.00 usec
TE        298.3 K
D1        2.0000000 sec
D11       0.03000000 sec
TD0       1

```

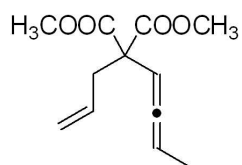

**1g**

```

===== CHANNEL f1 =====
NUC1      13C
P1        7.50 usec
PL1       0.00 dB
PL1W     83.89700317 W
SFO1     125.7703648 MHz

```

```

===== CHANNEL f2 =====
CPDPRG2   waltz16
NUC2      1H
PCPD2     80.00 usec
PL2       2.00 dB
PL12     18.62 dB
PL13     21.00 dB
PL2W     15.76968765 W
PL12W    0.34341794 W
PL13W    0.19852860 W
SFO2     500.1321306 MHz
SI        32768
SF        125.7577727 MHz
WDW       EM
SSB       0
LB        1.00 Hz
GB        0
PC        1.40

```

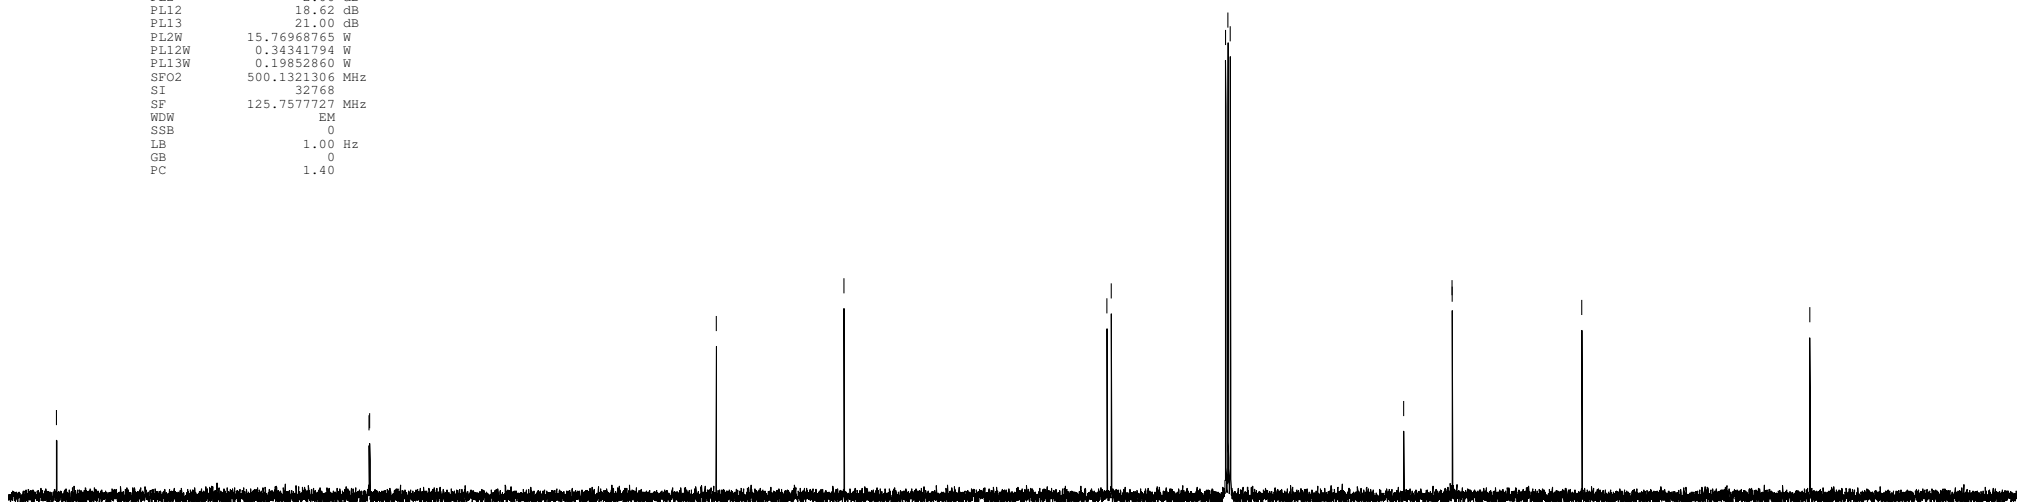

200 190 180 170 160 150 140 130 120 110 100 90 80 70 60 50 40 30 20 10 ppm



7.365  
7.334  
7.316  
7.312  
7.296  
7.260  
7.237  
7.234  
7.231  
7.221  
7.216  
7.198  
5.984  
5.977  
5.970  
5.963  
5.790  
5.772  
5.765  
5.754  
5.747  
5.730  
5.722  
5.712  
5.704  
5.686  
5.114  
5.110  
5.106  
5.102  
5.083  
5.081  
5.078  
5.072  
5.067  
5.063  
5.060  
5.058  
5.056  
5.053  
3.750  
3.696  
2.807  
2.789  
2.111  
2.104

NAME TJ-20140624-E-917-MePh-enallene  
EXPNO 10  
PROCNO 1  
Date\_ 20140624  
Time 19.39  
INSTRUM spect  
PROBHD 5 mm PABBO BB/  
PULPROG zg30  
TD 65536  
SOLVENT CDCl3  
NS 16  
DS 2  
SWH 8012.820 Hz  
FIDRES 0.122266 Hz  
AQ 4.0894966 sec  
RG 123.21  
DW 62.400 usec  
DE 6.50 usec  
TE 298.1 K  
D1 1.00000000 sec  
TD0 1

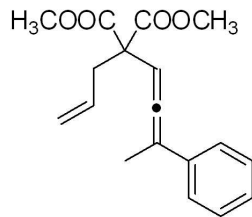

1h

----- CHANNEL f1 -----  
SF01 400.2324716 MHz  
NUC1 1H  
P1 9.40 usec  
SI 65536  
SF 400.2300097 MHz  
WDW EM  
SSB 0  
LB 0.30 Hz  
GB 0  
PC 1.00

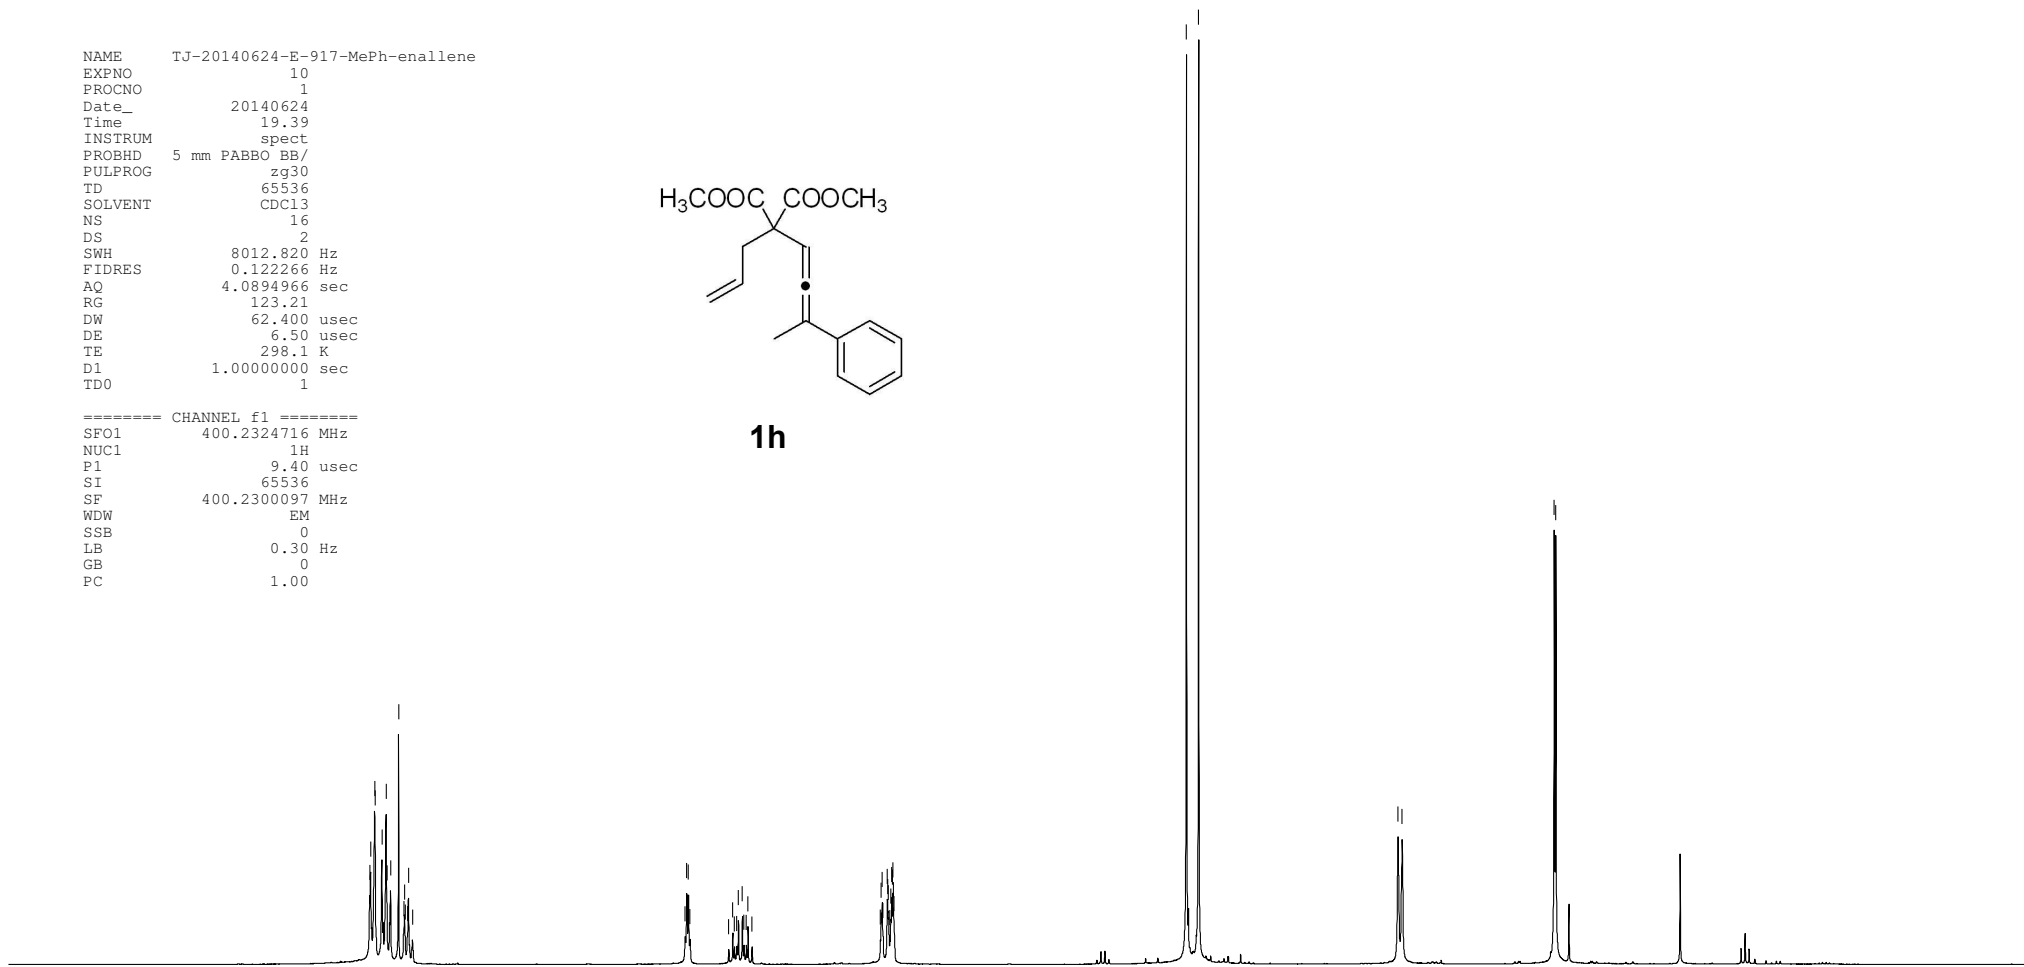

8.5 8.0 7.5 7.0 6.5 6.0 5.5 5.0 4.5 4.0 3.5 3.0 2.5 2.0 1.5 1.0 0.5 ppm

2.07  
2.04  
0.96  
0.90  
1.02  
2.01  
3.03  
2.92  
2.00  
3.01

—204.390

<170.501  
170.461

<136.053  
132.774  
128.514  
127.313  
125.985  
119.128

—105.173

—92.582

<77.479  
77.161  
76.844

—58.827  
<52.854  
52.819

—39.321

—16.766

```

NAME      TJ-20140624-E-917-MePh-enallene
EXPNO     11
PROCNO    1
Date_     20140625
Time      4.08
INSTRUM   spect
PROBHD    5 mm PABBO BB/
PULPROG   zgpg30
TD         65536
SOLVENT   CDCl3
NS         1024
DS         4
SWH       24038.461 Hz
FIDRES    0.366798 Hz
AQ         1.3631988 sec
RG         191.9
DW         20.800 usec
DE         6.50 usec
TE         298.1 K
D1         2.00000000 sec
D11        0.03000000 sec
TD0        1

```

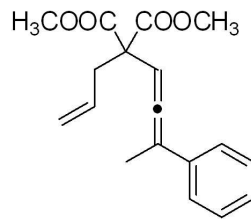

**1h**

```

===== CHANNEL f1 =====
SFO1      100.6479769 MHz
NUC1       13C
P1         9.20 usec
SI         32768
SF         100.6378990 MHz
WDW        EM
SSB         0
LB         1.00 Hz
GB         0
PC         1.40

```

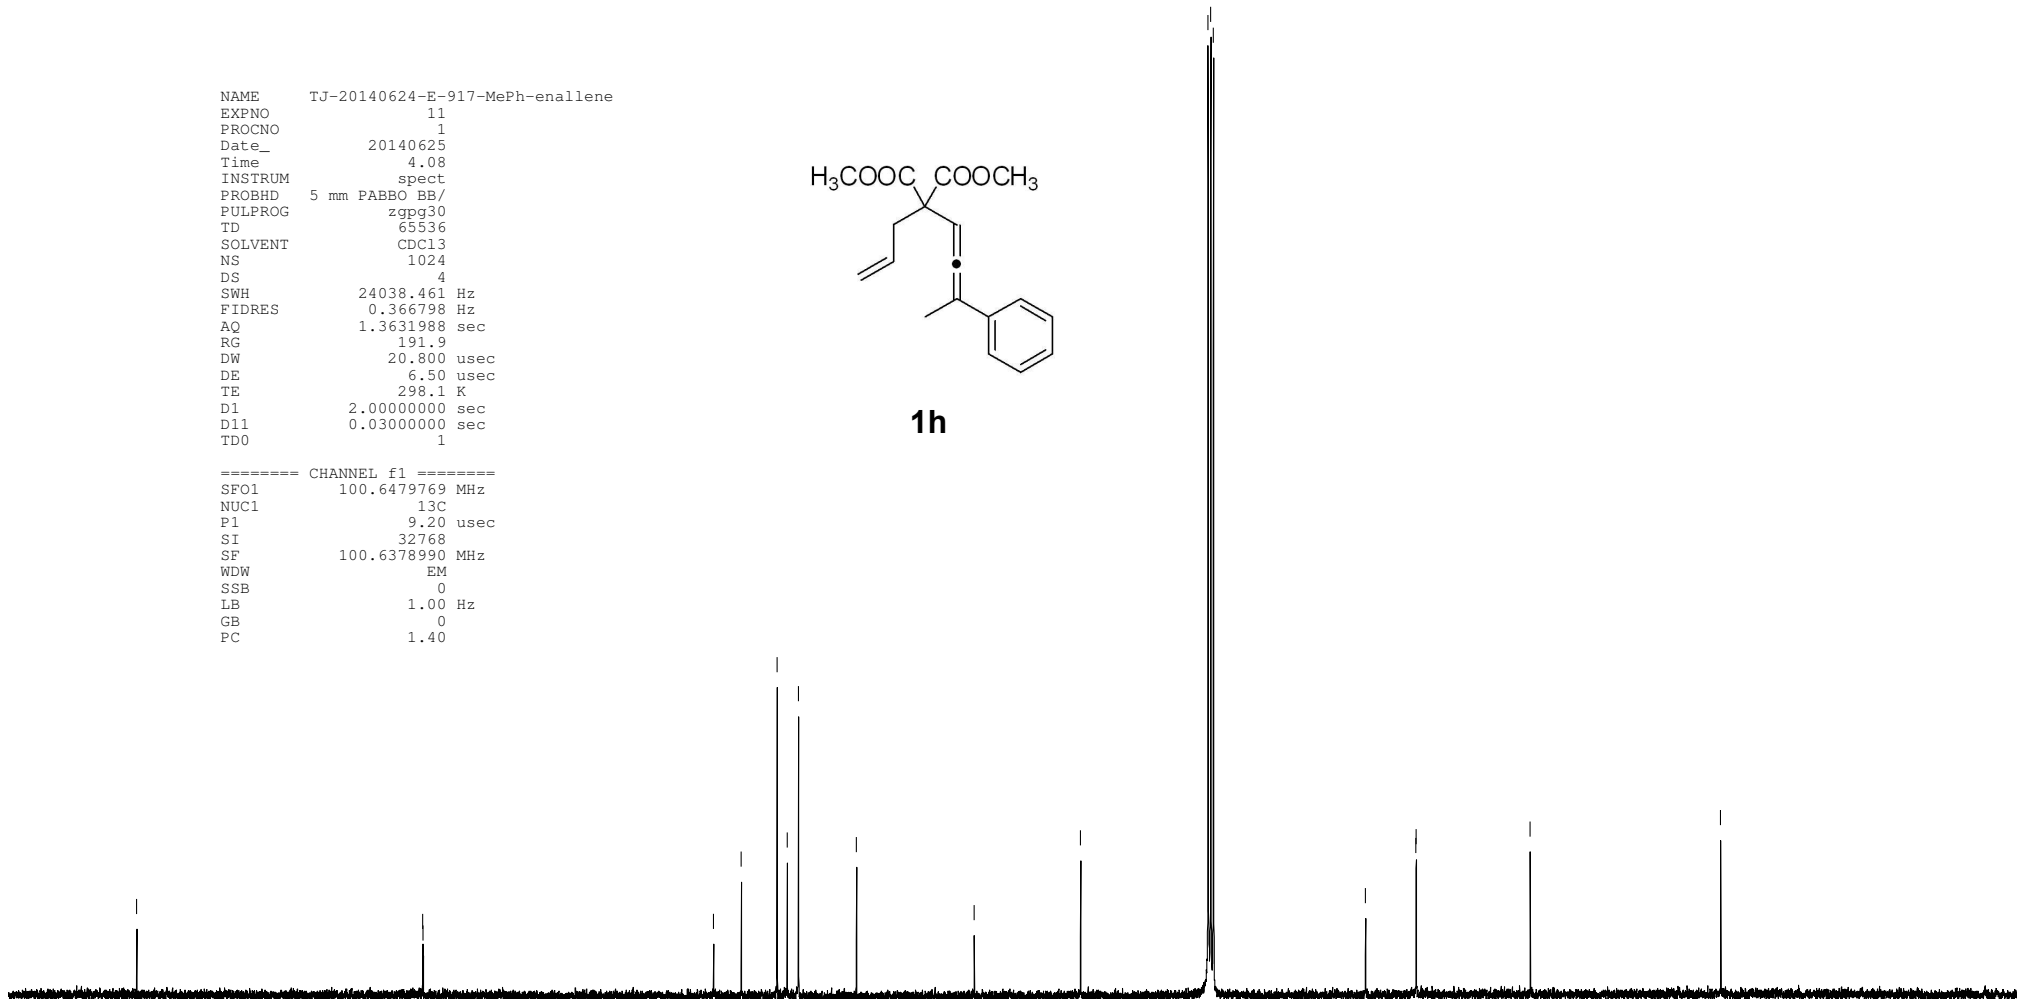

210 200 190 180 170 160 150 140 130 120 110 100 90 80 70 60 50 40 30 20 10 0 ppm

7.260  
5.884  
5.877  
5.865  
5.859  
5.841  
5.835  
5.823  
5.816  
5.798  
5.144  
5.141  
5.139  
5.136  
5.132  
5.104  
5.102  
5.098  
5.093  
5.090  
5.079  
5.076  
5.074  
4.864  
4.859  
4.853  
4.848  
4.843  
3.658  
3.644  
3.630  
3.616  
3.613  
3.596  
3.585  
3.568  
2.212  
2.209  
2.196  
2.193  
2.125  
2.120  
2.113  
2.107  
2.023  
2.007  
1.992  
1.647  
1.644  
1.637  
1.631  
1.619  
1.561  
1.542  
1.530  
1.523  
1.517  
1.513  
1.502

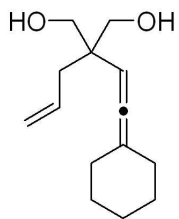

S1

```

NAME      TJ-20141106-E-1022-cy-LAH-frac
EXPNO     10
PROCNO    1
Date_     20141106
Time      10.27
INSTRUM   spect
PROBHD    5 mm PABBO BB-
PULPROG   zg30
TD         65536
SOLVENT   CDC13
NS         16
DS         2
SWH        8223.685 Hz
FIDRES     0.125483 Hz
AQ         3.9846387 sec
RG         912
DW         60.800 usec
DE         6.50 usec
TE         673.2 K
D1         1.00000000 sec
TD0        1
  
```

```

===== CHANNEL f1 =====
NUC1      1H
P1         8.90 usec
PL1       -4.00 dB
PL1W      24.73352814 W
SFO1      400.1324710 MHz
SI         32768
SF         400.1300101 MHz
WDW        EM
SSB        0
LB         0.30 Hz
GB         0
PC         1.00
  
```

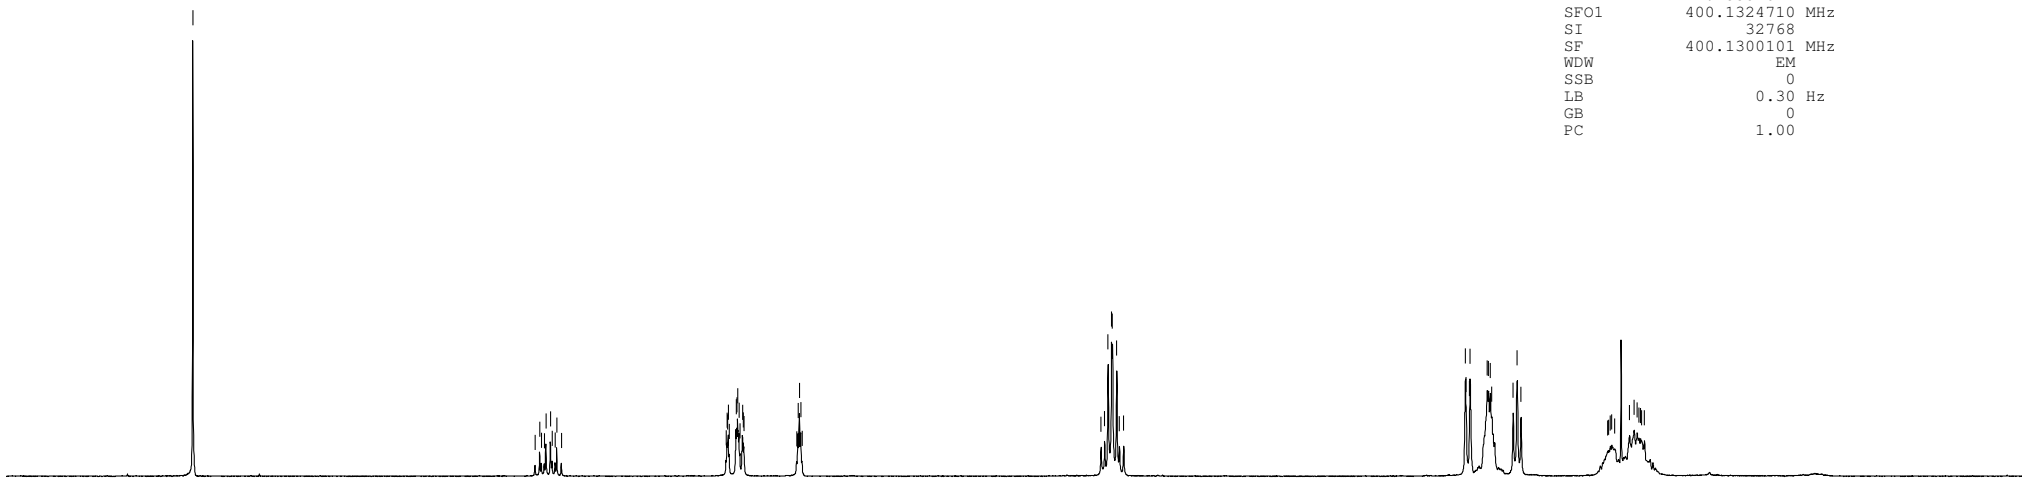

7.5 7.0 6.5 6.0 5.5 5.0 4.5 4.0 3.5 3.0 2.5 2.0 1.5 1.0 0.5 ppm

1.00 2.03 0.97 4.05 2.02 4.02 2.01 2.02 4.22

NAME TJ-20141106-E-1022-cy-LAH-frac  
 EXPNO 20  
 PROCNO 1  
 Date\_ 20141110  
 Time 23.03  
 INSTRUM spect  
 PROBHD 5 mm PABBO BB-  
 PULPROG zgpg30  
 TD 65536  
 SOLVENT CDCl3  
 NS 3072  
 DS 4  
 SWH 24038.461 Hz  
 FIDRES 0.366798 Hz  
 AQ 1.3631988 sec  
 RG 2050  
 DW 20.800 usec  
 DE 51.93 usec  
 TE 298.2 K  
 D1 2.00000000 sec  
 D11 0.03000000 sec  
 TD0 1

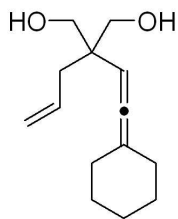

**S1**

===== CHANNEL f1 =====  
 NUC1 13C  
 P1 6.43 usec  
 PL1 -3.00 dB  
 PL1W 69.66502380 W  
 SFO1 100.6228298 MHz

===== CHANNEL f2 =====  
 CPDPRG2 waltz16  
 NUC2 1H  
 PCPD2 80.00 usec  
 PL2 16.00 dB  
 PL12 15.00 dB  
 PL13 15.00 dB  
 PL2W 0.24733528 W  
 PL12W 0.31137666 W  
 PL13W 0.31137666 W  
 SFO2 400.1316005 MHz  
 SI 32768  
 SF 100.6127542 MHz  
 WDW EM  
 SSB 0  
 LB 1.00 Hz  
 GB 0  
 PC 1.40

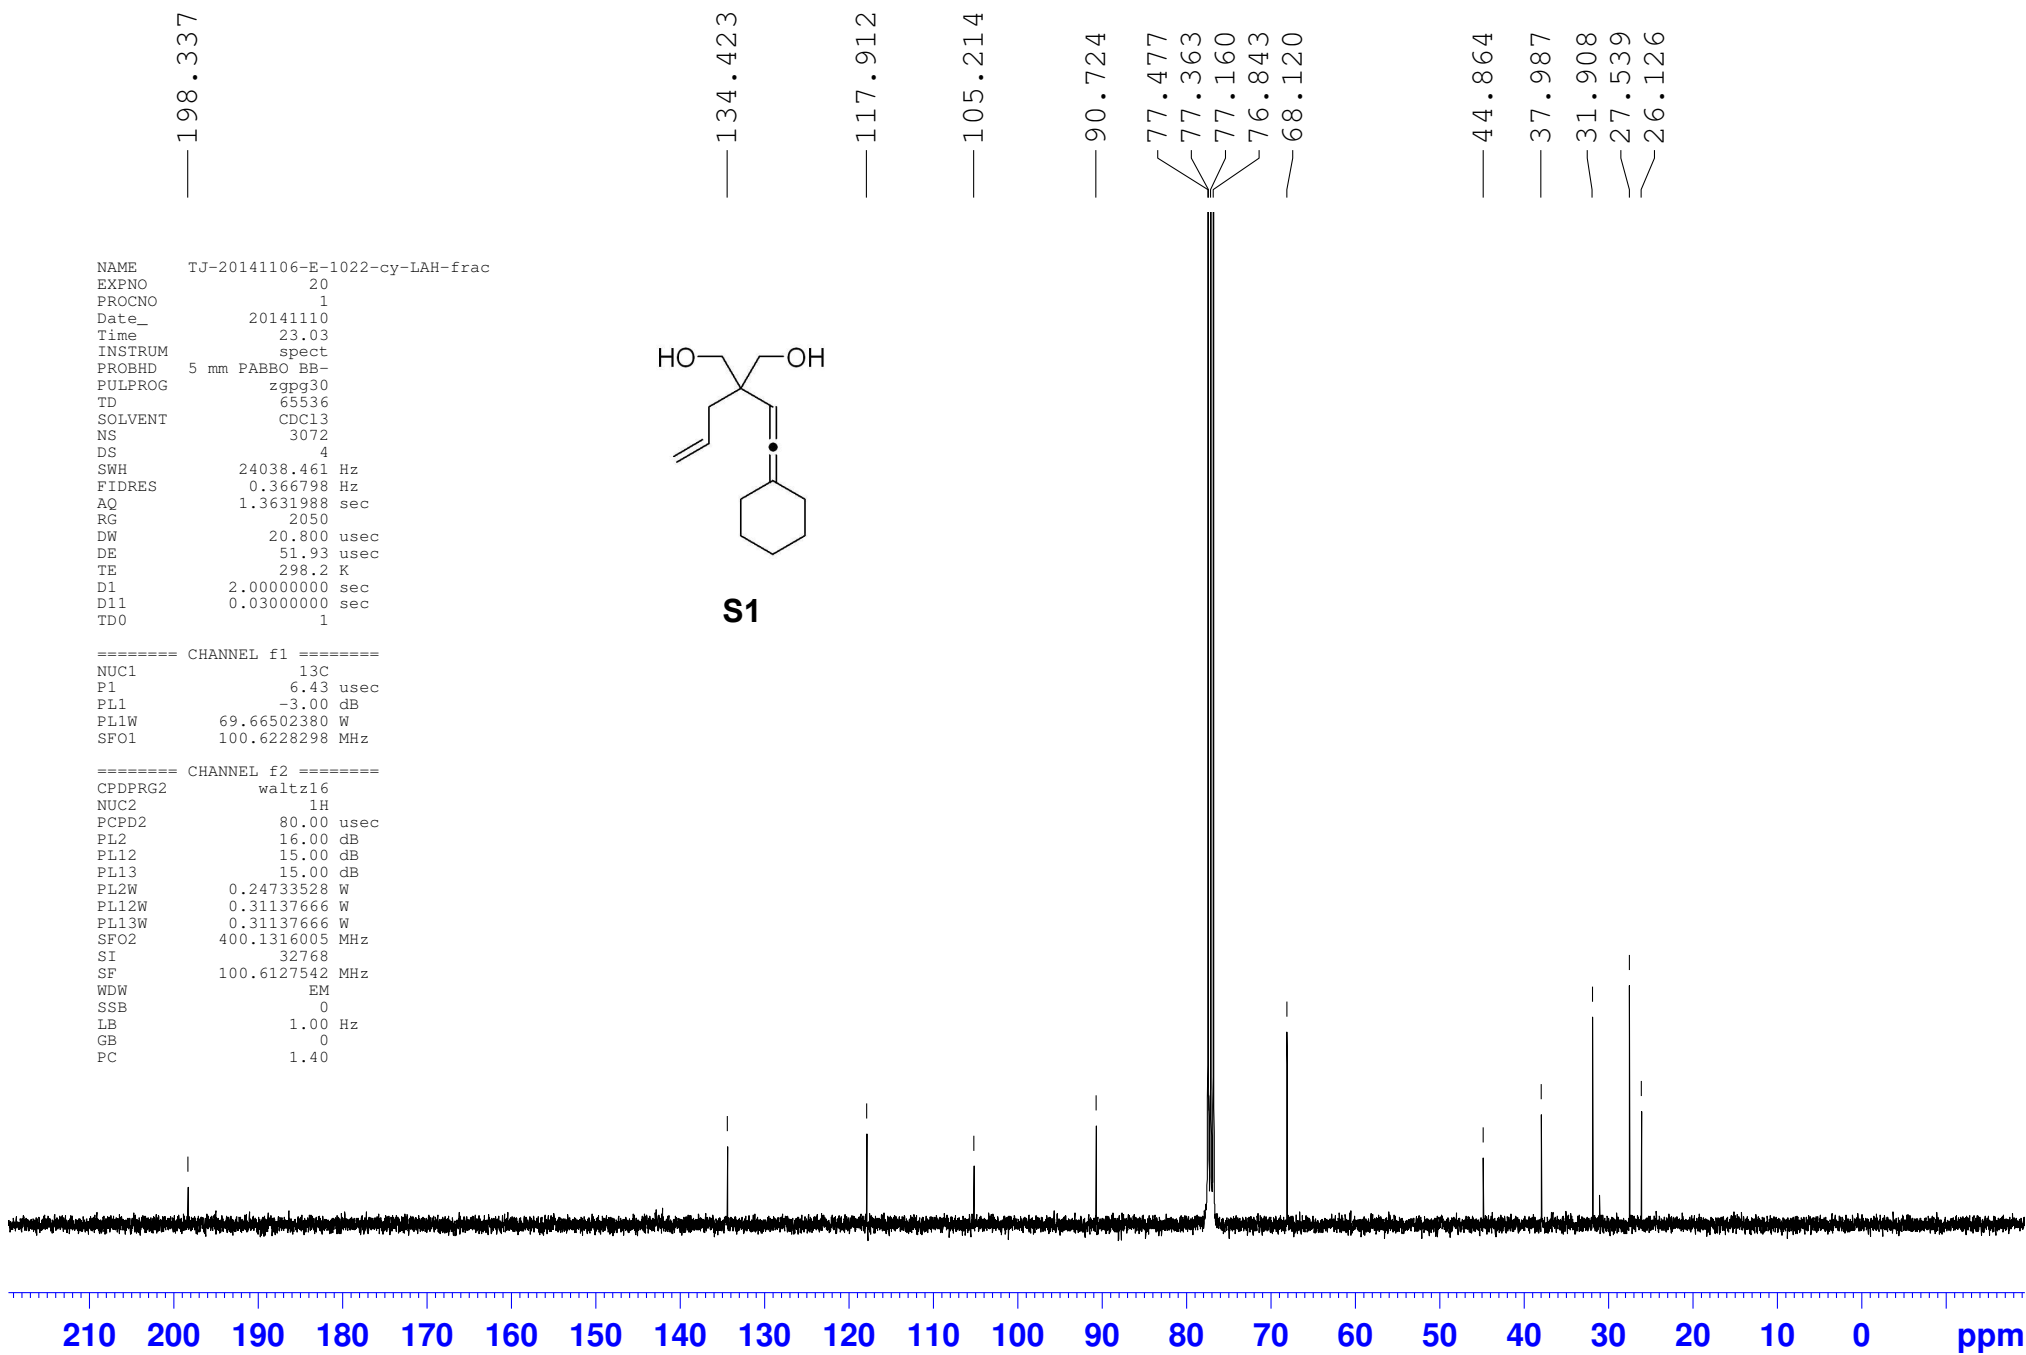

7.260  
5.843  
5.836  
5.824  
5.817  
5.800  
5.793  
5.782  
5.775  
5.757  
5.143  
5.139  
5.137  
5.134  
5.130  
5.109  
5.106  
5.104  
5.101  
5.097  
5.094  
5.091  
5.088  
5.081  
5.079  
5.075  
4.838  
4.832  
4.827  
4.821  
4.816  
3.711  
3.681  
3.587  
3.557  
2.365  
2.347  
2.146  
2.141  
2.128  
2.118  
2.112  
2.108  
2.101  
2.087  
2.081  
1.654  
1.651  
1.646  
1.640  
1.634  
1.621  
1.559  
1.548  
1.529  
1.507  
1.499  
1.424  
1.420

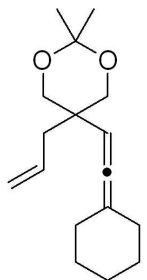

1m

```

NAME TJ-20141207-F-1041-X-protect-workup-crude
EXPNO 10
PROCNO 1
Date_ 20141207
Time 16.44
INSTRUM spect
PROBHD 5 mm PABBO BB-
PULPROG zg30
TD 65536
SOLVENT CDCl3
NS 16
DS 2
SWH 8223.685 Hz
FIDRES 0.125483 Hz
AQ 3.9846387 sec
RG 912
DW 60.800 usec
DE 6.50 usec
TE 298.2 K
D1 1.0000000 sec
TD0 1

```

```

===== CHANNEL f1 =====
NUC1 1H
P1 8.90 usec
PL1 -4.00 dB
PL1W 24.73352814 W
SFO1 400.1324710 MHz
SI 32768
SF 400.1300096 MHz
WDW EM
SSB 0
LB 0.30 Hz
GB 0
PC 1.00

```

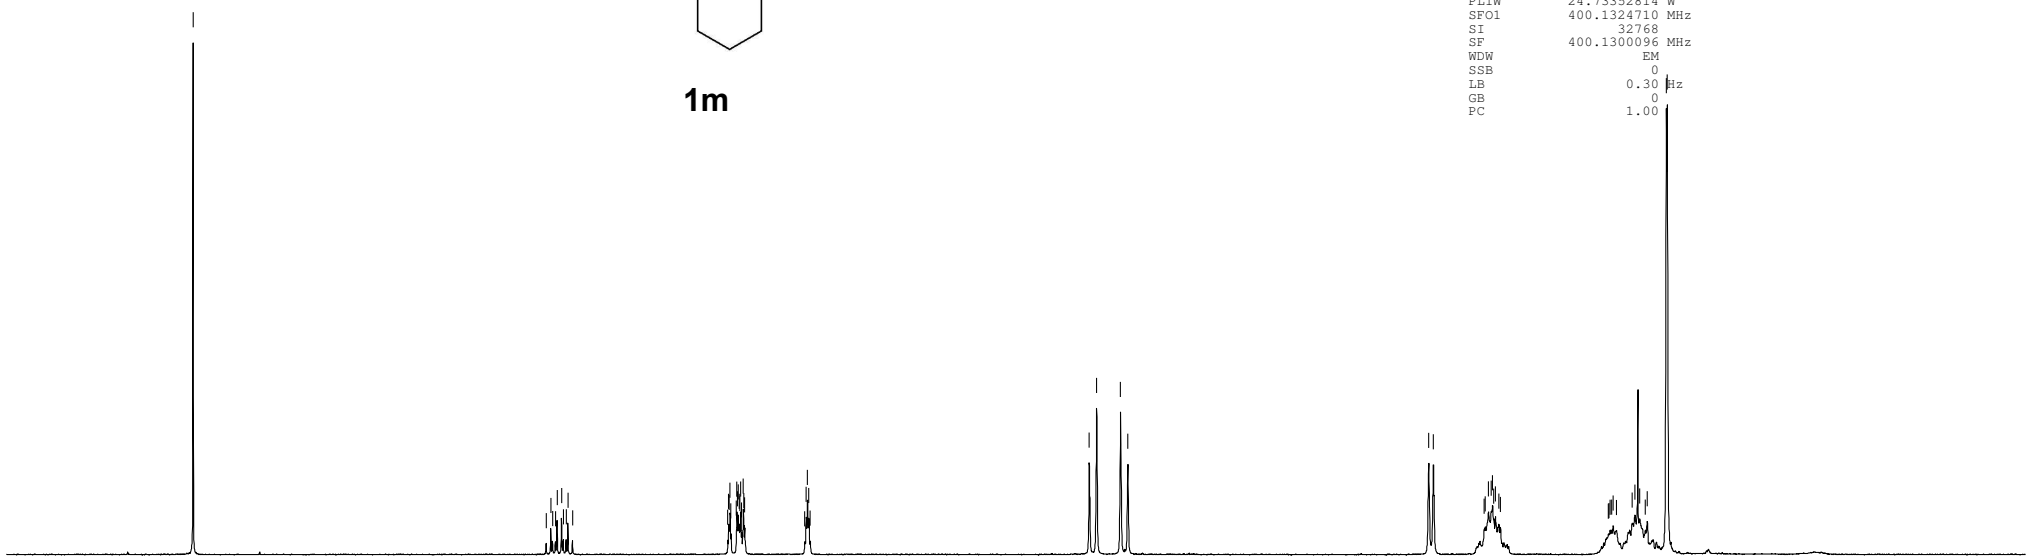

7.5 7.0 6.5 6.0 5.5 5.0 4.5 4.0 3.5 3.0 2.5 2.0 1.5 1.0 0.5 ppm

1.00 2.05 0.98 2.03 2.05 2.01 4.10 2.05 4.41 6.11

```

NAME TJ-20141207-F-1041-X-protect-workup-crude
EXPNO 12
PROCNO 1
Date_ 20141207
Time 22.06
INSTRUM spect
PROBHD 5 mm PABBO BB-
PULPROG zgpg30
TD 65536
SOLVENT CDCl3
NS 2048
DS 4
SWH 24038.461 Hz
FIDRES 0.366798 Hz
AQ 1.3631988 sec
RG 2050
DW 20.800 usec
DE 51.93 usec
TE 298.2 K
D1 2.0000000 sec
D11 0.0300000 sec
TDO 1

===== CHANNEL f1 =====
NUC1 13C
P1 6.43 usec
PL1 -3.00 dB
PL1W 69.66502380 W
SFO1 100.6228298 MHz

===== CHANNEL f2 =====
CPDPRG2 waltz16
NUC2 1H
PCPD2 80.00 usec
PL2 16.00 dB
PL12 15.00 dB
PL13 15.00 dB
PL2W 0.24733528 W
PL12W 0.31137666 W
PL13W 0.31137666 W
SFO2 400.1316005 MHz
SI 32768
SF 100.6127540 MHz
WDW EM
SSB 0
LB 1.00 Hz
GB 0
PC 1.40

```

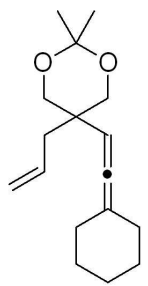

1m

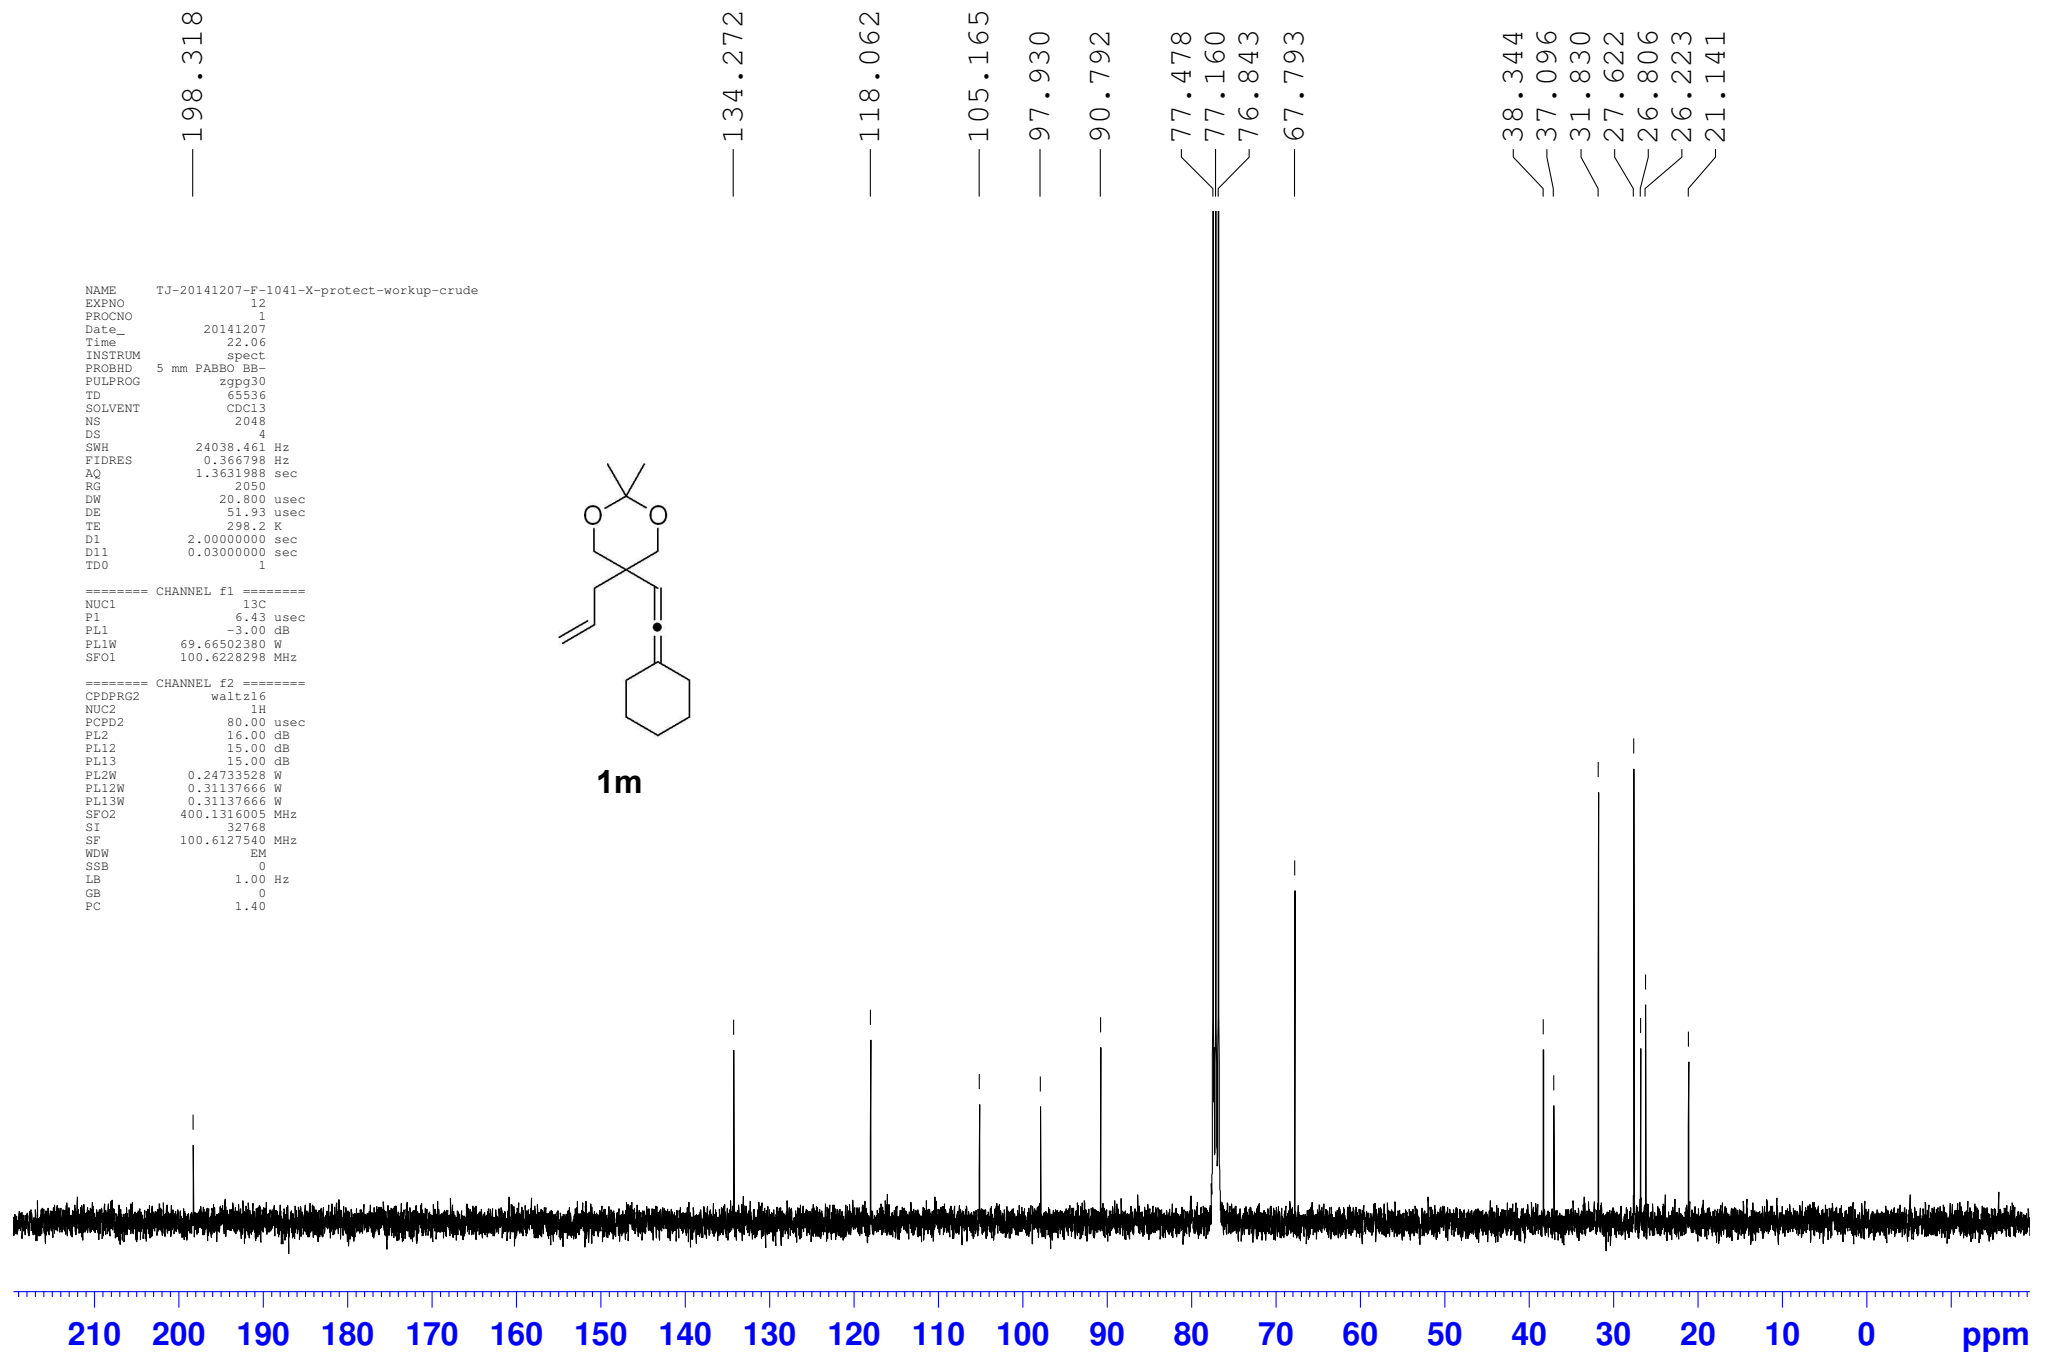

7.260  
7.202

NAME TJ-20140826-(S)-funkii-Pacid-re  
EXPNO 10  
PROCNO 1  
Date\_ 20140826  
Time 12.25  
INSTRUM spect  
PROBHD 5 mm PABBO BB/  
PULPROG zg30  
TD 65536  
SOLVENT CDCl3  
NS 16  
DS 2  
SWH 8012.820 Hz  
FIDRES 0.122266 Hz  
AQ 4.0894966 sec  
RG 96.29  
DW 62.400 usec  
DE 6.50 usec  
TE 298.2 K  
D1 1.00000000 sec  
TD0 1

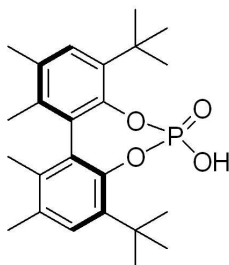

4a

==== CHANNEL f1 =====  
SFO1 400.2424716 MHz  
NUC1 1H  
P1 9.40 usec  
SI 65536  
SF 400.2400096 MHz  
WDW EM  
SSB 0  
LB 0.30 Hz  
GB 0  
PC 1.00

2.249  
1.828  
1.461

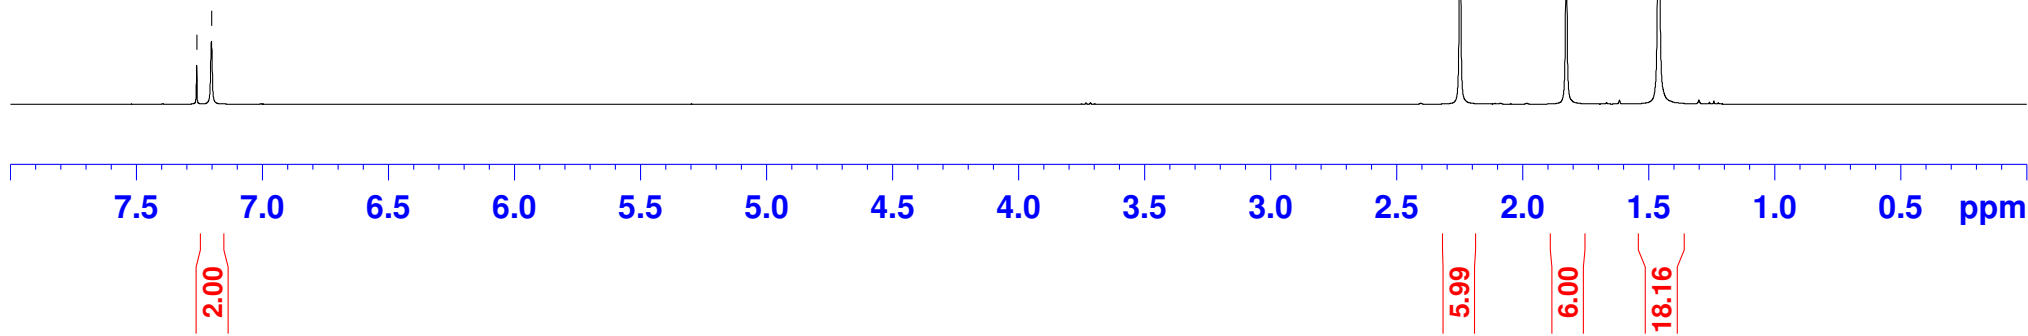

NAME TJ-20140826-(S)-funkii-Pacid-re  
 EXPNO 13  
 PROCNO 1  
 Date\_ 20140826  
 Time 12.53  
 INSTRUM spect  
 PROBHD 5 mm PABBO BB/  
 PULPROG zgpg30  
 TD 65536  
 SOLVENT CDCl3  
 NS 176  
 DS 4  
 SWH 24038.461 Hz  
 FIDRES 0.366798 Hz  
 AQ 1.3631988 sec  
 RG 191.9  
 DW 20.800 usec  
 DE 6.50 usec  
 TE 298.1 K  
 D1 2.00000000 sec  
 D11 0.03000000 sec  
 TDO 1

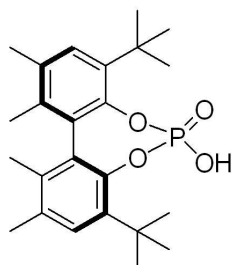

**4a**

===== CHANNEL f1 =====  
 SFO1 100.6504912 MHz  
 NUC1 13C  
 P1 9.20 usec  
 SI 32768  
 SF 100.6404139 MHz  
 WDW EM  
 SSB 0  
 LB 1.00 Hz  
 GB 0  
 PC 1.40

144.776  
 144.688  
 137.884  
 137.841  
 135.241  
 133.681  
 129.166  
 128.668

77.479  
 77.161  
 76.844

35.038  
 31.595

20.541  
 16.826

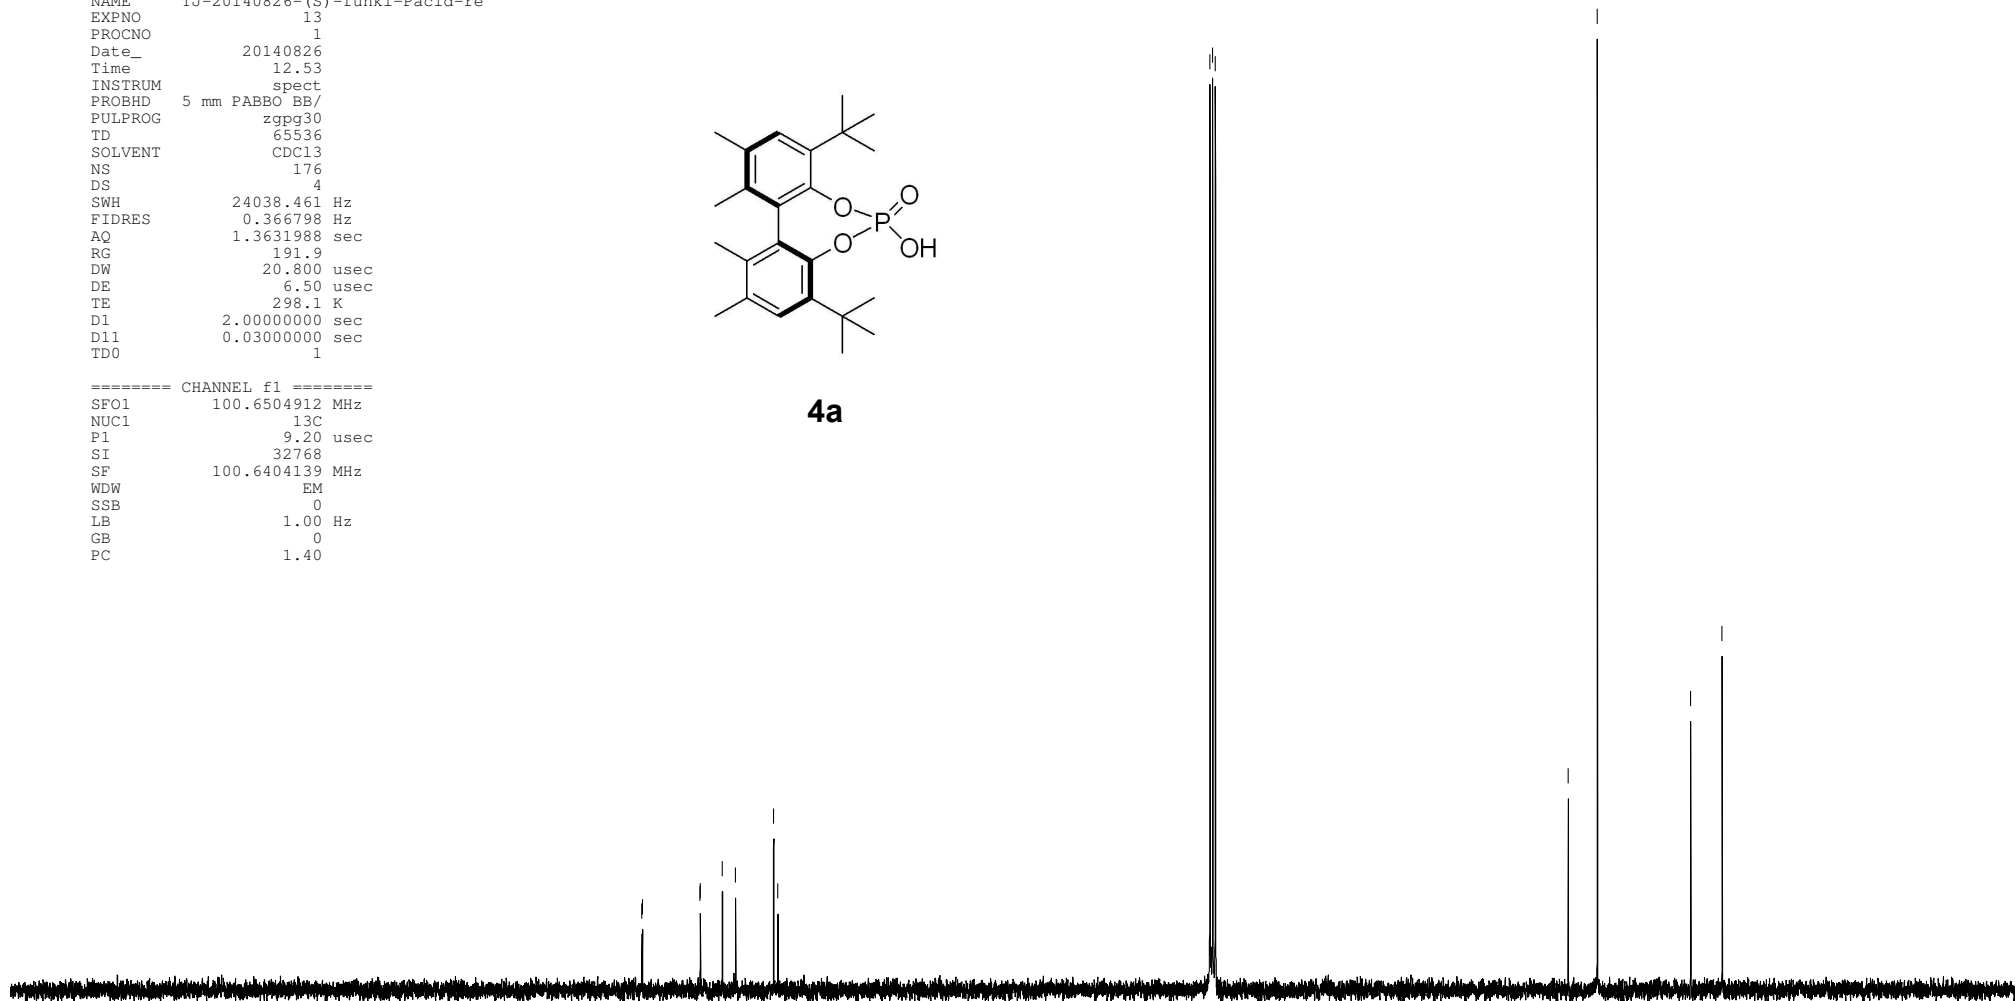

210 200 190 180 170 160 150 140 130 120 110 100 90 80 70 60 50 40 30 20 10 0 ppm



7.260  
7.152  
7.131  
6.834  
6.813

4.494

2.263

1.899

NAME TJ-20140210-D-777-chiral-AlCl3-recry-solid  
EXPNO 10  
PROCNO 1  
Date\_ 20140210  
Time 11.19  
INSTRUM spect  
PROBHD 5 mm PABBO BB/  
PULPROG zg30  
TD 65536  
SOLVENT CDCl3  
NS 16  
DS 2  
SWH 8012.820 Hz  
FIDRES 0.122266 Hz  
AQ 4.0894966 sec  
RG 152.22  
DW 62.400 usec  
DE 6.50 usec  
TE 298.2 K  
D1 1.00000000 sec  
TDO 1

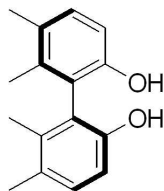

S3

==== CHANNEL f1 =====  
SFO1 400.2324716 MHz  
NUC1 1H  
P1 9.40 usec  
SI 65536  
SF 400.2300097 MHz  
WDW EM  
SSB 0  
LB 0.30 Hz  
GB 0  
PC 1.00

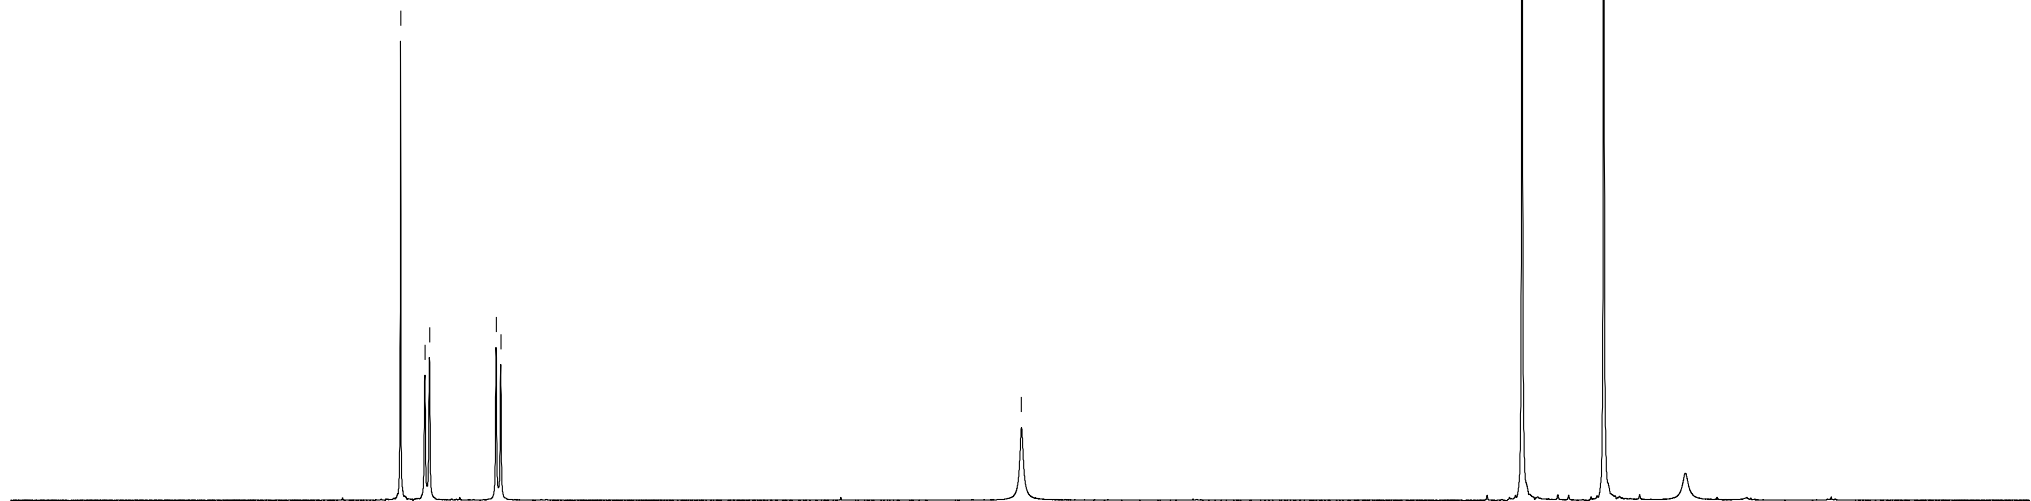

8.5 8.0 7.5 7.0 6.5 6.0 5.5 5.0 4.5 4.0 3.5 3.0 2.5 2.0 1.5 1.0 0.5 ppm

2.05  
2.00

1.91

6.04  
6.00

NAME TJ-20140210-D-777-chiral-AlCl3-recry-solid  
EXPNO 11  
PROCNO 1  
Date\_ 20140210  
Time 11.34  
INSTRUM spect  
PROBHD 5 mm PABBO BB/  
PULPROG zgpg30  
TD 65536  
SOLVENT CDCl3  
NS 176  
DS 4  
SWH 24038.461 Hz  
FIDRES 0.366798 Hz  
AQ 1.3631988 sec  
RG 191.9  
DW 20.800 usec  
DE 6.50 usec  
TE 298.2 K  
D1 2.0000000 sec  
D11 0.0300000 sec  
TDO 1

----- CHANNEL f1 -----  
SF01 100.6479769 MHz  
NUC1 13C  
P1 9.20 usec  
SI 32768  
SF 100.6378989 MHz  
WDW EM  
SSB 0  
LB 1.00 Hz  
GB 0  
PC 1.40

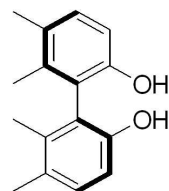

S3

— 151.943

— 137.075

— 131.489

— 129.375

— 120.349

— 112.769

77.478

77.160

76.843

— 19.960

— 16.467

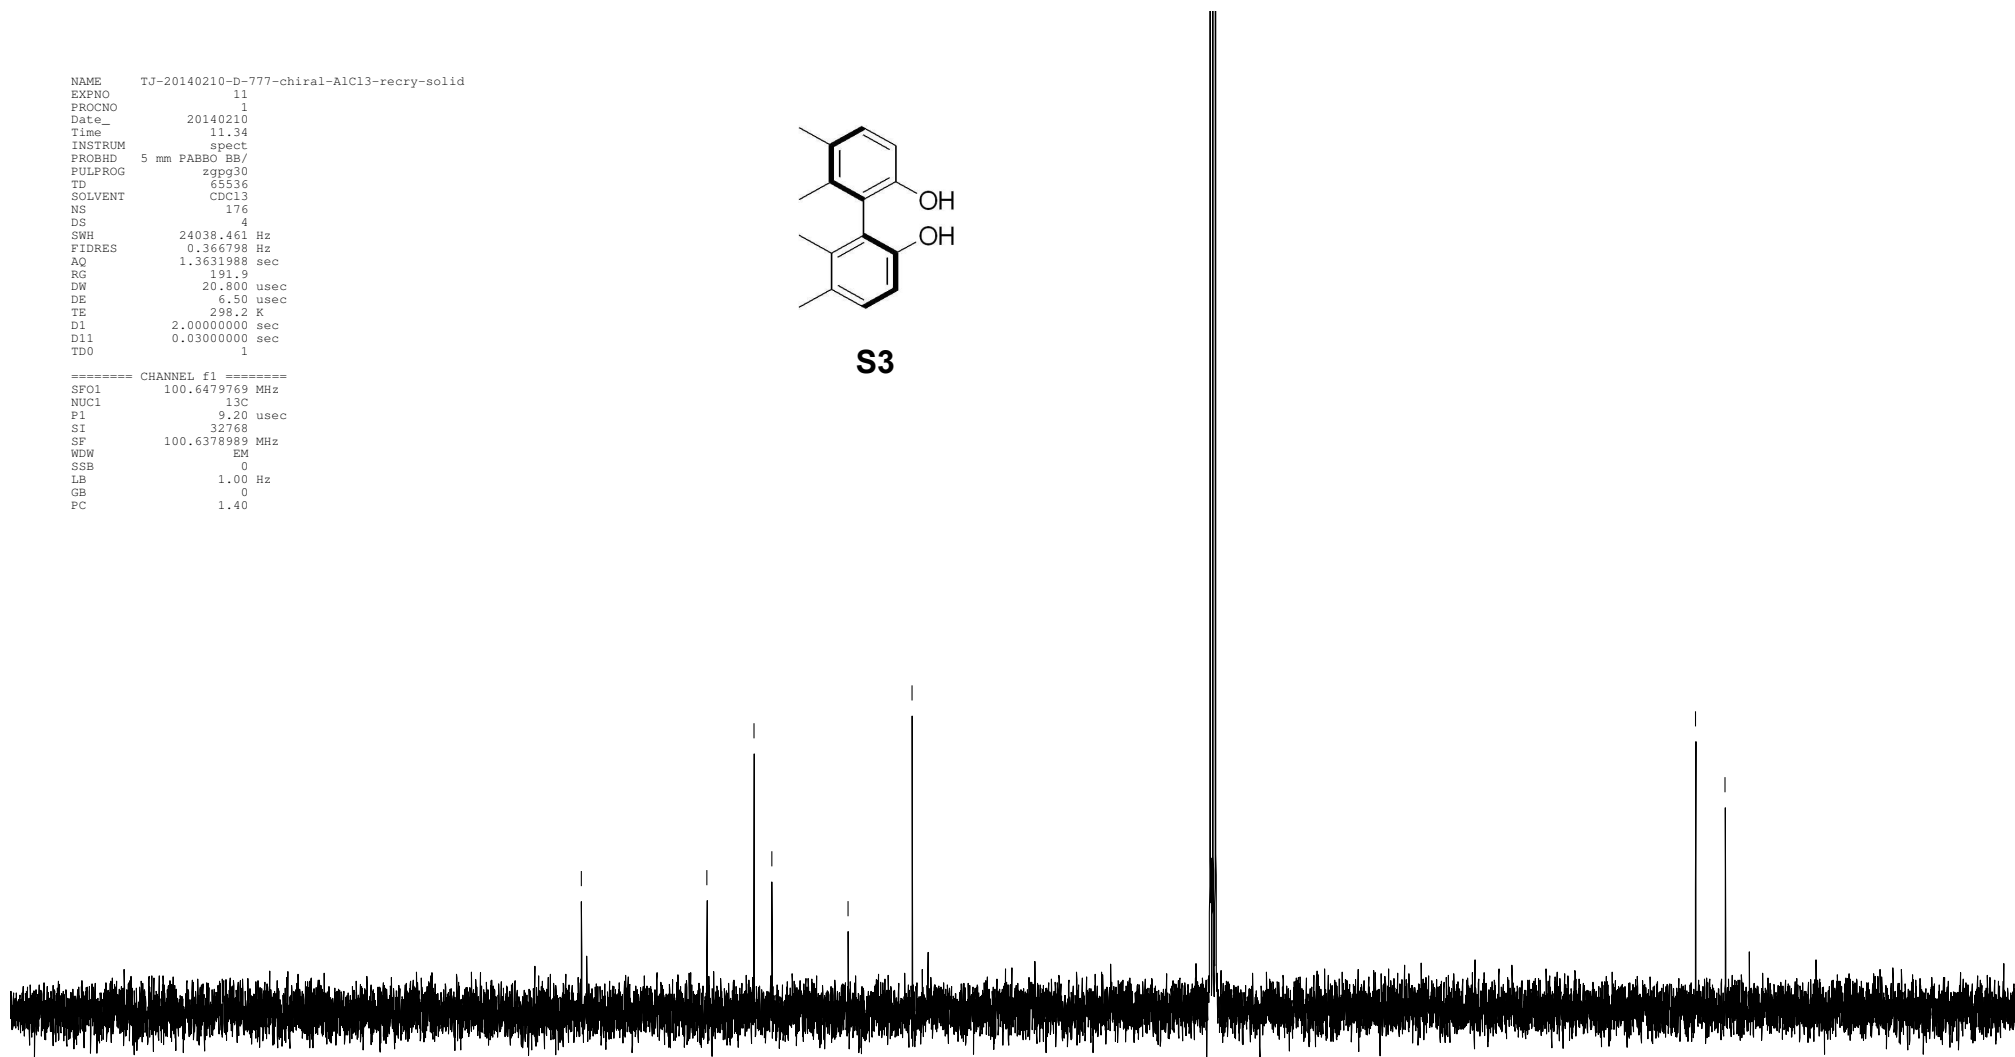

210 200 190 180 170 160 150 140 130 120 110 100 90 80 70 60 50 40 30 20 10 0 ppm

NAME 500M-TJ-20140205-D-764-de-tBu-funki-acid  
 EXPNO 1  
 PROCNO 1  
 Date\_ 20140205  
 Time 21.15  
 INSTRUM spect  
 PROBHD 5 mm PABBO BB-  
 PULPROG zg30  
 TD 65536  
 SOLVENT CDCl3  
 NS 12  
 DS 1  
 SWH 8012.820 Hz  
 FIDRES 0.122266 Hz  
 AQ 4.0894966 sec  
 RG 406  
 DW 62.400 usec  
 DE 6.00 usec  
 TE 298.2 K  
 D1 2.0000000 sec  
 TD0 1

===== CHANNEL f1 =====  
 NUC1 1H  
 P1 11.80 usec  
 PL1 2.00 dB  
 PLLW 15.76968765 W  
 SFO1 500.1325007 MHz  
 SI 32768  
 SF 500.1300128 MHz  
 WDW EM  
 SSB 0  
 LB 0.30 Hz  
 GB 0  
 PC 1.00

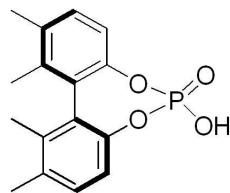

4c

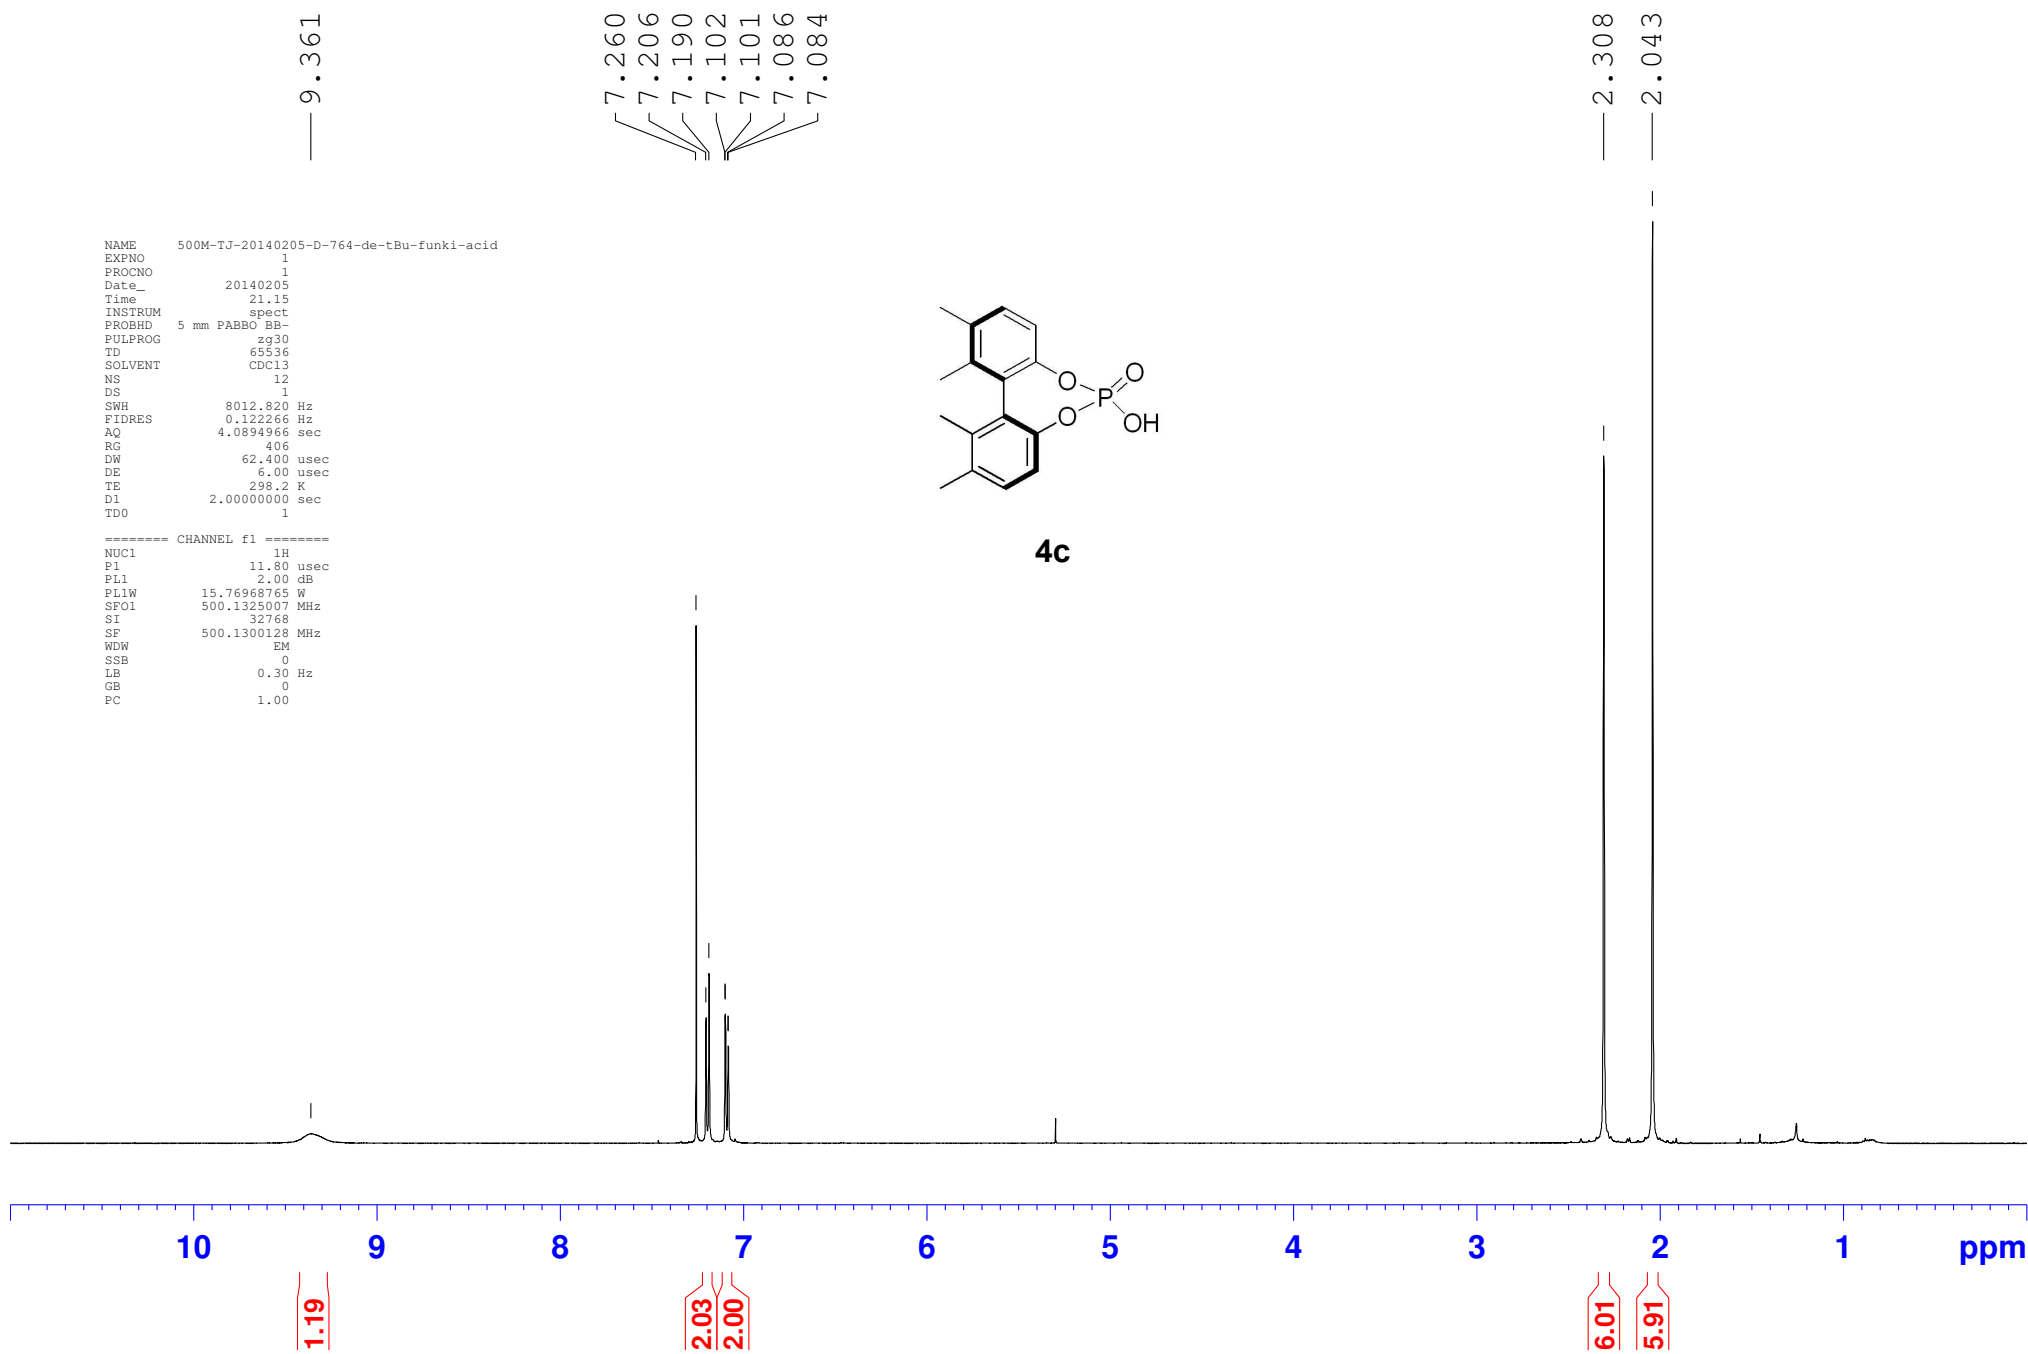

NAME 500M-TJ-20140205-D-764--de-tBu-funki-acid  
 EXPNO 2  
 PROCNO 1  
 Date\_ 20140205  
 Time 21.18  
 INSTRUM spect  
 PROBHD 5 mm PABBO BB-  
 PULPROG zgpg30  
 TD 32768  
 SOLVENT CDCl3  
 NS 950  
 DS 0  
 SWH 27573.529 Hz  
 FIDRES 0.841477 Hz  
 AQ 0.5942430 sec  
 RG 2050  
 DW 18.133 usec  
 DE 12.00 usec  
 TE 298.3 K  
 D1 2.00000000 sec  
 D11 0.03000000 sec  
 TD0 1

===== CHANNEL f1 =====  
 NUC1 13C  
 P1 7.50 usec  
 PL1 0.00 dB  
 PL1W 83.89700317 W  
 SFO1 125.7703648 MHz

===== CHANNEL f2 =====  
 CPDPRG2 waltz16  
 NUC2 1H  
 PCPD2 80.00 usec  
 PL2 2.00 dB  
 PL12 18.62 dB  
 PL13 21.00 dB  
 PL2W 15.76968765 W  
 PL12W 0.34341794 W  
 PL13W 0.19852860 W  
 SFO2 500.1321306 MHz  
 SI 32768  
 SF 125.7577711 MHz  
 WDW EM  
 SSB 0  
 LB 1.00 Hz  
 GB 0  
 PC 1.40

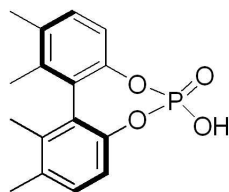

4c

146.725  
 146.655  
 137.593  
 135.221  
 135.206  
 130.629  
 127.105  
 118.286  
 118.256  
 77.413  
 77.159  
 76.905  
 20.442  
 17.741

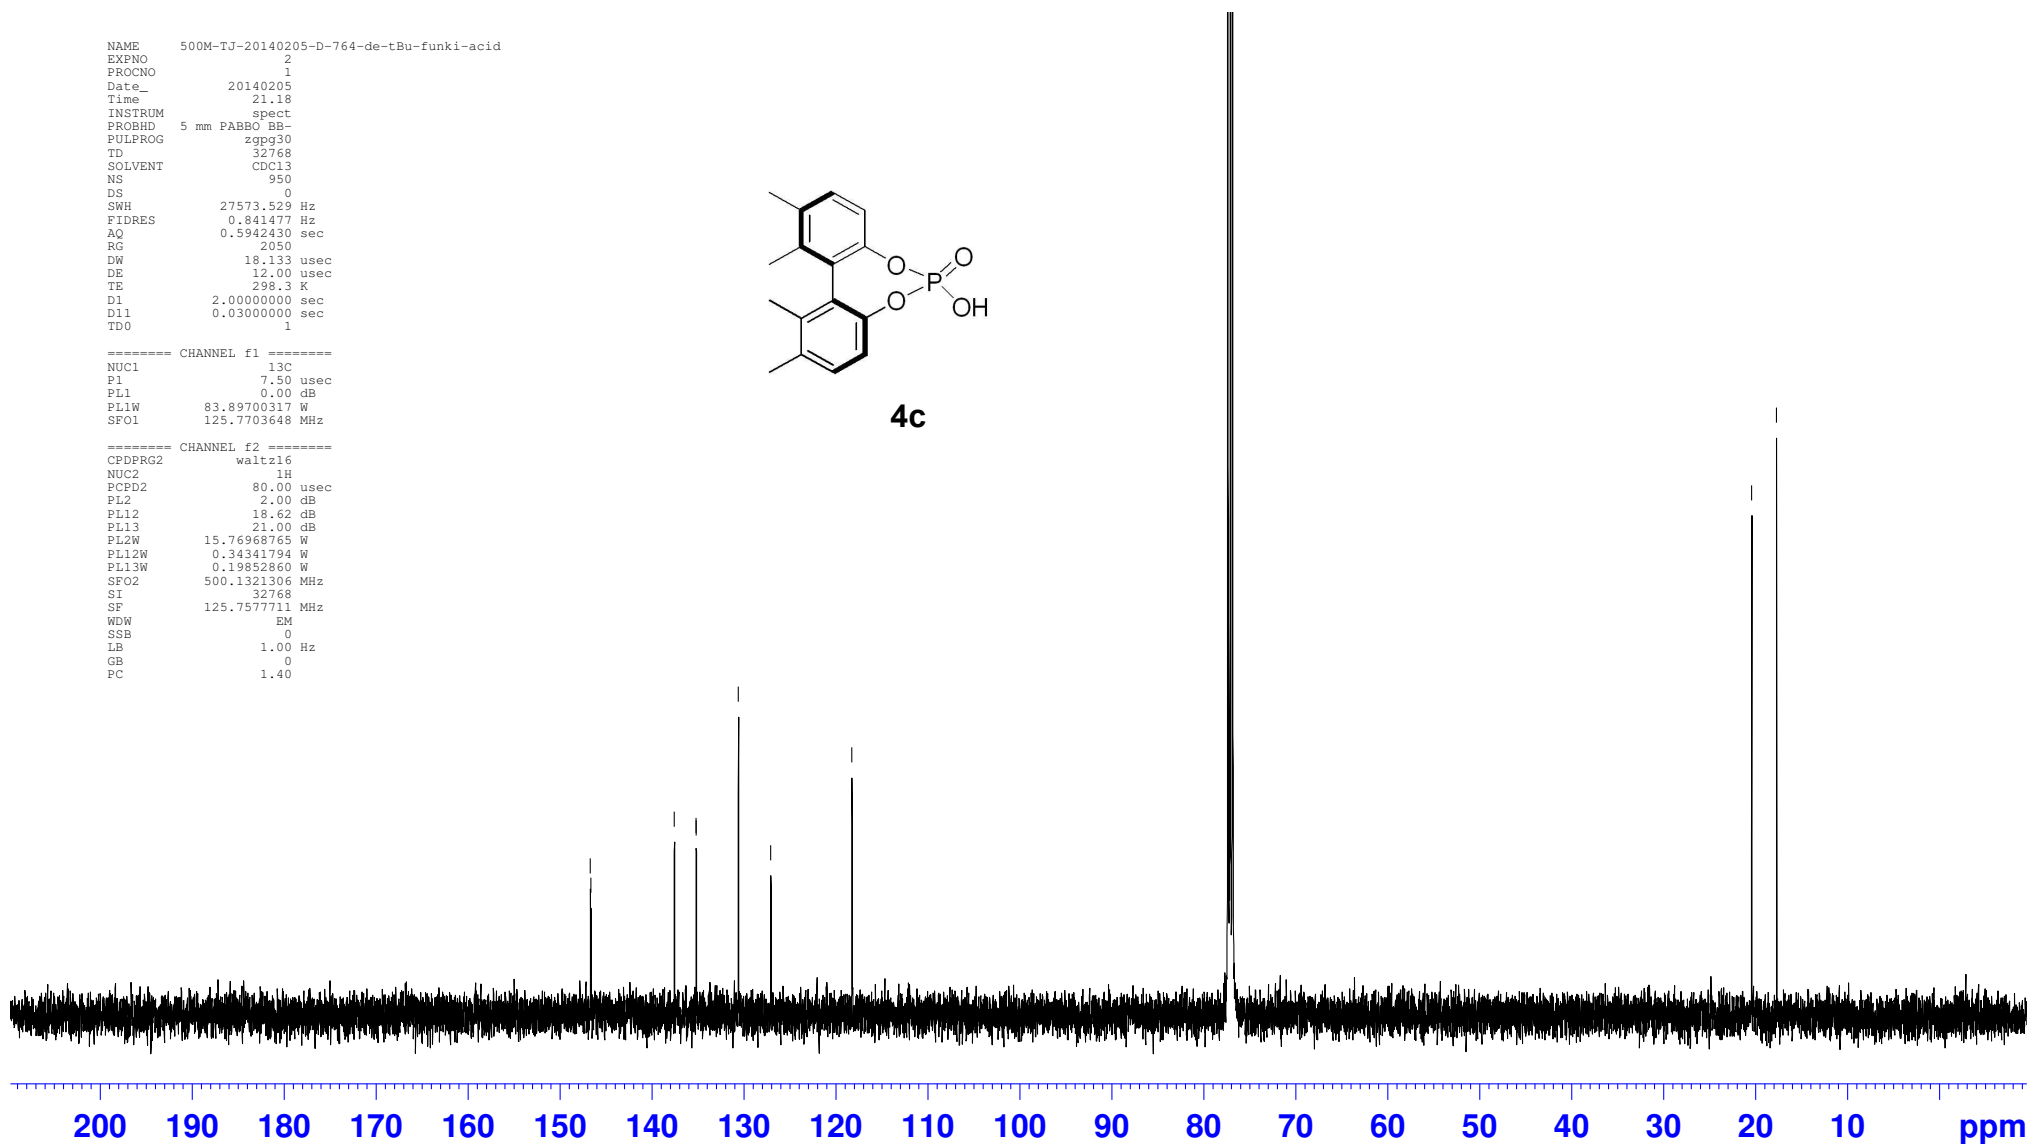

7.353  
7.260

5.125

2.262

1.868

NAME TJ-20140408-D-825-diOH-Br2-frac  
EXPNO 10  
PROCNO 1  
Date\_ 20140408  
Time 13.58  
INSTRUM spect  
PROBHD 5 mm PABBO BB/  
PULPROG zg30  
TD 65536  
SOLVENT CDCl3  
NS 16  
DS 2  
SWH 8012.820 Hz  
FIDRES 0.122266 Hz  
AQ 4.0894966 sec  
RG 54.55  
DW 62.400 usec  
DE 6.50 usec  
TE 298.2 K  
D1 1.00000000 sec  
TD0 1

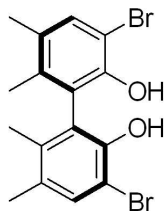

S4

===== CHANNEL f1 =====  
SF01 400.2324716 MHz  
NUC1 1H  
P1 9.40 usec  
SI 65536  
SF 400.2300094 MHz  
WDW EM  
SSB 0  
LB 0.30 Hz  
GB 0  
PC 1.00

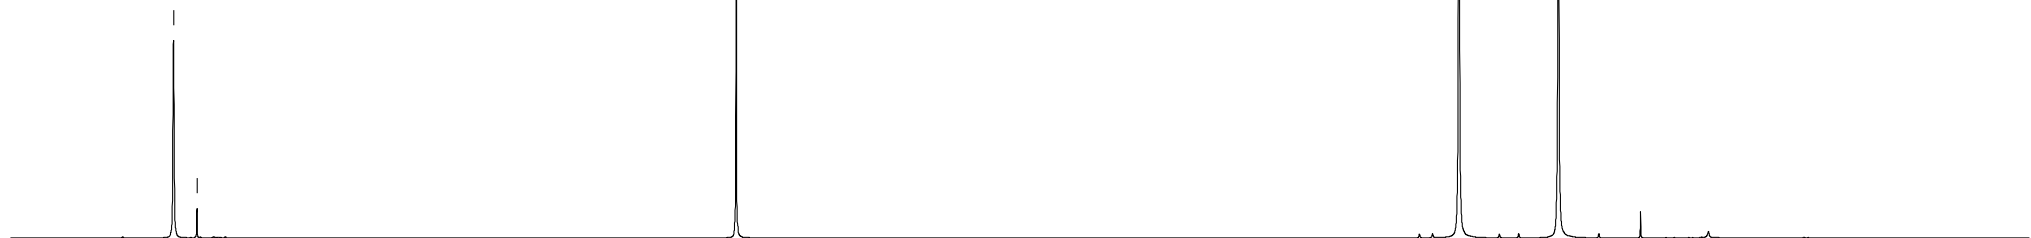

7.5

7.0

6.5

6.0

5.5

5.0

4.5

4.0

3.5

3.0

2.5

2.0

1.5

1.0

0.5

ppm

2.00

1.95

6.28

6.16

NAME TJ-20140408-D-825-diOH-Br2-frac  
 EXPNO 11  
 PROCNO 1  
 Date\_ 20140408  
 Time 14.14  
 INSTRUM spect  
 PROBHD 5 mm PABBO BB/  
 PULPROG zgpg30  
 TD 65536  
 SOLVENT CDCl3  
 NS 128  
 DS 4  
 SWH 24038.461 Hz  
 FIDRES 0.366798 Hz  
 AQ 1.3631988 sec  
 RG 191.9  
 DW 20.800 usec  
 DE 6.50 usec  
 TE 298.2 K  
 D1 2.0000000 sec  
 D11 0.0300000 sec  
 TD0 1

===== CHANNEL f1 =====  
 SFO1 100.6479769 MHz  
 NUC1 13C  
 P1 9.20 usec  
 SI 32768  
 SF 100.6379045 MHz  
 WDW EM  
 SSB 0  
 LB 1.00 Hz  
 GB 0  
 PC 1.40

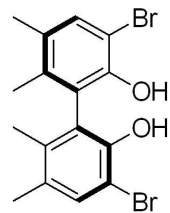

— 147.820  
 — 136.734  
 — 132.878  
 — 130.620  
 — 123.661  
 — 106.786  
 — 77.478  
 — 77.160  
 — 76.843  
 — 19.774  
 — 16.363

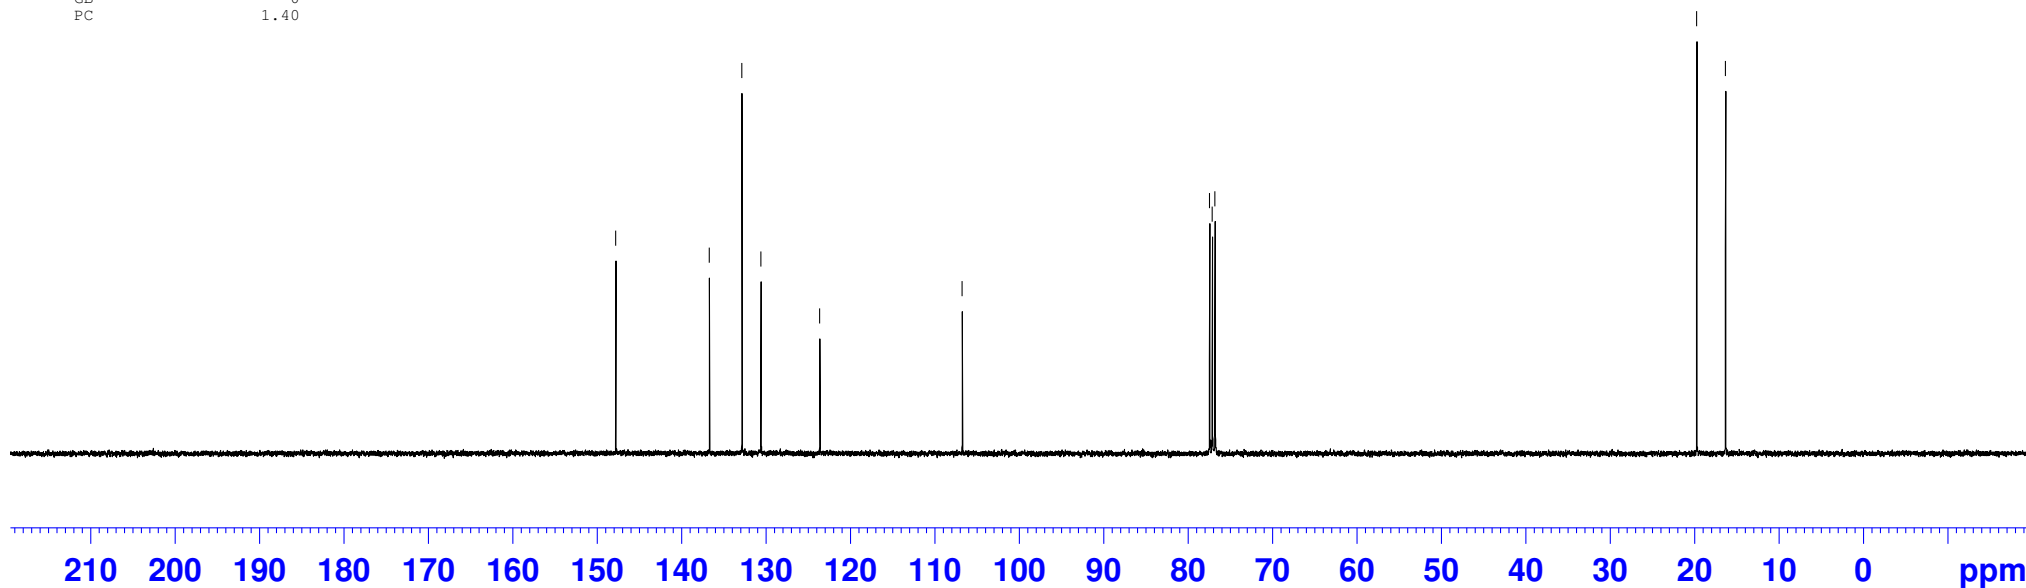

7.391  
7.260

NAME TJ-20140409-E-826-MeI-chiral-crude  
EXPNO 10  
PROCNO 1  
Date\_ 20140409  
Time 13.04  
INSTRUM spect  
PROBHD 5 mm PABBO BB/  
PULPROG zg30  
TD 65536  
SOLVENT CDCl3  
NS 16  
DS 2  
SWH 8012.820 Hz  
FIDRES 0.122266 Hz  
AQ 4.0894966 sec  
RG 171.39  
DW 62.400 usec  
DE 6.50 usec  
TE 298.2 K  
D1 1.00000000 sec  
TDO 1

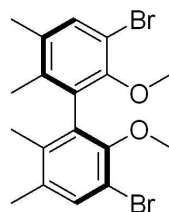

S5

==== CHANNEL f1 =====  
SFO1 400.2324716 MHz  
NUC1 1H  
P1 9.40 usec  
SI 65536  
SF 400.2300093 MHz  
WDW EM  
SSB 0  
LB 0.30 Hz  
GB 0  
PC 1.00

3.502

2.262

1.835

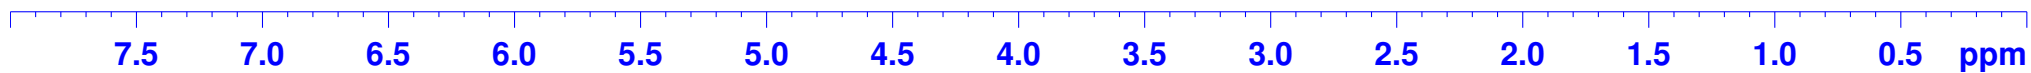

2.00

5.89

6.08

6.11

7.970  
7.964  
7.953  
7.947  
7.932  
7.922  
7.916  
7.912  
7.895  
7.891  
7.559  
7.552  
7.543  
7.534  
7.529  
7.408  
7.260

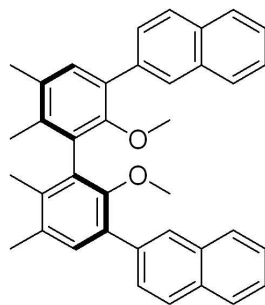

**S6**

— 3.323  
— 2.461  
— 2.134

```

NAME TJ-20140411-E-827-2-naph-cpl-chiral-pr
EXPNO 10
PROCNO 1
Date_ 20140411
Time 10.44
INSTRUM spect
PROBHD 5 mm PABBO BB/
PULPROG zg30
TD 65536
SOLVENT CDCl3
NS 16
DS 2
SWH 8012.820 Hz
FIDRES 0.122266 Hz
AQ 4.0894966 sec
RG 29.53
DW 62.400 usec
DE 6.50 usec
TE 298.2 K
D1 1.00000000 sec
TDO 1

```

```

===== CHANNEL f1 =====
SFO1 400.2324716 MHz
NUC1 1H
P1 9.40 usec
SI 65536
SF 400.2300091 MHz
WDW EM
SSB 0
LB 0.30 Hz
GB 0
PC 1.00

```

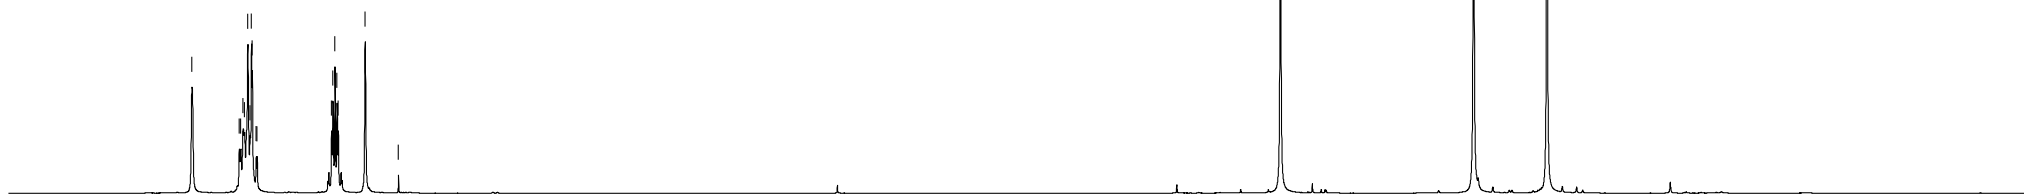

8.5 8.0 7.5 7.0 6.5 6.0 5.5 5.0 4.5 4.0 3.5 3.0 2.5 2.0 1.5 1.0 0.5 ppm

2.00

8.01

3.98

1.94

5.81

5.93

5.79



153.718  
 137.111  
 135.863  
 133.736  
 132.605  
 132.494  
 132.307  
 131.666  
 131.469  
 128.219  
 127.919  
 127.729  
 127.651  
 127.567  
 126.031  
 125.806

77.478  
 77.161  
 76.843

60.404

20.325  
 17.039

NAME TJ-20140411-E-827-2-naph-cpl-chiral-prod  
 EXPNO 11  
 PROCNO 1  
 Date\_ 20140411  
 Time 11.09  
 INSTRUM spect  
 PROBHD 5 mm PABBO BB/  
 PULPROG zgpg30  
 TD 65536  
 SOLVENT CDC13  
 NS 256  
 DS 4  
 SWH 24038.461 Hz  
 FIDRES 0.366798 Hz  
 AQ 1.3631988 sec  
 RG 191.9  
 DW 20.800 usec  
 DE 6.50 usec  
 TE 298.2 K  
 D1 2.0000000 sec  
 D11 0.0300000 sec  
 TDO 1

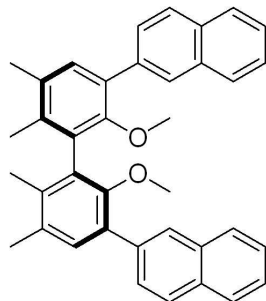

**S6**

----- CHANNEL f1 -----  
 SF01 100.6479769 MHz  
 NUC1 13C  
 P1 9.20 usec  
 SI 32768  
 SF 100.6379112 MHz  
 WDW EM  
 SSB 0  
 LB 1.00 Hz  
 GB 0  
 PC 1.40

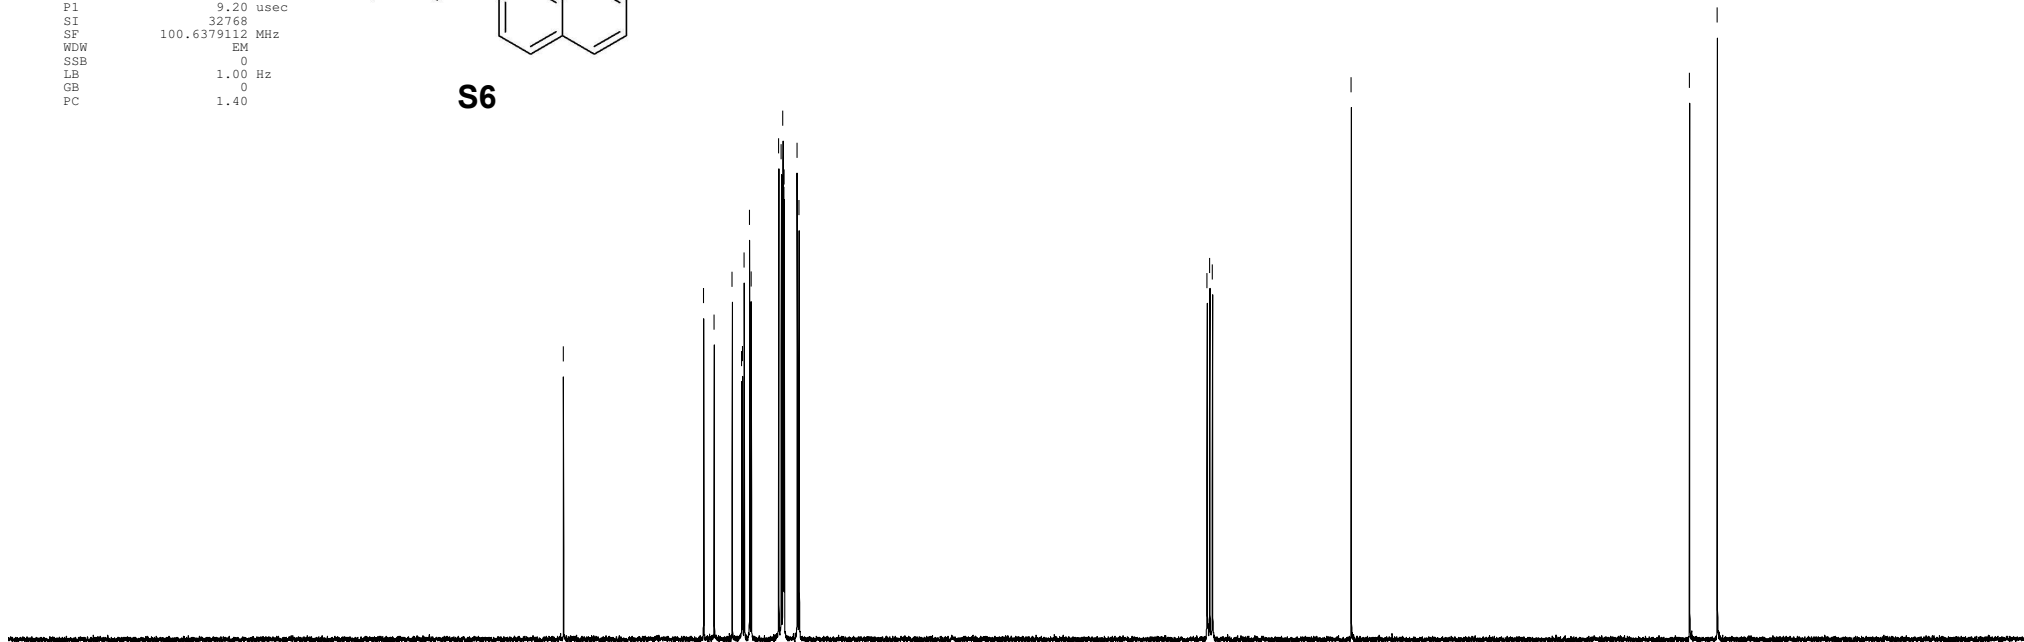

210 200 190 180 170 160 150 140 130 120 110 100 90 80 70 60 50 40 30 20 10 0 ppm

7.887  
7.877  
7.872  
7.867  
7.863  
7.854  
7.777  
7.772  
7.755  
7.751  
7.502  
7.499  
7.497  
7.489  
7.481  
7.478  
7.476  
7.357  
7.260

— 5.006

— 2.369

— 2.054

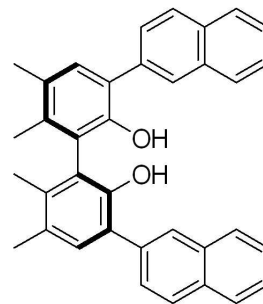

**S7**

```

NAME      TJ-20140414-E-829-2-naph-BBr3-chiral-1
EXPNO     10
PROCNO    1
Date_     20140414
Time      10.22
INSTRUM   spect
PROBHD    5 mm PABBO BB/
PULPROG   zg30
TD         65536
SOLVENT   CDCl3
NS         16
DS         2
SWH        8012.820 Hz
FIDRES     0.122266 Hz
AQ         4.0894966 sec
RG         139.19
DW         62.400 usec
DE         6.50 usec
TE         298.2 K
D1         1.00000000 sec
TDO        1
  
```

```

===== CHANNEL f1 =====
SF01      400.2324716 MHz
NUC1       1H
P1         9.40 usec
SI         65536
SF         400.2300095 MHz
WDW        EM
SSB        0
LB         0.30 Hz
GB         0
PC         1.00
  
```

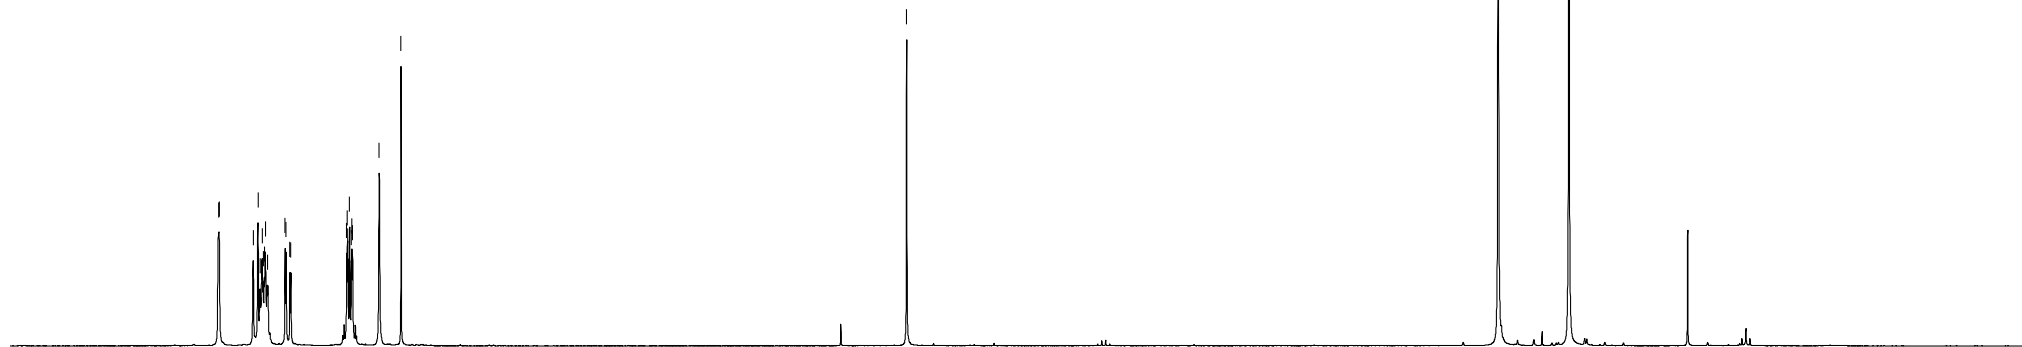

8.5 8.0 7.5 7.0 6.5 6.0 5.5 5.0 4.5 4.0 3.5 3.0 2.5 2.0 1.5 1.0 0.5 ppm

2.00  
2.01  
4.05  
2.02  
4.05  
1.96

1.91

5.95

5.93

```

NAME TJ-20140414-E-829-2-naph-BBr3-chiral-prod
EXPNO 11
PROCNO 1
Date_ 20140414
Time 10.55
INSTRUM spect
PROBHD 5 mm PABBO BB/
PULPROG zgpg30
TD 65536
SOLVENT CDCl3
NS 256
DS 4
SWH 24038.461 Hz
FIDRES 0.366798 Hz
AQ 1.3631988 sec
RG 191.9
DW 20.800 usec
DE 6.50 usec
TE 298.2 K
D1 2.0000000 sec
D11 0.0300000 sec
TD0 1
===== CHANNEL f1 =====
SF01 100.6479769 MHz
NUC1 13C
P1 9.20 usec
SI 32768
SF 100.6378998 MHz
WDW EM
SSB 0
LB 1.00 Hz
GB 0
PC 1.40

```

148.814  
136.697  
135.609  
133.696  
132.626  
132.486  
129.602  
128.234  
128.028  
127.993  
127.772  
126.240  
126.033  
125.735  
121.838

77.478  
77.160  
76.843

20.038  
16.671

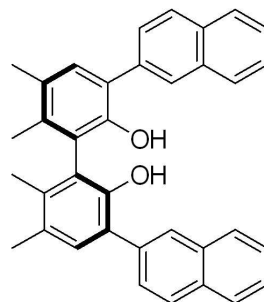

S7

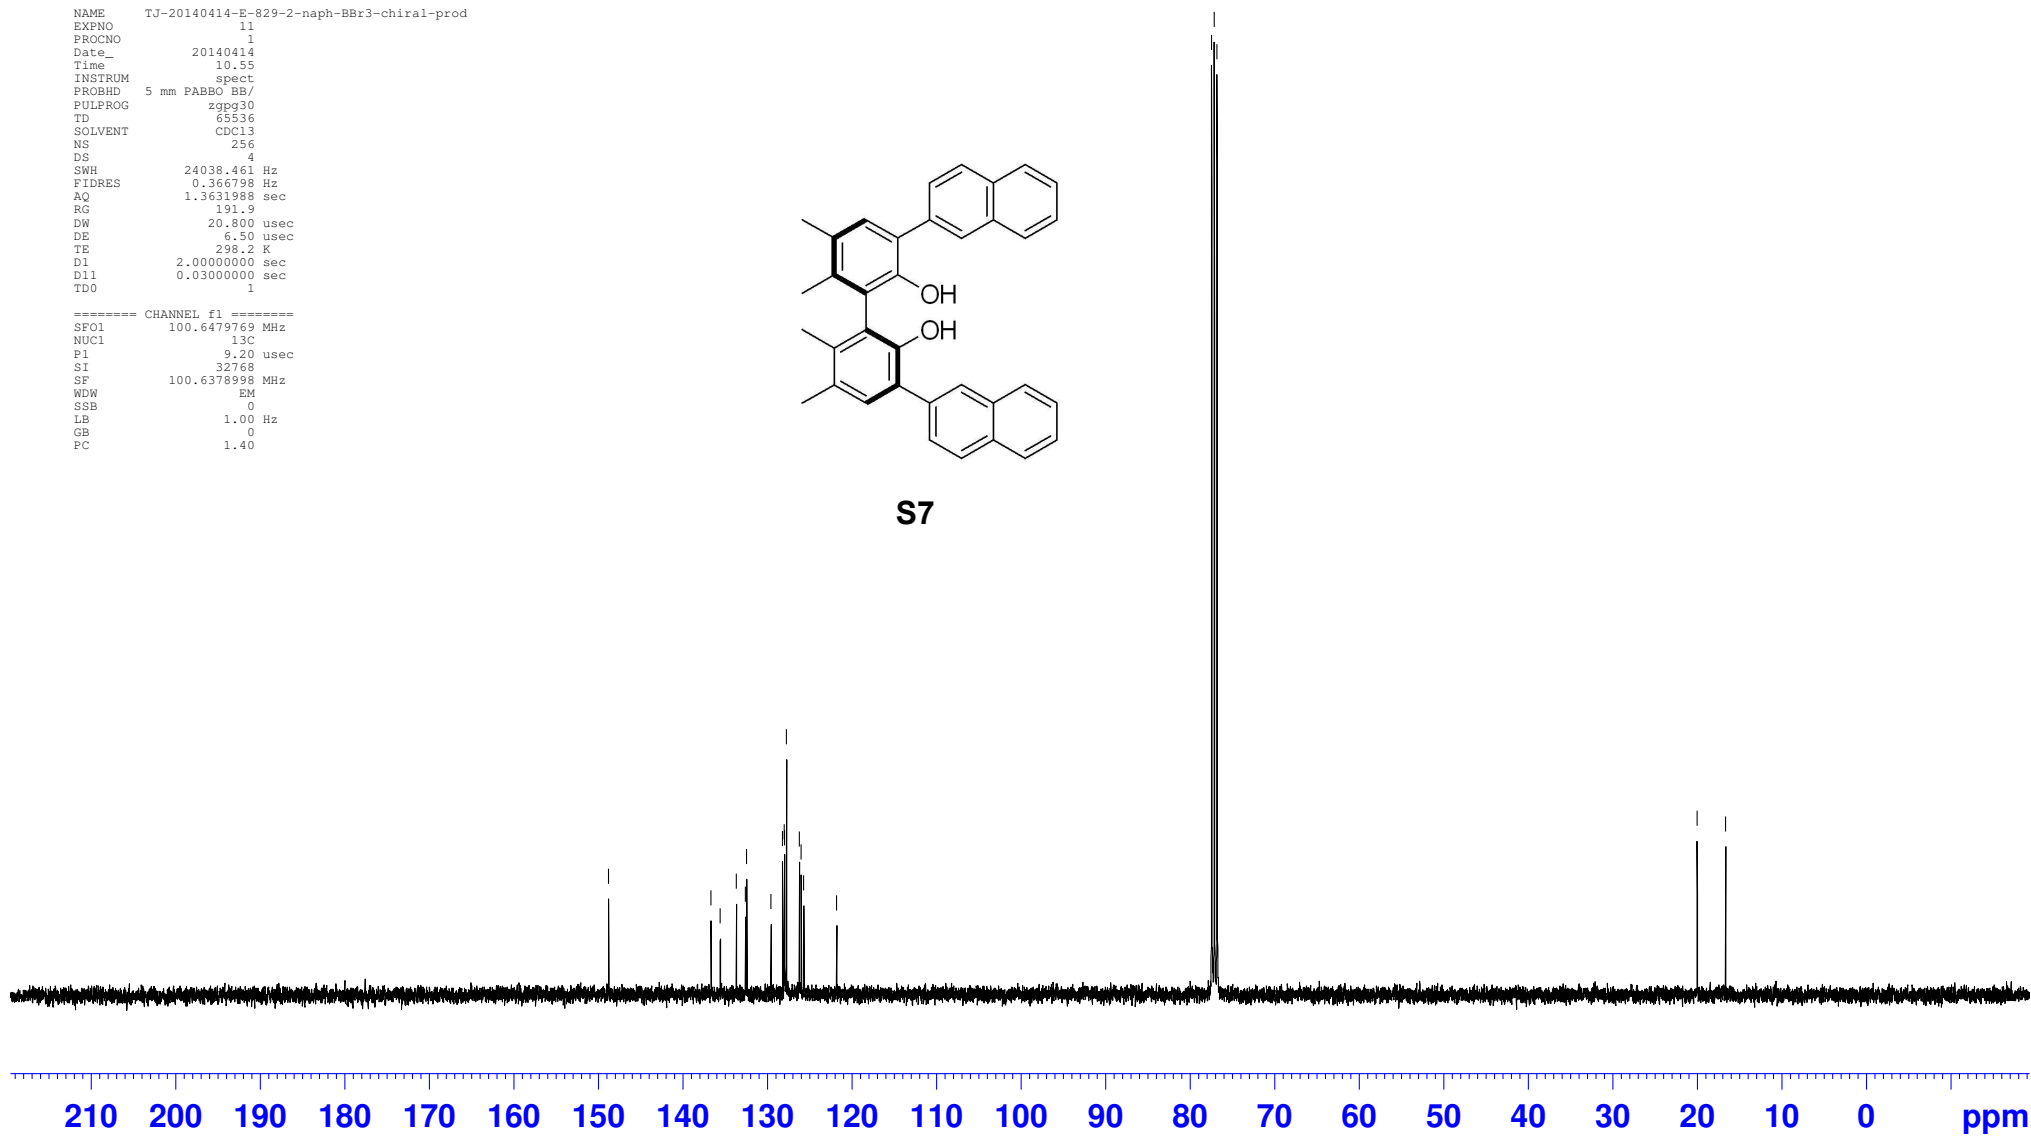

7.862  
7.695  
7.688  
7.680  
7.671  
7.567  
7.559  
7.544  
7.527  
7.505  
7.489  
7.485  
7.468  
7.464  
7.312  
7.263  
7.260  
7.249  
7.240

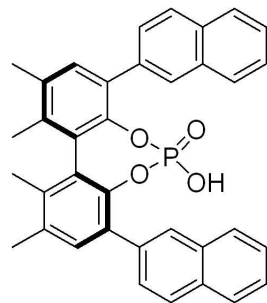

4d

— 2.404  
— 2.143

```

NAME      TJ-20140420-E-832-2-naph-funki-Pacid
EXPNO     1
PROCNO    1
Date_     20140420
Time      23.07
INSTRUM   spect
PROBHD    5 mm PABBO BB/
PULPROG   zg30
TD        65536
SOLVENT   CDCl3
NS        16
DS        2
SWH       8012.820 Hz
FIDRES    0.122266 Hz
AQ        4.0894966 sec
RG        139.19
DW        62.400 usec
DE        6.50 usec
TE        298.2 K
D1        1.00000000 sec
TD0       1
  
```

```

===== CHANNEL f1 =====
SFO1    400.2324716 MHz
NUC1     1H
P1       9.40 usec
SI       65536
SF       400.2300094 MHz
WDW      EM
SSB      0
LB       0.30 Hz
GB       0
PC       1.00
  
```

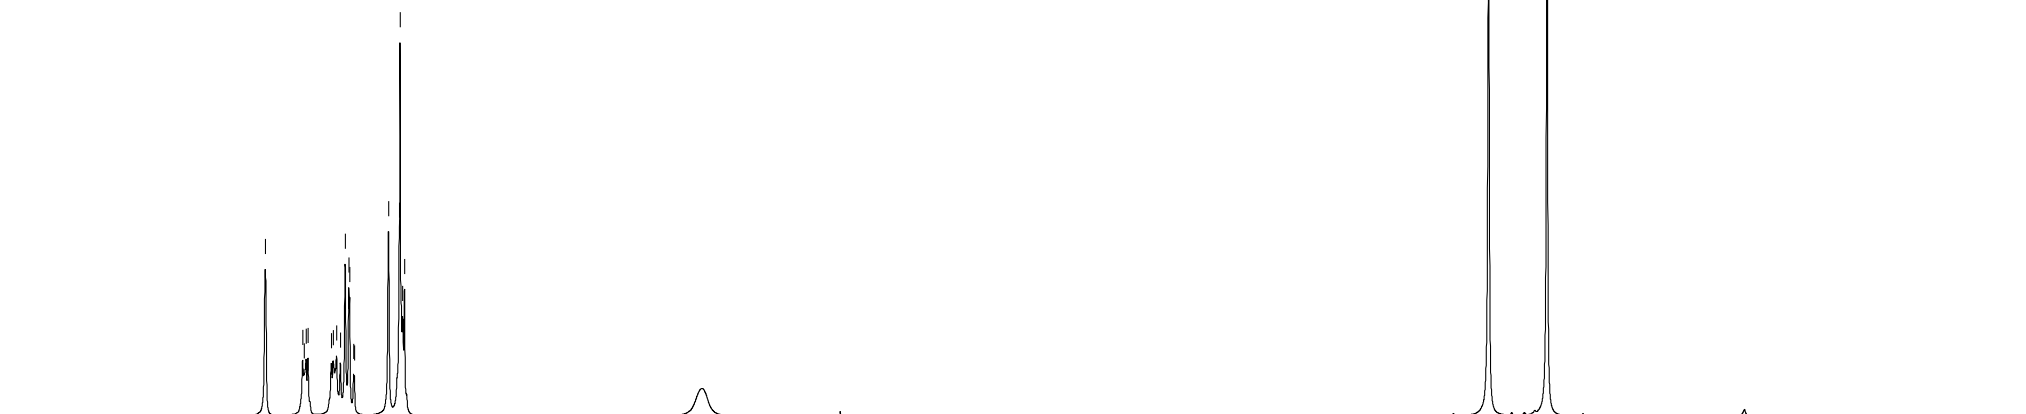

8.5 8.0 7.5 7.0 6.5 6.0 5.5 5.0 4.5 4.0 3.5 3.0 2.5 2.0 1.5 1.0 0.5 ppm

2.00  
2.08  
2.09  
2.10  
2.03  
2.07  
5.22

6.27  
6.06

NAME TJ-20140420-E-832-2-naph-funki-Pacid  
 EXPNO 12  
 PROCNO 1  
 Date\_ 20140421  
 Time 2.04  
 INSTRUM spect  
 PROBHD 5 mm PABBO BB/  
 PULPROG zgpg30  
 TD 65536  
 SOLVENT CDCl3  
 NS 3064  
 DS 4  
 SWH 24038.461 Hz  
 FIDRES 0.366798 Hz  
 AQ 1.3631988 sec  
 RG 191.9  
 DW 20.800 usec  
 DE 6.50 usec  
 TE 298.2 K  
 D1 2.0000000 sec  
 D11 0.0300000 sec  
 TDO 1

===== CHANNEL f1 =====  
 SFO1 100.6479769 MHz  
 NUC1 13C  
 P1 9.20 usec  
 SI 32768  
 SF 100.6378995 MHz  
 WDW EM  
 SSB 0  
 LB 1.00 Hz  
 GB 0  
 PC 1.40

143.544  
 143.453  
 136.854  
 134.711  
 134.477  
 133.313  
 132.562  
 132.160  
 131.614  
 131.577  
 128.418  
 128.355  
 128.098  
 127.615  
 127.453  
 125.716  
 125.654

77.477  
 77.160  
 76.842

20.466  
 17.679

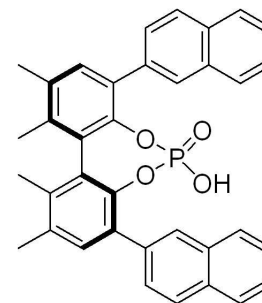

4d

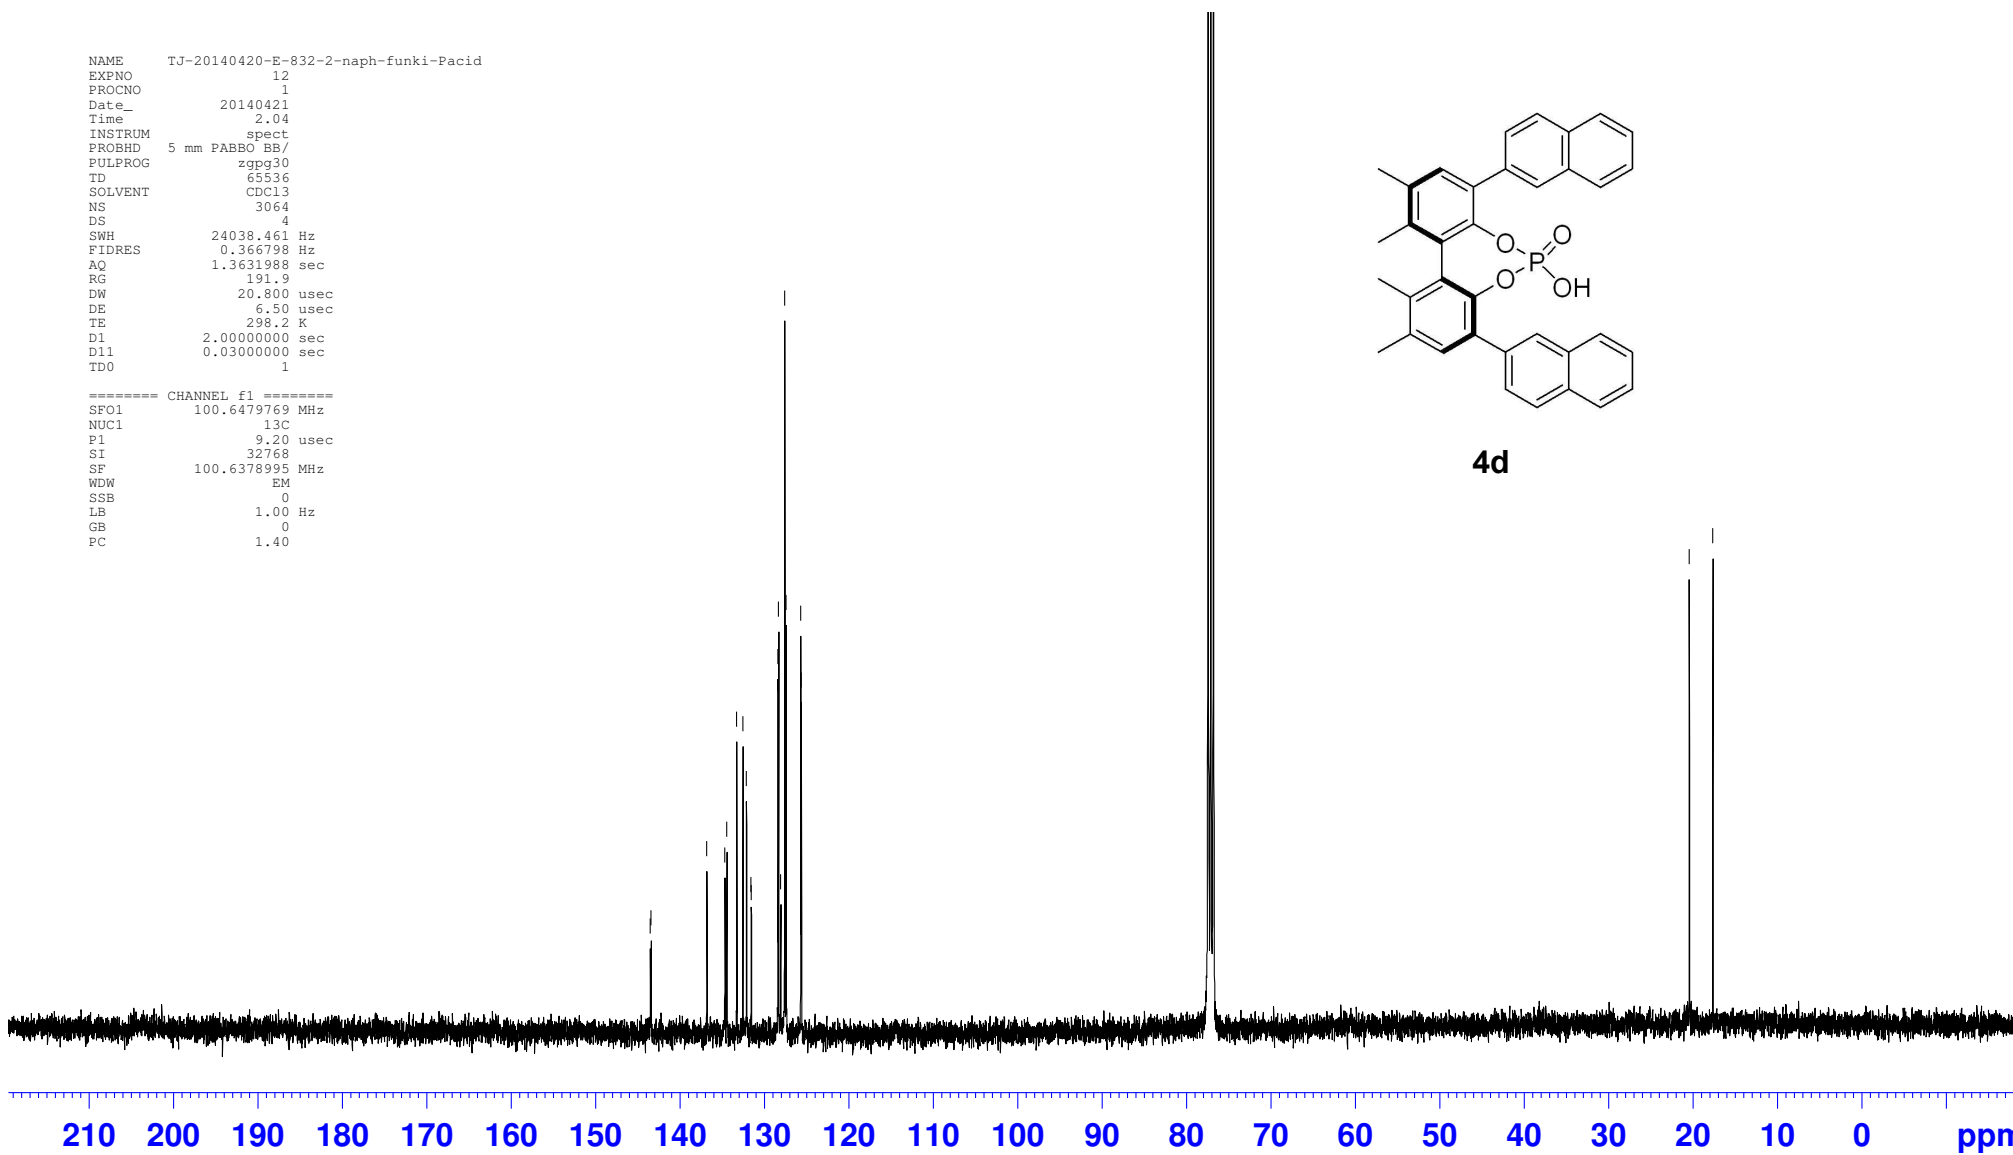

7.260  
7.228  
7.218

2.264  
1.844  
1.788  
1.470  
1.438

NAME TJ-20140825-E-850-funki-PNHTf-prod  
EXPNO 10  
PROCNO 1  
Date\_ 20140825  
Time 19.50  
INSTRUM spect  
PROBHD 5 mm PABBO BB/  
PULPROG zg30  
TD 65536  
SOLVENT CDCl3  
NS 16  
DS 2  
SWH 8012.820 Hz  
FIDRES 0.122266 Hz  
AQ 4.0894966 sec  
RG 69.35  
DW 62.400 usec  
DE 6.50 usec  
TE 299.8 K  
D1 1.00000000 sec  
TD0 1

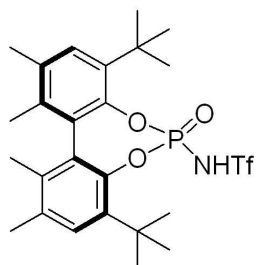

4e

==== CHANNEL f1 =====  
SFO1 400.2424716 MHz  
NUC1 1H  
P1 9.40 usec  
SI 65536  
SF 400.2400095 MHz  
WDW EM  
SSB 0  
LB 0.30 Hz  
GB 0  
PC 1.00

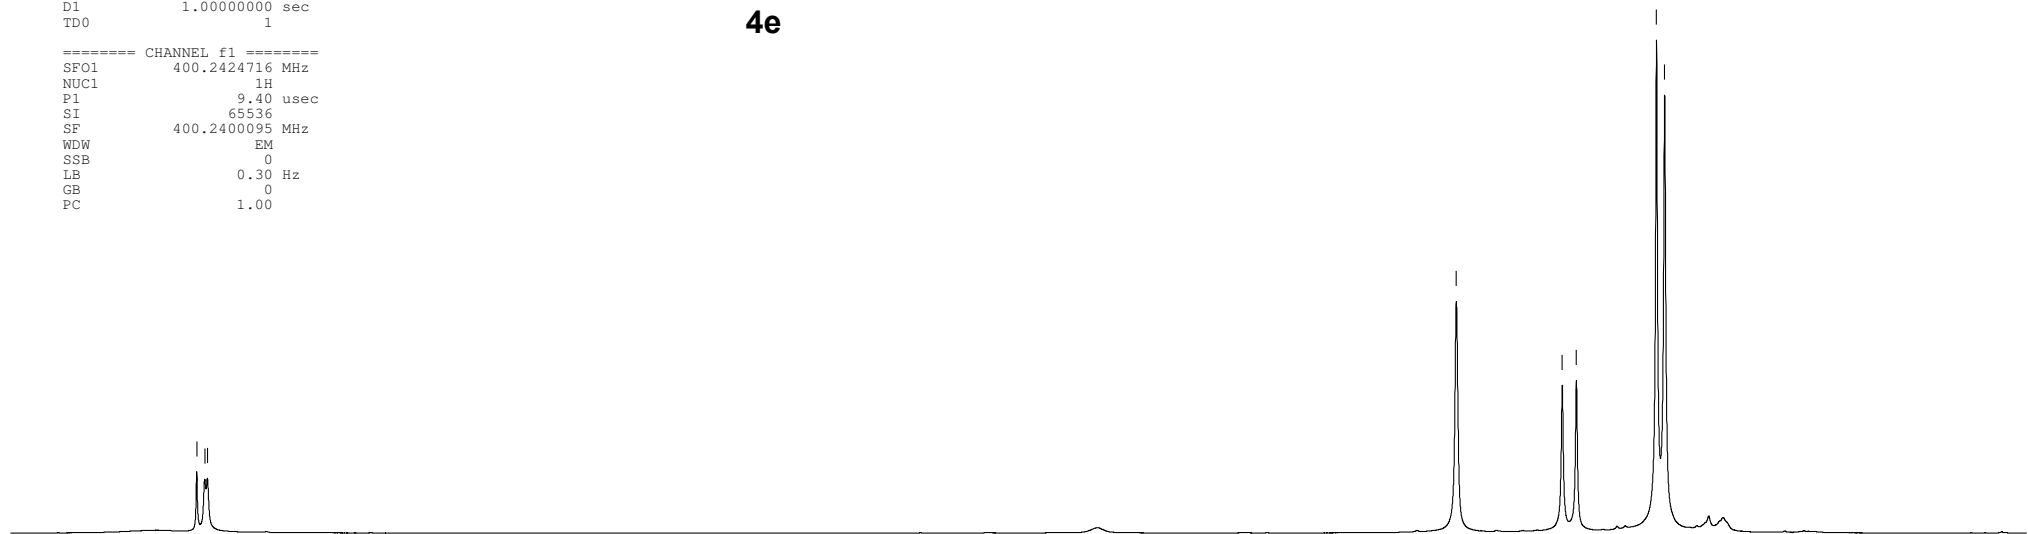

7.5 7.0 6.5 6.0 5.5 5.0 4.5 4.0 3.5 3.0 2.5 2.0 1.5 1.0 0.5 ppm

1.04  
1.01

6.01  
3.07  
2.97  
9.03  
9.16

NAME TJ-20140825-E-850-funki-PNHTf-prod  
 EXPNO 18  
 PROCNO 1  
 Date\_ 20140827  
 Time 1.56  
 INSTRUM spect  
 PROBHD 5 mm PABBO BB-  
 PULPROG zgpg30  
 TD 65536  
 SOLVENT CDC13  
 NS 6144  
 DS 4  
 SWH 24038.461 Hz  
 FIDRES 0.366798 Hz  
 AQ 1.3631988 sec  
 RG 2050  
 DW 20.800 usec  
 DE 51.93 usec  
 TE 298.2 K  
 D1 2.00000000 sec  
 D11 0.03000000 sec  
 TD0 1

===== CHANNEL f1 =====  
 NUC1 13C  
 P1 6.43 usec  
 PL1 -3.00 dB  
 PL1W 69.66502380 W  
 SFO1 100.6228298 MHz

===== CHANNEL f2 =====  
 CPDPRG2 waltz16  
 NUC2 1H  
 PCPD2 80.00 usec  
 PL2 16.00 dB  
 PL12 15.00 dB  
 PL13 15.00 dB  
 PL2W 0.24733528 W  
 PL12W 0.31137666 W  
 PL13W 0.31137666 W  
 SFO2 400.1316005 MHz  
 SI 32768  
 SF 100.6127548 MHz  
 WDW EM  
 SSB 0  
 LB 1.00 Hz  
 GB 0  
 PC 1.40

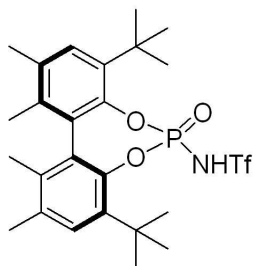

4e

144.030  
 143.924  
 143.634  
 143.543  
 138.292  
 138.251  
 137.290  
 137.242  
 135.783  
 135.735  
 134.619  
 134.360  
 134.345  
 129.340  
 128.494  
 128.239  
 124.043  
 120.851  
 117.656  
 114.463

77.478  
 77.160  
 76.843

35.094  
 34.826  
 31.758  
 31.260  
 20.603  
 20.512  
 16.820  
 16.685

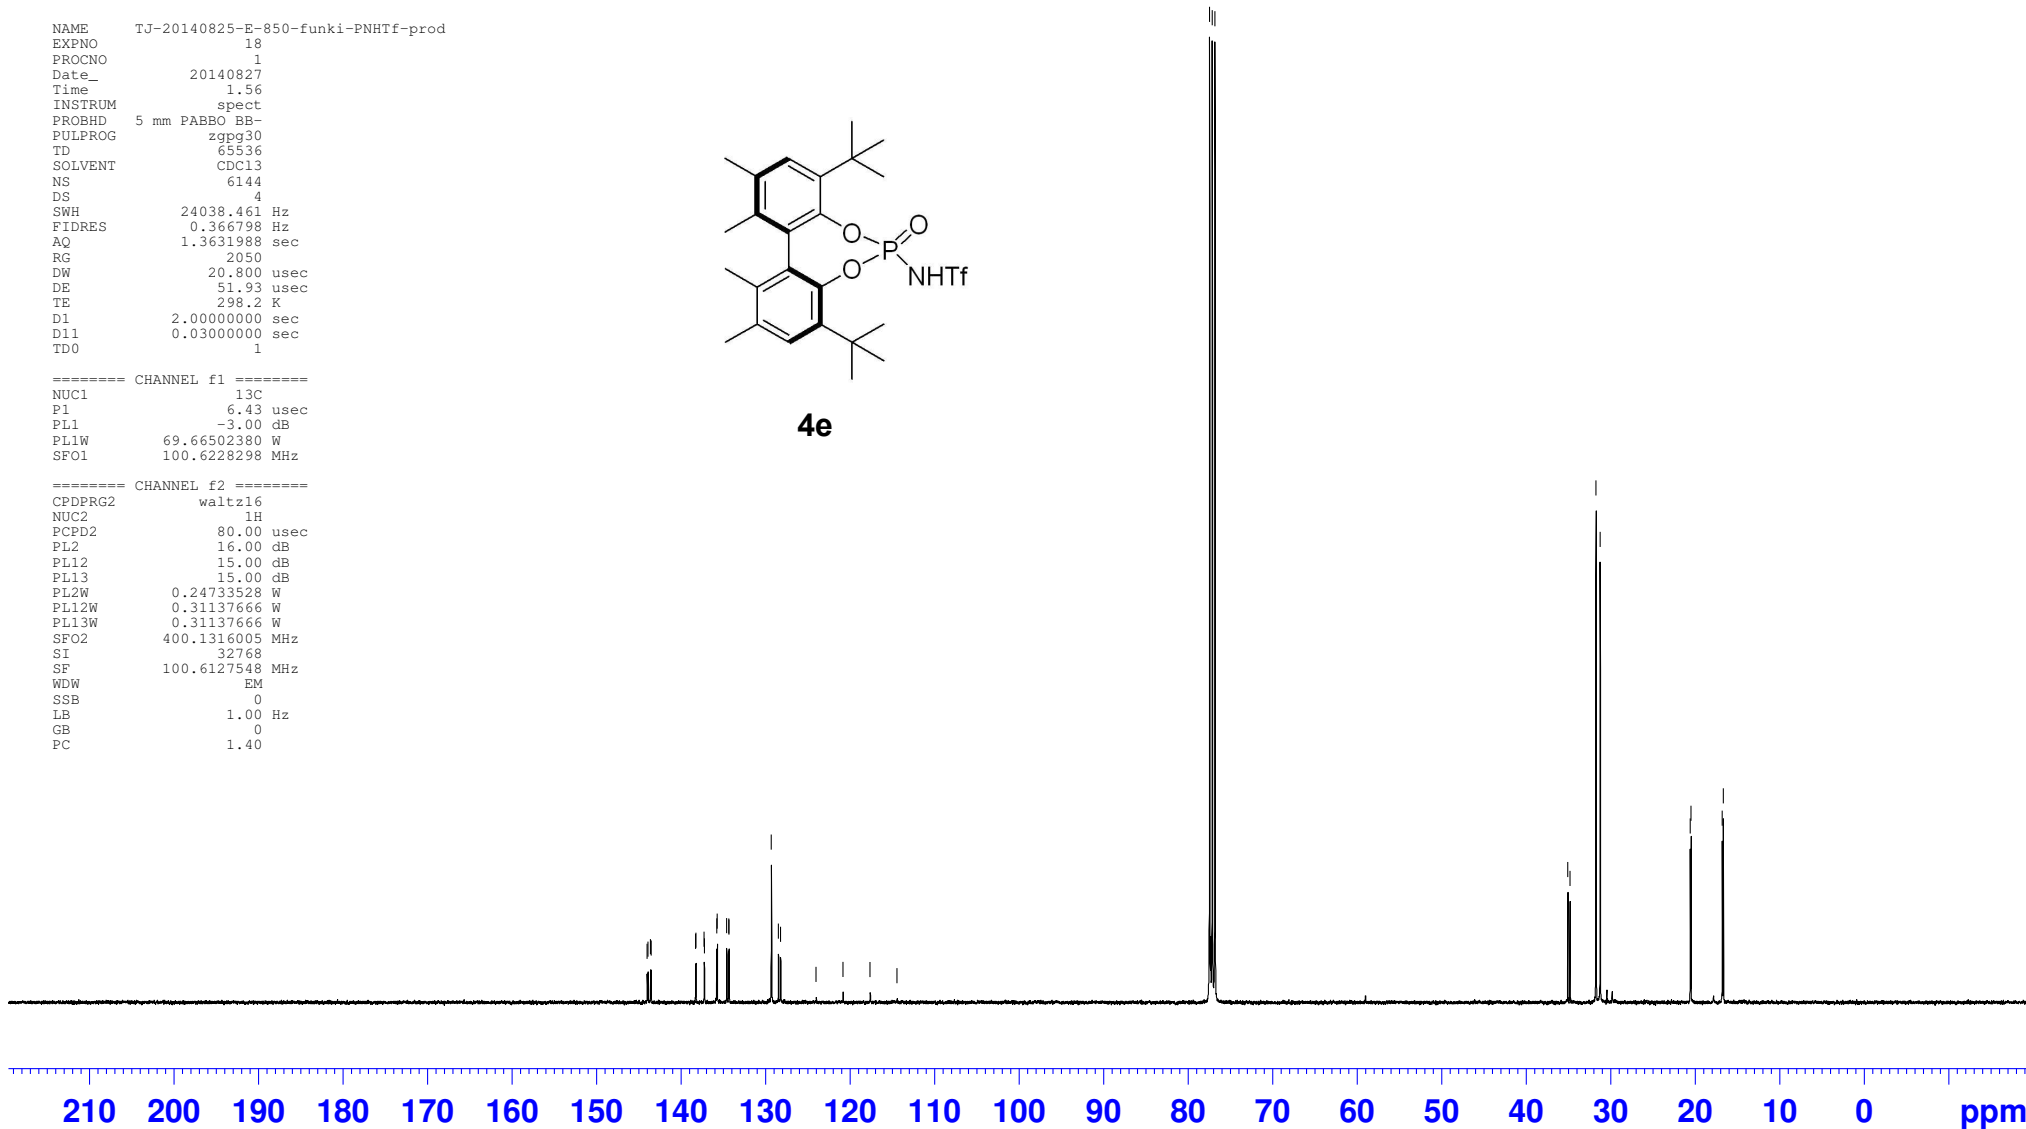

NAME TJ-20130927-D-687-B-diEt-prod  
 EXPNO 10  
 PROCNO 1  
 Date\_ 20130927  
 Time 14.50  
 INSTRUM spect  
 PROBHD 5 mm PABBO BB-  
 PULPROG zg30  
 TD 65536  
 SOLVENT CDCl3  
 NS 16  
 DS 2  
 SWH 8223.685 Hz  
 FIDRES 0.125483 Hz  
 AQ 3.9846387 sec  
 RG 80.6  
 DW 60.800 usec  
 DE 6.50 usec  
 TE 300.2 K  
 D1 1.00000000 sec  
 TD0 1

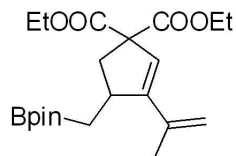

===== CHANNEL f1 =====  
 NUC1 1H  
 P1 8.90 usec  
 PL1 -4.00 dB  
 PL1W 24.73352814 W  
 SFO1 400.1324710 MHz  
 SI 32768  
 SF 400.1300092 MHz  
 WDW EM  
 SSB 0  
 LB 0.30 Hz  
 GB 0  
 PC 1.00

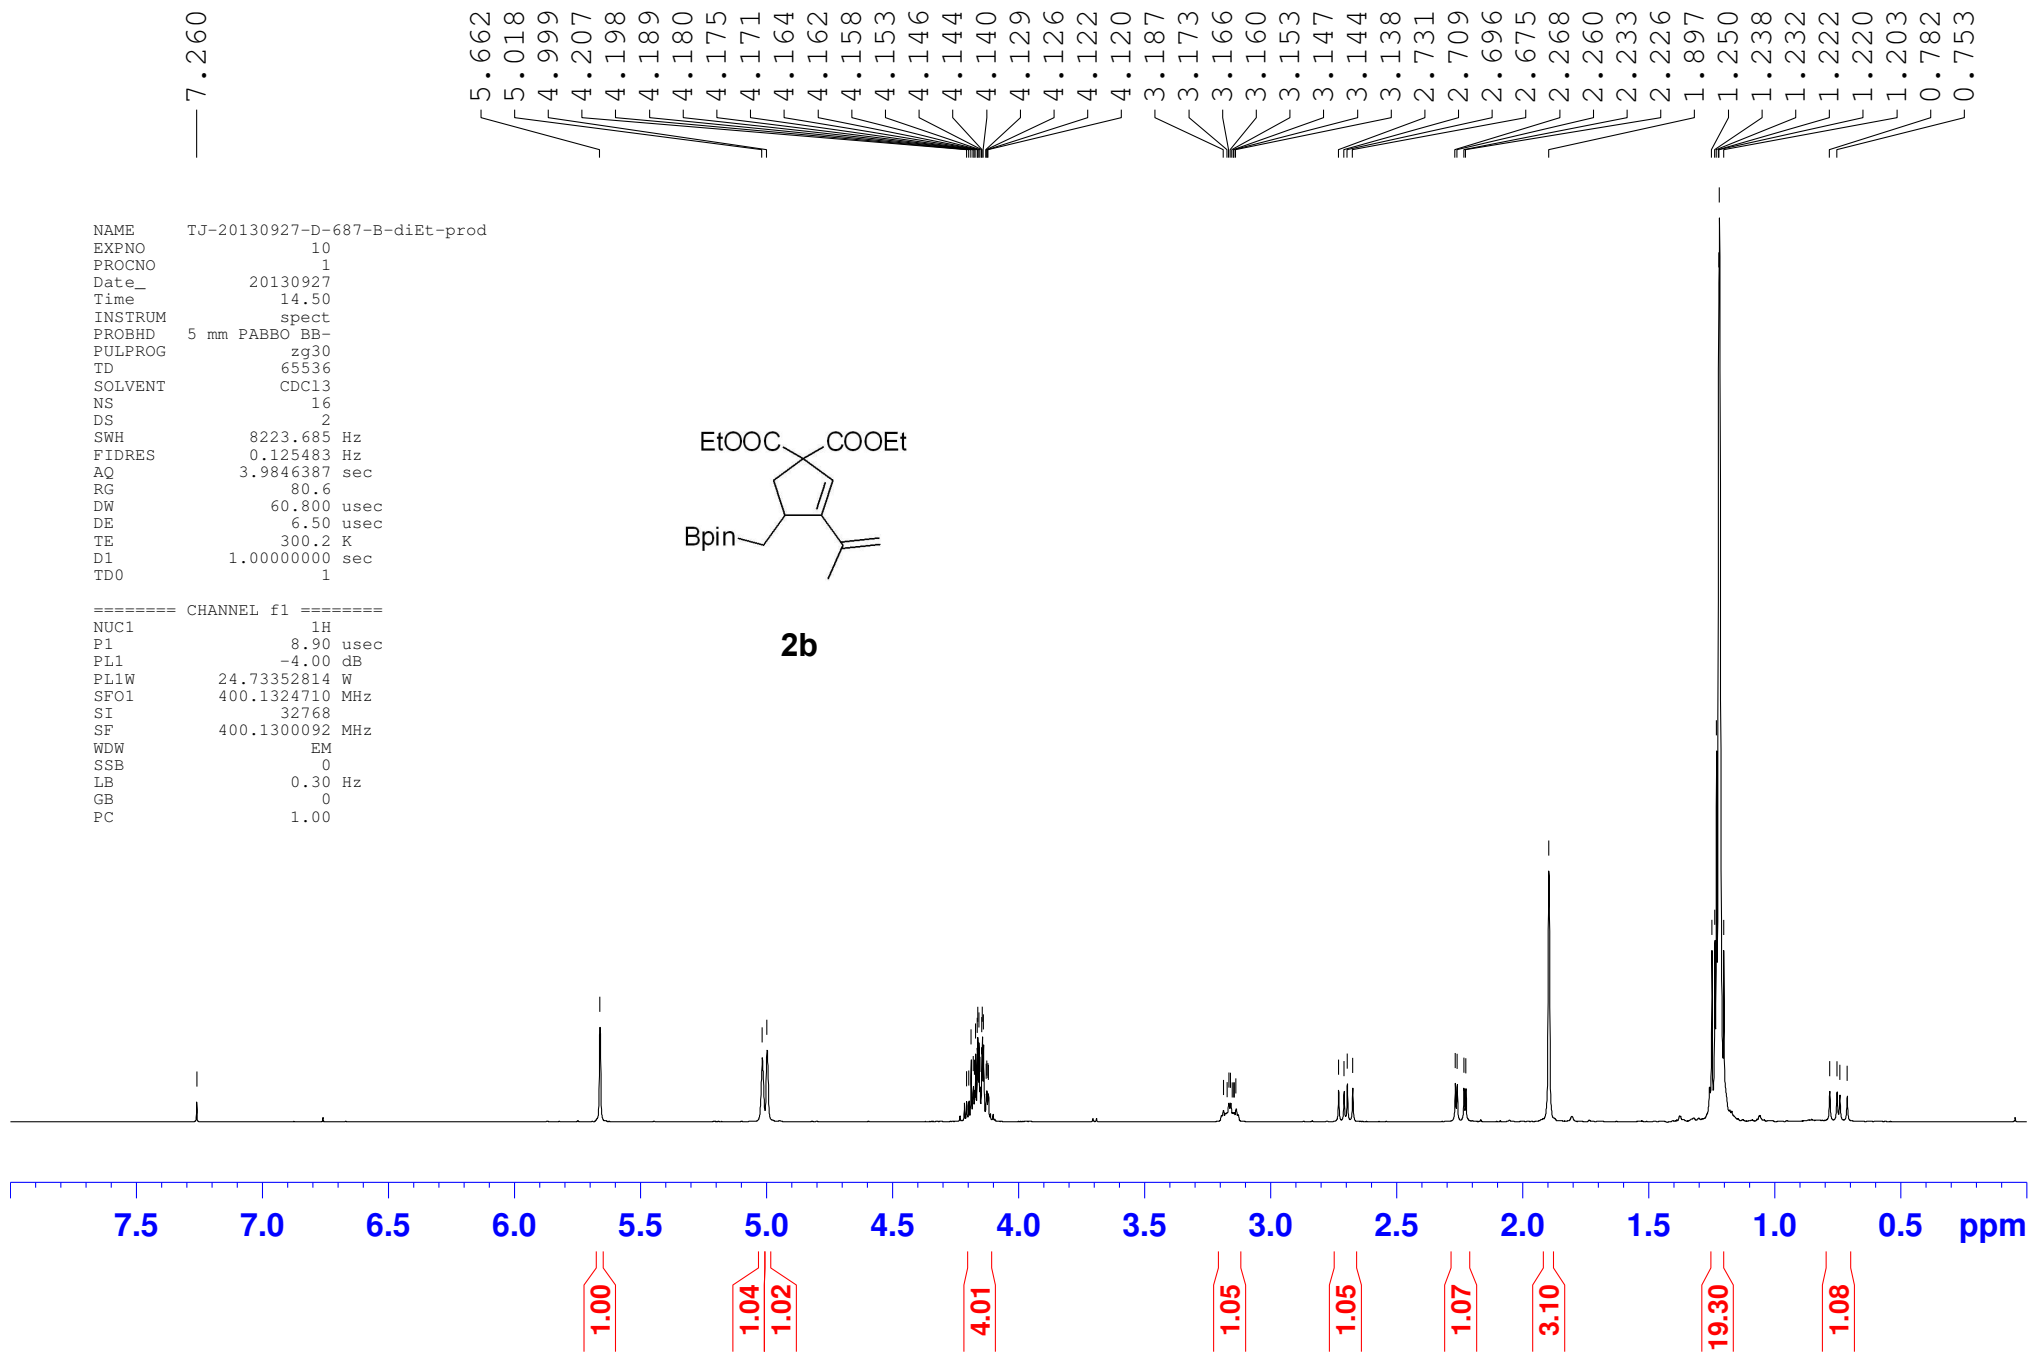



```

NAME      TJ-20130927-D-687-B-diEt-prod
EXPNO     11
PROCNO    1
Date_     20130927
Time      15.03
INSTRUM   spect
PROBHD    5 mm PABBO BB-
PULPROG   zgpg30
TD        65536
SOLVENT   CDC13
NS        172
DS        4
SWH       24038.461 Hz
FIDRES    0.366798 Hz
AQ        1.3631988 sec
RG        2050
DW        20.800 usec
DE        51.93 usec
TE        300.3 K
D1        2.00000000 sec
D11       0.03000000 sec
TD0       1

```

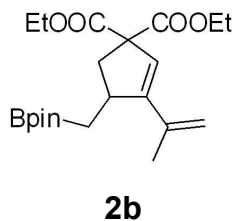

```

===== CHANNEL f1 =====
NUC1      13C
P1        6.43 usec
PL1       -3.00 dB
PL1W      69.66502380 W
SFO1      100.6228298 MHz

===== CHANNEL f2 =====
CPDPRG2   waltz16
NUC2      1H
PCPD2     80.00 usec
PL2       16.00 dB
PL12      15.00 dB
PL13      15.00 dB
PL2W      0.24733528 W
PL12W     0.31137666 W
PL13W     0.31137666 W
SFO2      400.1316005 MHz
SI        32768
SF        100.6127571 MHz
WDW       EM
SSB       0
LB        1.00 Hz
GB        0
PC        1.40

```

171.662  
171.563

— 153.692

— 138.010

— 123.169

— 115.254

83.133  
77.478  
77.161  
76.843

65.716  
61.534  
61.458

40.020  
39.562

25.024  
24.790  
21.364  
17.945  
14.134

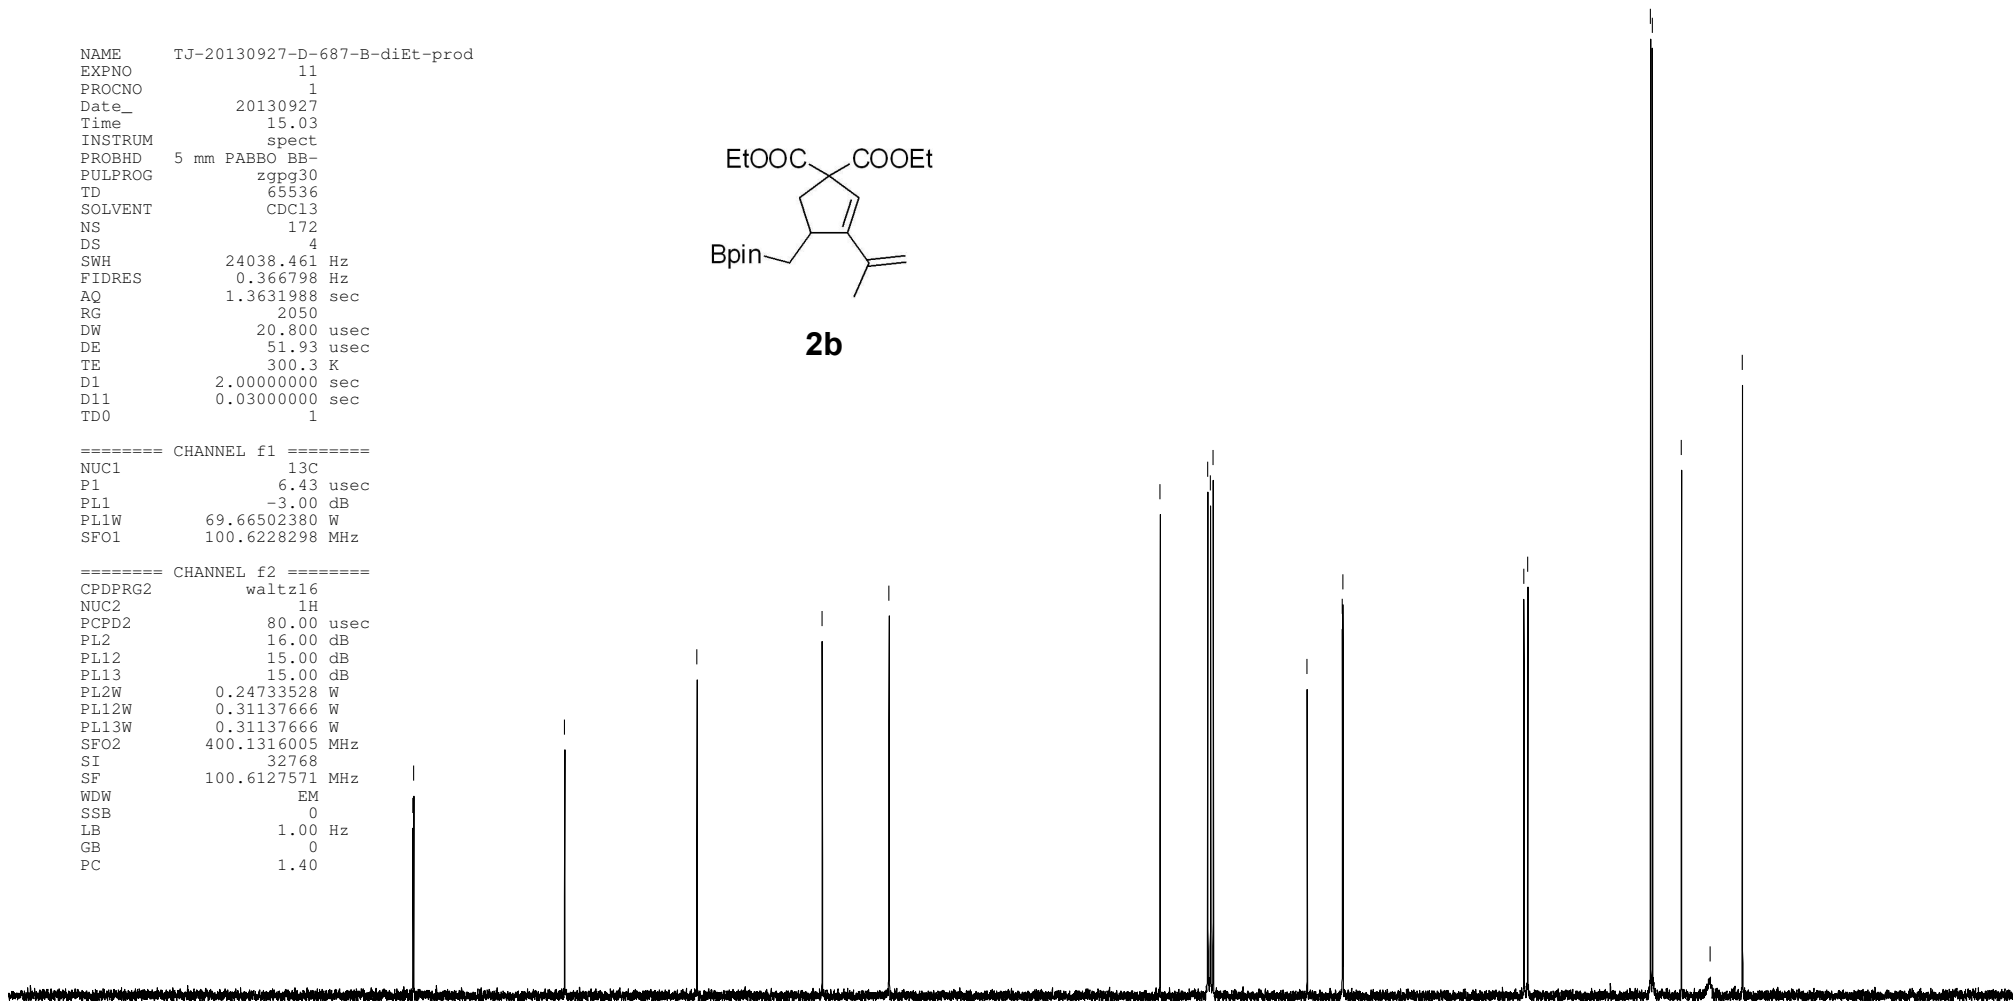

210 200 190 180 170 160 150 140 130 120 110 100 90 80 70 60 50 40 30 20 10 0 ppm

NAME TJ-20140803-E-981-cy-enallene-B-prod  
 EXPNO 10  
 PROCNO 1  
 Date\_ 20140803  
 Time 16.26  
 INSTRUM spect  
 PROBHD 5 mm PABBO BB-  
 PULPROG zg30  
 TD 65536  
 SOLVENT CDCl3  
 NS 16  
 DS 2  
 SNH 8223.685 Hz  
 FIDRES 0.125483 Hz  
 AQ 3.9846387 sec  
 RG 144  
 DW 60.800 usec  
 DE 6.50 usec  
 TE 301.0 K  
 D1 1.00000000 sec  
 TDO 1

===== CHANNEL f1 =====  
 NUC1 1H  
 P1 8.90 usec  
 PL1 -4.00 dB  
 PL1W 24.73352814 W  
 SFO1 400.1324710 MHz  
 SI 32768  
 SF 400.1300093 MHz  
 WDW EM  
 SSB 0  
 LB 0.30 Hz  
 GB 0  
 PC 1.00

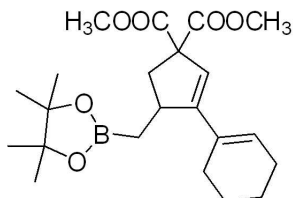

**2c**

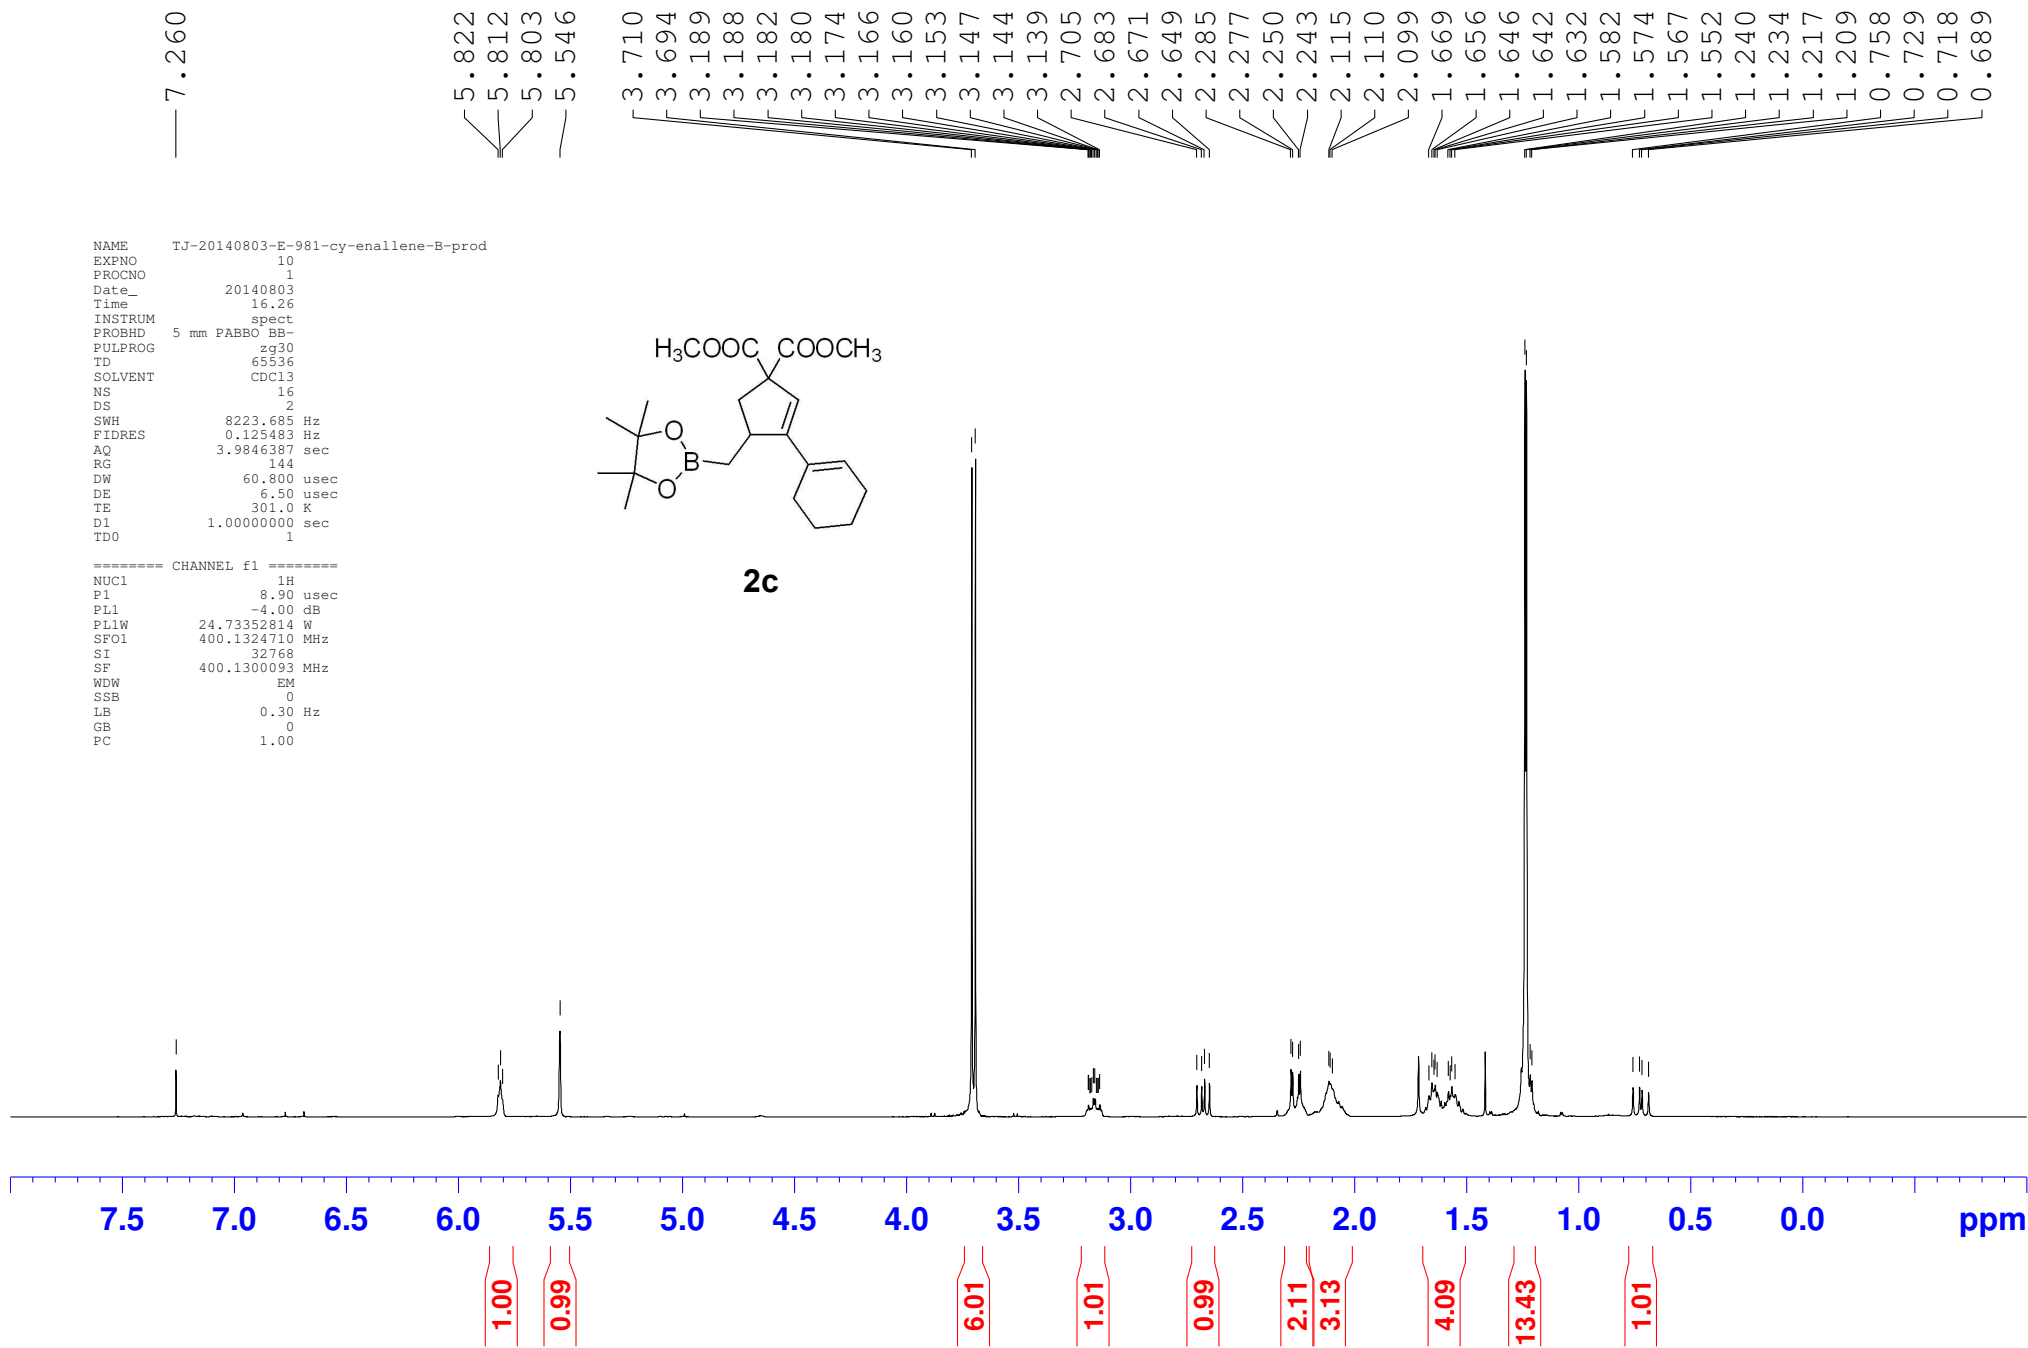

172.451  
172.326

154.366

131.597  
127.662  
119.379

83.173  
77.479  
77.160  
76.843  
65.376

52.755

39.655  
39.639  
26.581  
25.859  
25.070  
24.820  
22.762  
22.279

NAME TJ-20140803-E-981-cy-enallene-B-prod  
EXPNO 11  
PROCNO 1  
Date\_ 20140803  
Time 16.32  
INSTRUM spect  
PROBHD 5 mm PABBO BB-  
PULPROG zgpg30  
TD 65536  
SOLVENT CDCl3  
NS 64  
DS 4  
SWH 24038.461 Hz  
FIDRES 0.366798 Hz  
AQ 1.3631988 sec  
RG 2050  
DW 20.800 usec  
DE 51.93 usec  
TE 301.9 K  
D1 2.0000000 sec  
D11 0.0300000 sec  
TDO 1

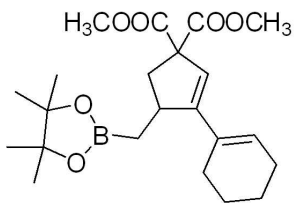

2c

===== CHANNEL f1 =====  
NUC1 13C  
P1 6.43 usec  
PL1 -3.00 dB  
PL1W 69.66502380 W  
SFO1 100.6228298 MHz

===== CHANNEL f2 =====  
CPDPRG2 waltz16  
NUC2 1H  
PCPD2 80.00 usec  
PL2 16.00 dB  
PL12 15.00 dB  
PL13 15.00 dB  
PL2W 0.24733528 W  
PL12W 0.31137666 W  
PL13W 0.31137666 W  
SFO2 400.1316005 MHz  
SI 32768  
SF 100.6127553 MHz  
WDW EM  
SSB 0  
LB 1.00 Hz  
GB 0  
PC 1.40

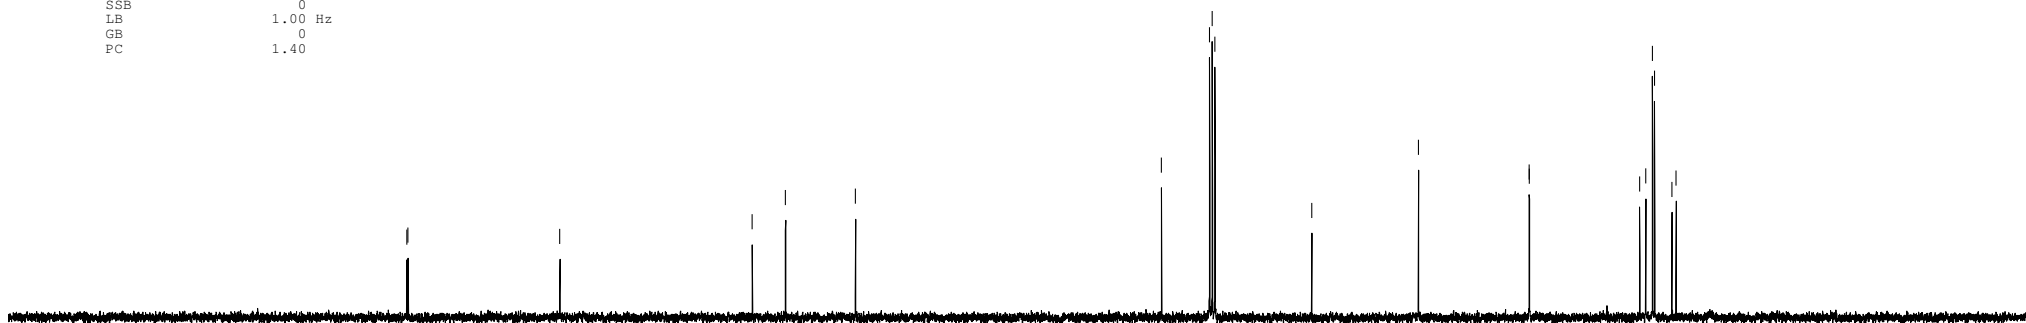

210 200 190 180 170 160 150 140 130 120 110 100 90 80 70 60 50 40 30 20 10 0 ppm

7.260  
5.800  
5.796  
5.793  
5.791  
5.516  
3.720  
3.702  
3.184  
3.175  
3.171  
3.163  
3.157  
3.146  
3.136  
3.134  
2.762  
2.740  
2.727  
2.706  
2.533  
2.528  
2.511  
2.507  
2.489  
2.466  
2.462  
2.454  
2.450  
2.445  
2.440  
2.432  
2.428  
2.410  
2.391  
2.277  
2.268  
2.242  
2.234  
1.905  
1.898  
1.890  
1.886  
1.884  
1.877  
1.869  
1.862  
1.851  
1.847  
1.317  
1.308  
1.276  
1.268  
1.243  
1.235  
0.807  
0.778  
0.767  
0.738

NAME TJ-20140809-E-993-cyclopentyl-B-prod  
EXPNO 10  
PROCNO 1  
Date\_ 20140809  
Time 12.06  
INSTRUM spect  
PROBHD 5 mm PABBO BB-  
PULPROG zg30  
TD 65536  
SOLVENT CDCl3  
NS 16  
DS 2  
SWH 8223.685 Hz  
FIDRES 0.125483 Hz  
AQ 3.9846387 sec  
RG 181  
DW 60.800 usec  
DE 6.50 usec  
TE 298.2 K  
D1 1.00000000 sec  
TDO 1

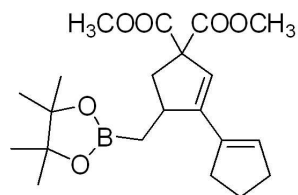

2d

===== CHANNEL f1 =====  
NUC1 1H  
P1 8.90 usec  
PL1 -4.00 dB  
PL1W 24.73352814 W  
SF01 400.1324710 MHz  
SI 32768  
SF 400.1300094 MHz  
WDW EM  
SSB 0  
LB 0.30 Hz  
GB 0  
PC 1.00

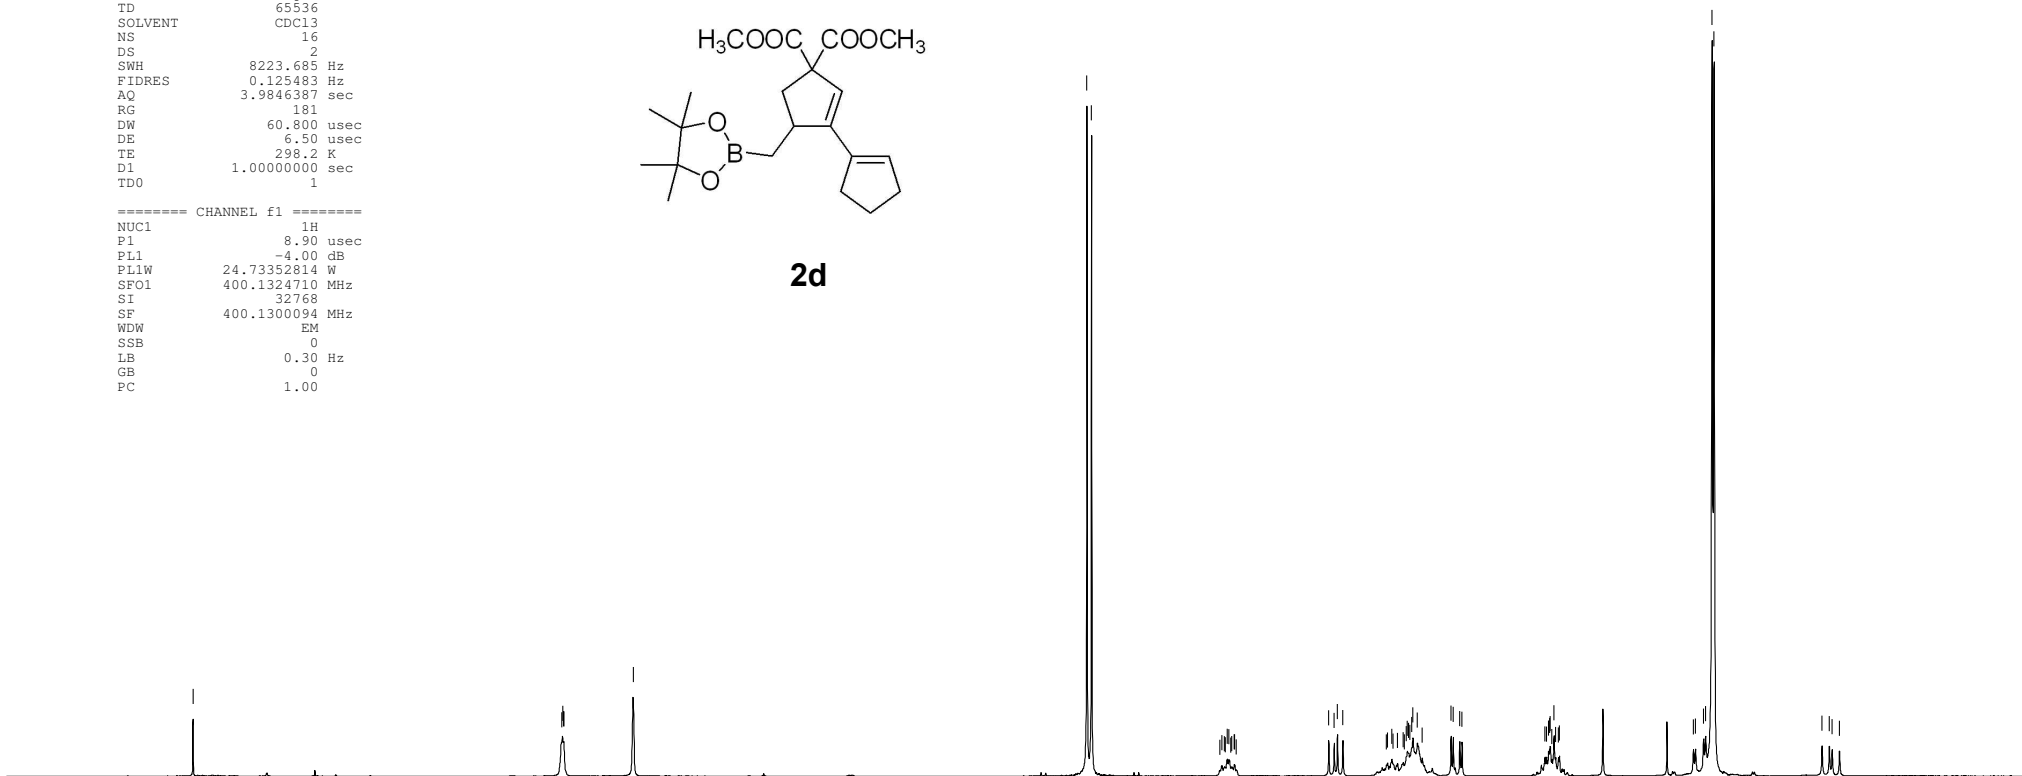

7.5 7.0 6.5 6.0 5.5 5.0 4.5 4.0 3.5 3.0 2.5 2.0 1.5 1.0 0.5 ppm

1.00  
0.99  
3.00  
2.98  
0.99  
1.00  
4.11  
1.05  
2.02  
1.17  
11.98  
1.01

NAME TJ-20140809-E-993-cyclopentyl-B-prod  
 EXPNO 1  
 PROCNO 1  
 Date\_ 20140809  
 Time 12.36  
 INSTRUM spect  
 PROBHD 5 mm PABBO BB-  
 PULPROG zgpg30  
 TD 65536  
 SOLVENT CDCl3  
 NS 360  
 DS 4  
 SWH 24038.461 Hz  
 FIDRES 0.366798 Hz  
 AQ 1.3631988 sec  
 RG 2050  
 DW 20.800 usec  
 DE 51.93 usec  
 TE 298.2 K  
 D1 2.0000000 sec  
 D11 0.0300000 sec  
 TD0 1

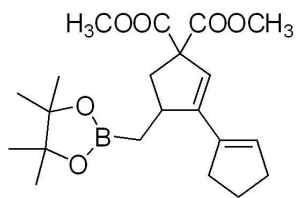

**2d**

==== CHANNEL f1 =====

NUC1 13C  
 P1 6.43 usec  
 PL1 -3.00 dB  
 PL1W 69.66502380 W  
 SFO1 100.6228298 MHz

==== CHANNEL f2 =====

CPDPRG2 waltz16  
 NUC2 1H  
 PCPD2 80.00 usec  
 PL2 16.00 dB  
 PL12 15.00 dB  
 PL13 15.00 dB  
 PL2W 0.24733528 W  
 PL12W 0.31137666 W  
 PL13W 0.31137666 W  
 SFO2 400.1316005 MHz  
 SI 32768  
 SF 100.6127558 MHz  
 WDW EM  
 SSB 0  
 LB 1.00 Hz  
 GB 0  
 PC 1.40

172.298  
172.220

149.835

138.023

130.148

122.073

83.200

77.478

77.161

76.843

65.502

52.821

40.767

39.998

33.524

33.496

25.077

24.810

23.104

18.316

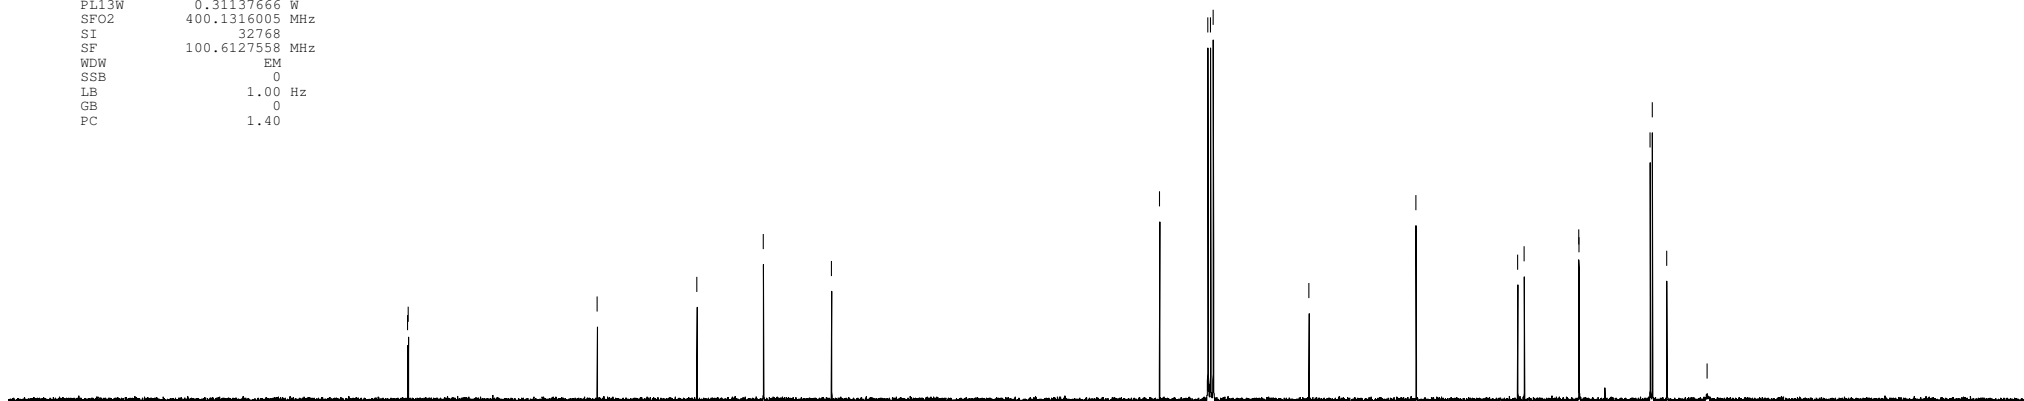

210 200 190 180 170 160 150 140 130 120 110 100 90 80 70 60 50 40 30 20 10 0 ppm

NAME TJ-20140818-E-1002-ch-B-prod-re  
 EXPNO 10  
 PROCNO 1  
 Date\_ 20140818  
 Time 16.29  
 INSTRUM spect  
 PROBHD 5 mm PABBO BB-  
 PULPROG zg30  
 TD 65536  
 SOLVENT CDCl3  
 NS 16  
 DS 2  
 SWH 8223.685 Hz  
 FIDRES 0.125483 Hz  
 AQ 3.9846387 sec  
 RG 181  
 DW 60.800 usec  
 DE 6.50 usec  
 TE 298.2 K  
 D1 1.0000000 sec  
 TDO 1

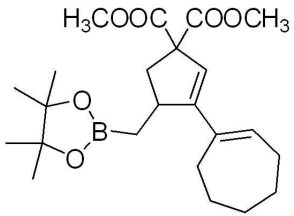

2e

===== CHANNEL f1 =====  
 NUC1 1H  
 P1 8.90 usec  
 PL1 -4.00 dB  
 PL1W 24.73352814 W  
 SFO1 400.1324710 MHz  
 SI 32768  
 SF 400.1300093 MHz  
 WDW EM  
 SSB 0  
 LB 0.30 Hz  
 GB 0  
 PC 1.00

7.260  
 5.941  
 5.924  
 5.907  
 5.561  
 3.719  
 3.700  
 3.170  
 3.159  
 3.148  
 3.141  
 3.130  
 3.120  
 3.112  
 2.764  
 2.743  
 2.730  
 2.709  
 2.365  
 2.351  
 2.348  
 2.336  
 2.319  
 2.234  
 2.225  
 2.200  
 2.196  
 2.190  
 2.186  
 1.753  
 1.738  
 1.723  
 1.501  
 1.497  
 1.492  
 1.476  
 1.462  
 1.242  
 1.236  
 1.211  
 1.211  
 0.728  
 0.699  
 0.688  
 0.659

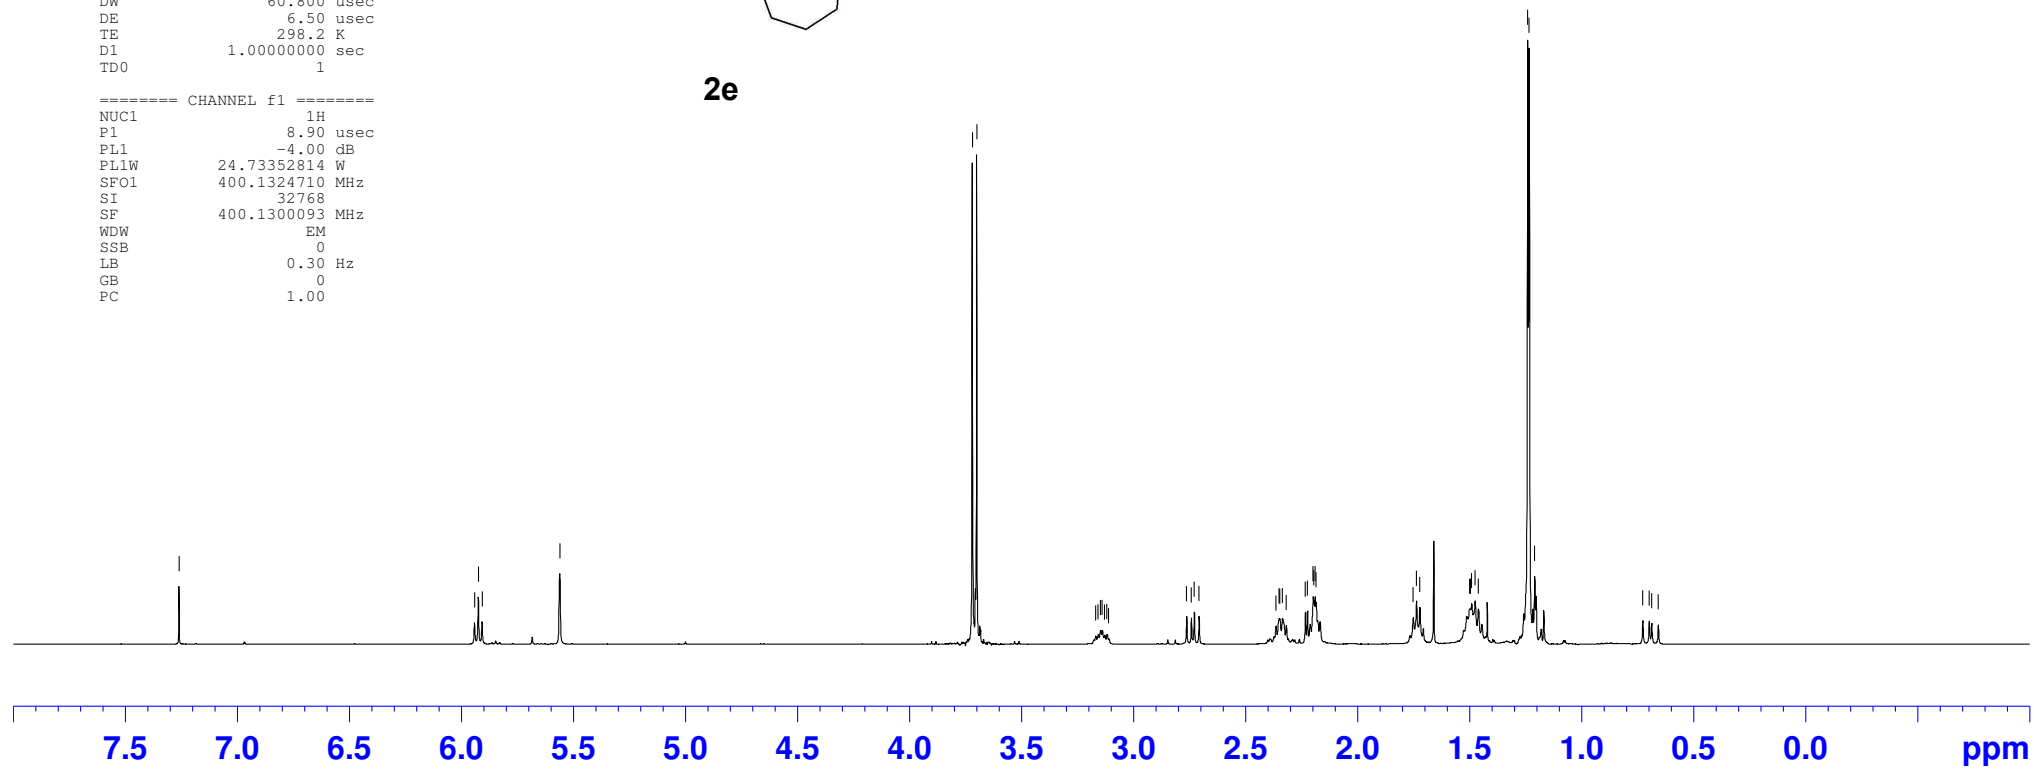

7.5 7.0 6.5 6.0 5.5 5.0 4.5 4.0 3.5 3.0 2.5 2.0 1.5 1.0 0.5 0.0 ppm

```

NAME      TJ-20140818-E-1002-ch-B-prod-re
EXPNO     12
PROCNO    1
Date_     20140818
Time      16.48
INSTRUM   spect
PROBHD    5 mm PABBO BB-
PULPROG   zgpg30
TD        65536
SOLVENT   CDCl3
NS        64
DS        4
SWH       24038.461 Hz
FIDRES    0.366798 Hz
AQ        1.3631988 sec
RG        2050
DW        20.800 usec
DE        51.93 usec
TE        298.2 K
D1        2.00000000 sec
D11       0.03000000 sec
TD0       1

```

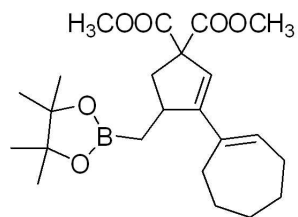

**2e**

```

===== CHANNEL f1 =====
NUC1      13C
P1        6.43 usec
PL1       -3.00 dB
PL1W      69.66502380 W
SFO1      100.6228298 MHz

```

```

===== CHANNEL f2 =====
CPDPRG2   waltz16
NUC2      1H
PCPD2     80.00 usec
PL2       16.00 dB
PL12      15.00 dB
PL13      15.00 dB
PL2W      0.24733528 W
PL12W     0.31137666 W
PL13W     0.31137666 W
SFO2      400.1316005 MHz
SI        32768
SF        100.6127555 MHz
WDW       EM
SSB       0
LB        1.00 Hz
GB        0
PC        1.40

```

172.368  
172.352  
— 155.483  
— 139.156  
— 131.972  
— 119.803  
83.175  
77.478  
77.160  
76.843  
— 65.267  
52.782  
52.771  
39.972  
39.666  
32.503  
30.955  
28.635  
26.761  
26.499  
25.092  
24.831

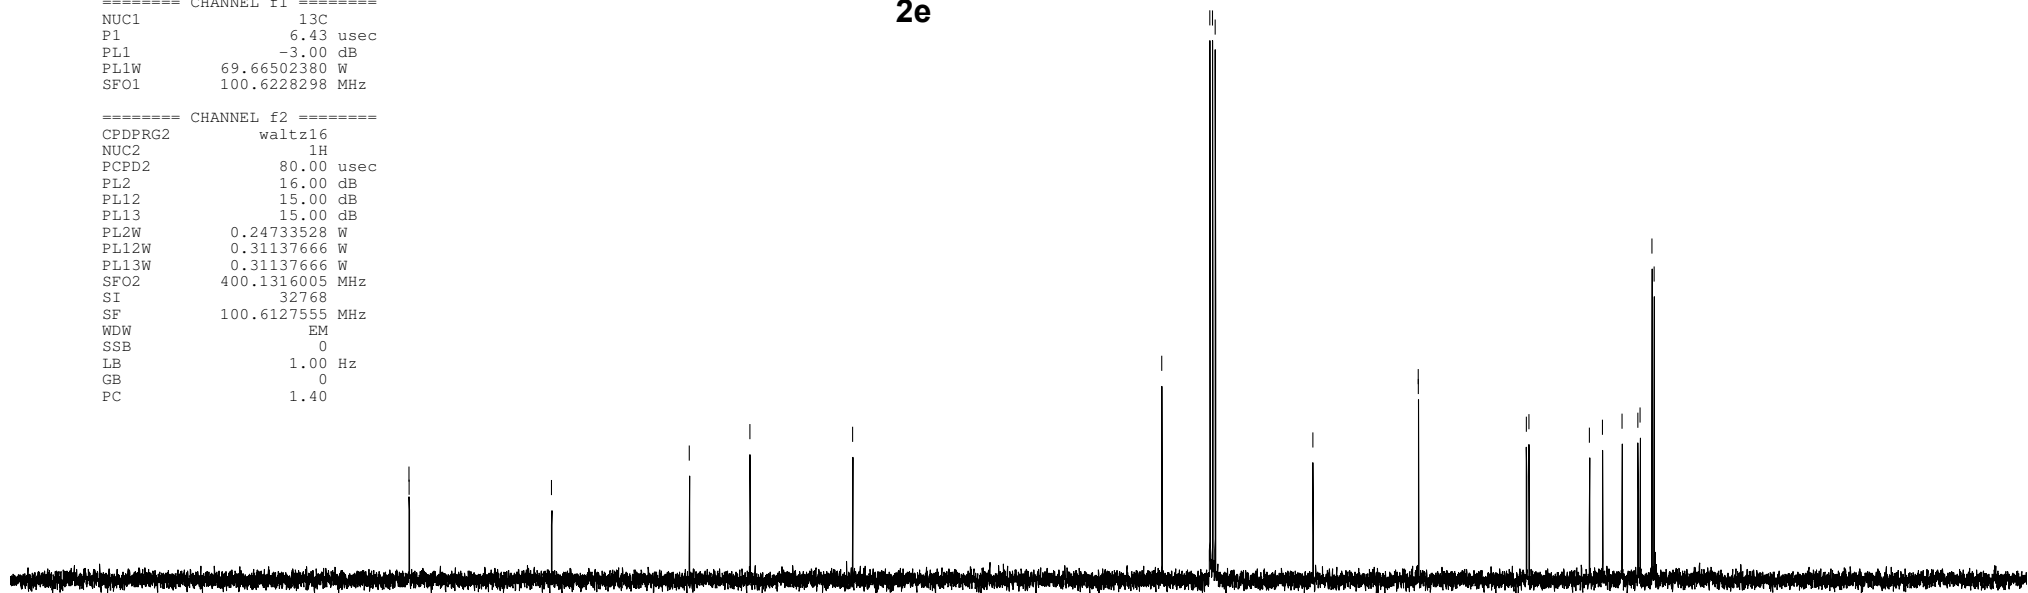

210 200 190 180 170 160 150 140 130 120 110 100 90 80 70 60 50 40 30 20 10 0 ppm

— 7.260

NAME TJ-20140902-E-1015-co-B-rac-prod  
EXPNO 10  
PROCNO 1  
Date\_ 20140902  
Time 23.56  
INSTRUM spect  
PROBHD 5 mm PABBO BB/  
PULPROG zg30  
TD 65536  
SOLVENT CDCl3  
NS 16  
DS 2  
SWH 8012.820 Hz  
FIDRES 0.122266 Hz  
AQ 4.0894966 sec  
RG 29.53  
DW 62.400 usec  
DE 6.50 usec  
TE 298.2 K  
D1 1.00000000 sec  
TD0 1

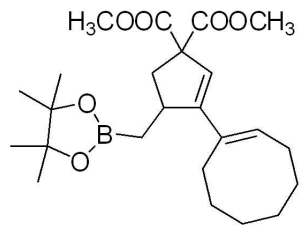

2f

==== CHANNEL f1 =====  
SFO1 400.2424716 MHz  
NUC1 1H  
P1 9.40 usec  
SI 65536  
SF 400.2400095 MHz  
WDW EM  
SSB 0  
LB 0.30 Hz  
GB 0  
PC 1.00

5.775  
5.754  
5.733  
5.607  
3.712  
3.695  
3.200  
3.193  
3.184  
3.178  
3.172  
3.164  
3.156  
3.149  
3.143  
3.135  
2.714  
2.692  
2.679  
2.658  
2.409  
2.395  
2.378  
2.287  
2.280  
2.253  
2.245  
2.200  
2.196  
2.189  
2.178  
2.169  
1.523  
1.511  
1.443  
1.429  
1.416  
1.402  
1.290  
1.282  
1.245  
1.239  
0.727  
0.697  
0.686  
0.657

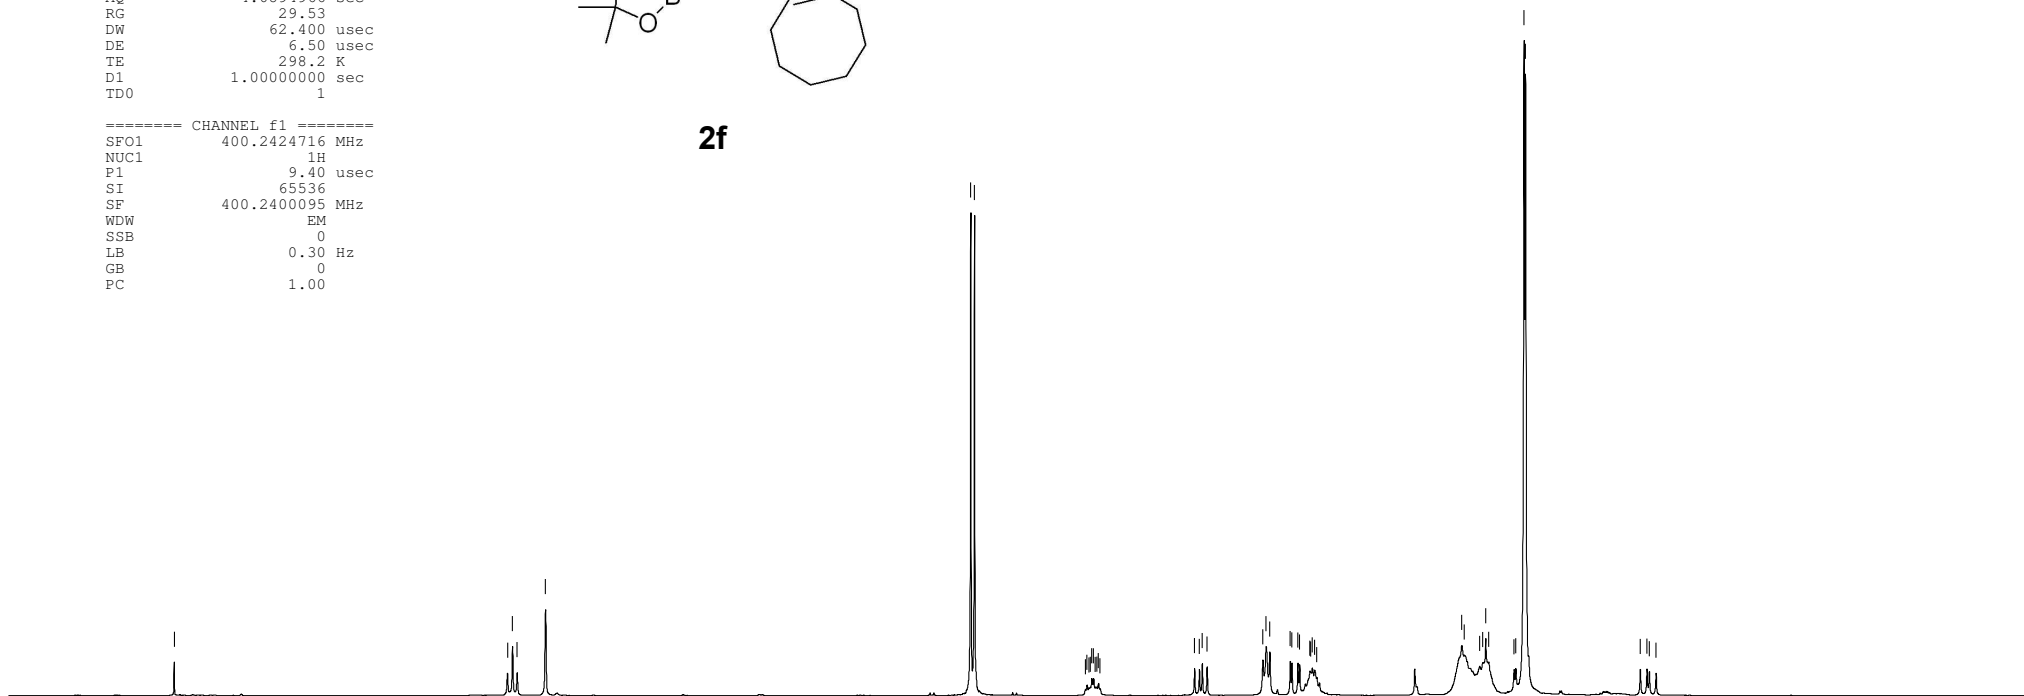

7.5 7.0 6.5 6.0 5.5 5.0 4.5 4.0 3.5 3.0 2.5 2.0 1.5 1.0 0.5 0.0 ppm

1.00  
0.99  
3.10  
3.03  
1.03  
1.02  
2.01  
1.11  
2.04  
8.13  
1.10  
5.98  
5.94  
1.08



172.411  
172.318

153.649

135.000  
130.442

120.263

83.186  
77.478  
77.160  
76.843  
65.321

52.769  
39.703  
39.517  
30.296  
28.957  
27.212  
27.032  
26.889  
26.214  
25.071  
24.822  
18.172

NAME TJ-20140902-E-1015-co-B-rac-prod  
EXPNO 12  
PROCNO 1  
Date\_ 20140903  
Time 0.54  
INSTRUM spect  
PROBHD 5 mm PABBO BB/  
PULPROG zgpg30  
TD 65536  
SOLVENT CDCl3  
NS 876  
DS 4  
SWH 24038.461 Hz  
FIDRES 0.366798 Hz  
AQ 1.3631988 sec  
RG 191.9  
DW 20.800 usec  
DE 6.50 usec  
TE 298.2 K  
D1 2.00000000 sec  
D11 0.03000000 sec  
TD0 1

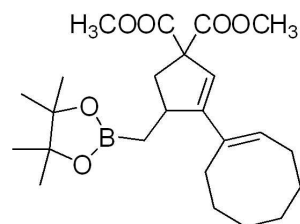

2f

==== CHANNEL f1 =====  
SFO1 100.6504912 MHz  
NUC1 13C  
P1 9.20 usec  
SI 32768  
SF 100.6404162 MHz  
WDW EM  
SSB 0  
LB 1.00 Hz  
GB 0  
PC 1.40

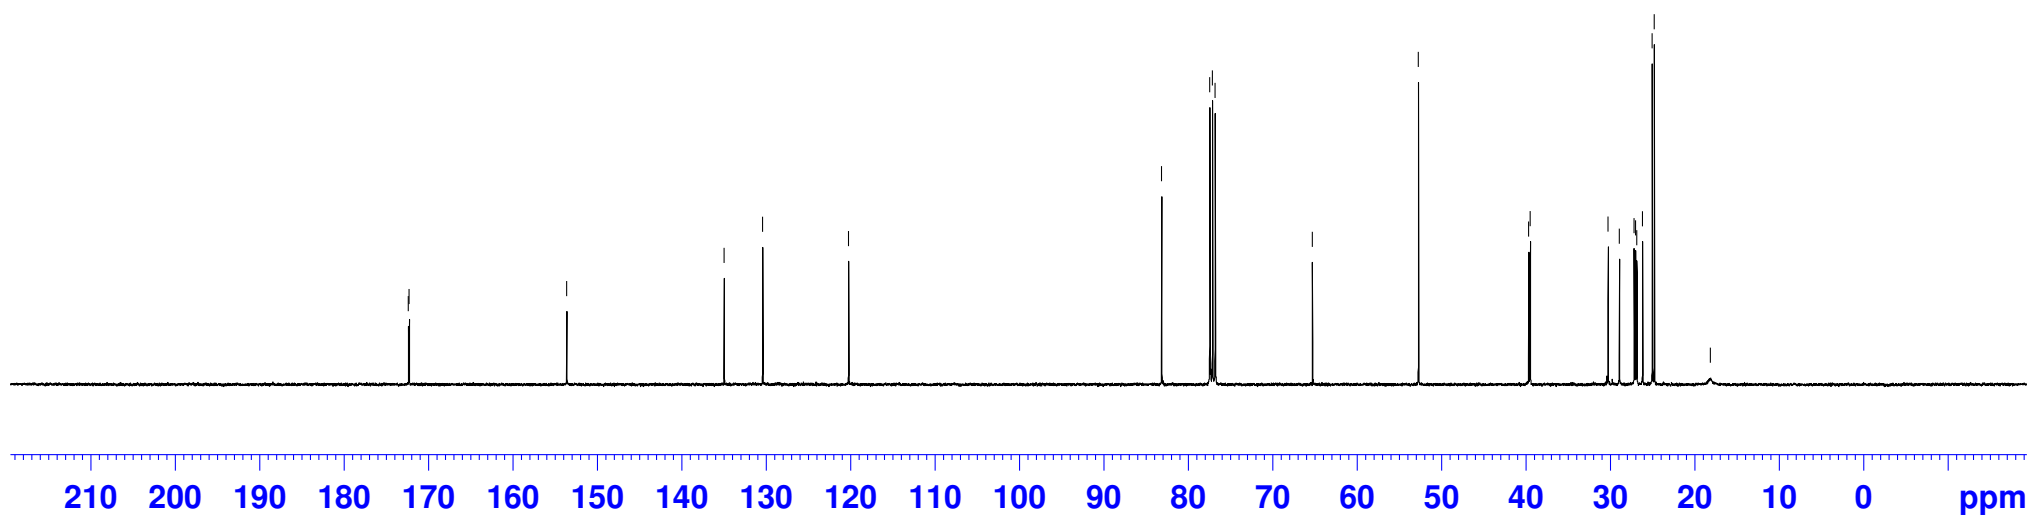

NAME TJ-20140718-E-947-HMe-B-prod-re2  
 EXPNO 10  
 PROCNO 1  
 Date\_ 20140718  
 Time 17.31  
 INSTRUM spect  
 PROBHD 5 mm PABBO BB-  
 PULPROG zg30  
 TD 65536  
 SOLVENT CDCl3  
 NS 16  
 DS 2  
 SWH 8223.685 Hz  
 FIDRES 0.125483 Hz  
 AQ 3.9846387 sec  
 RG 203  
 DW 60.800 usec  
 DE 6.50 usec  
 TE 298.2 K  
 D1 1.00000000 sec  
 TD0 1

===== CHANNEL f1 =====  
 NUC1 1H  
 P1 8.90 usec  
 PL1 -4.00 dB  
 PL1W 24.73352814 W  
 SFO1 400.1324710 MHz  
 SI 32768  
 SF 400.1300095 MHz  
 WDW EM  
 SSB 0  
 LB 0.30 Hz  
 GB 0  
 PC 1.00

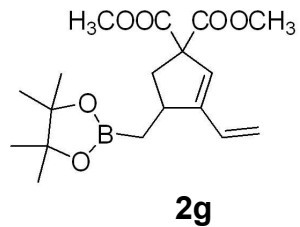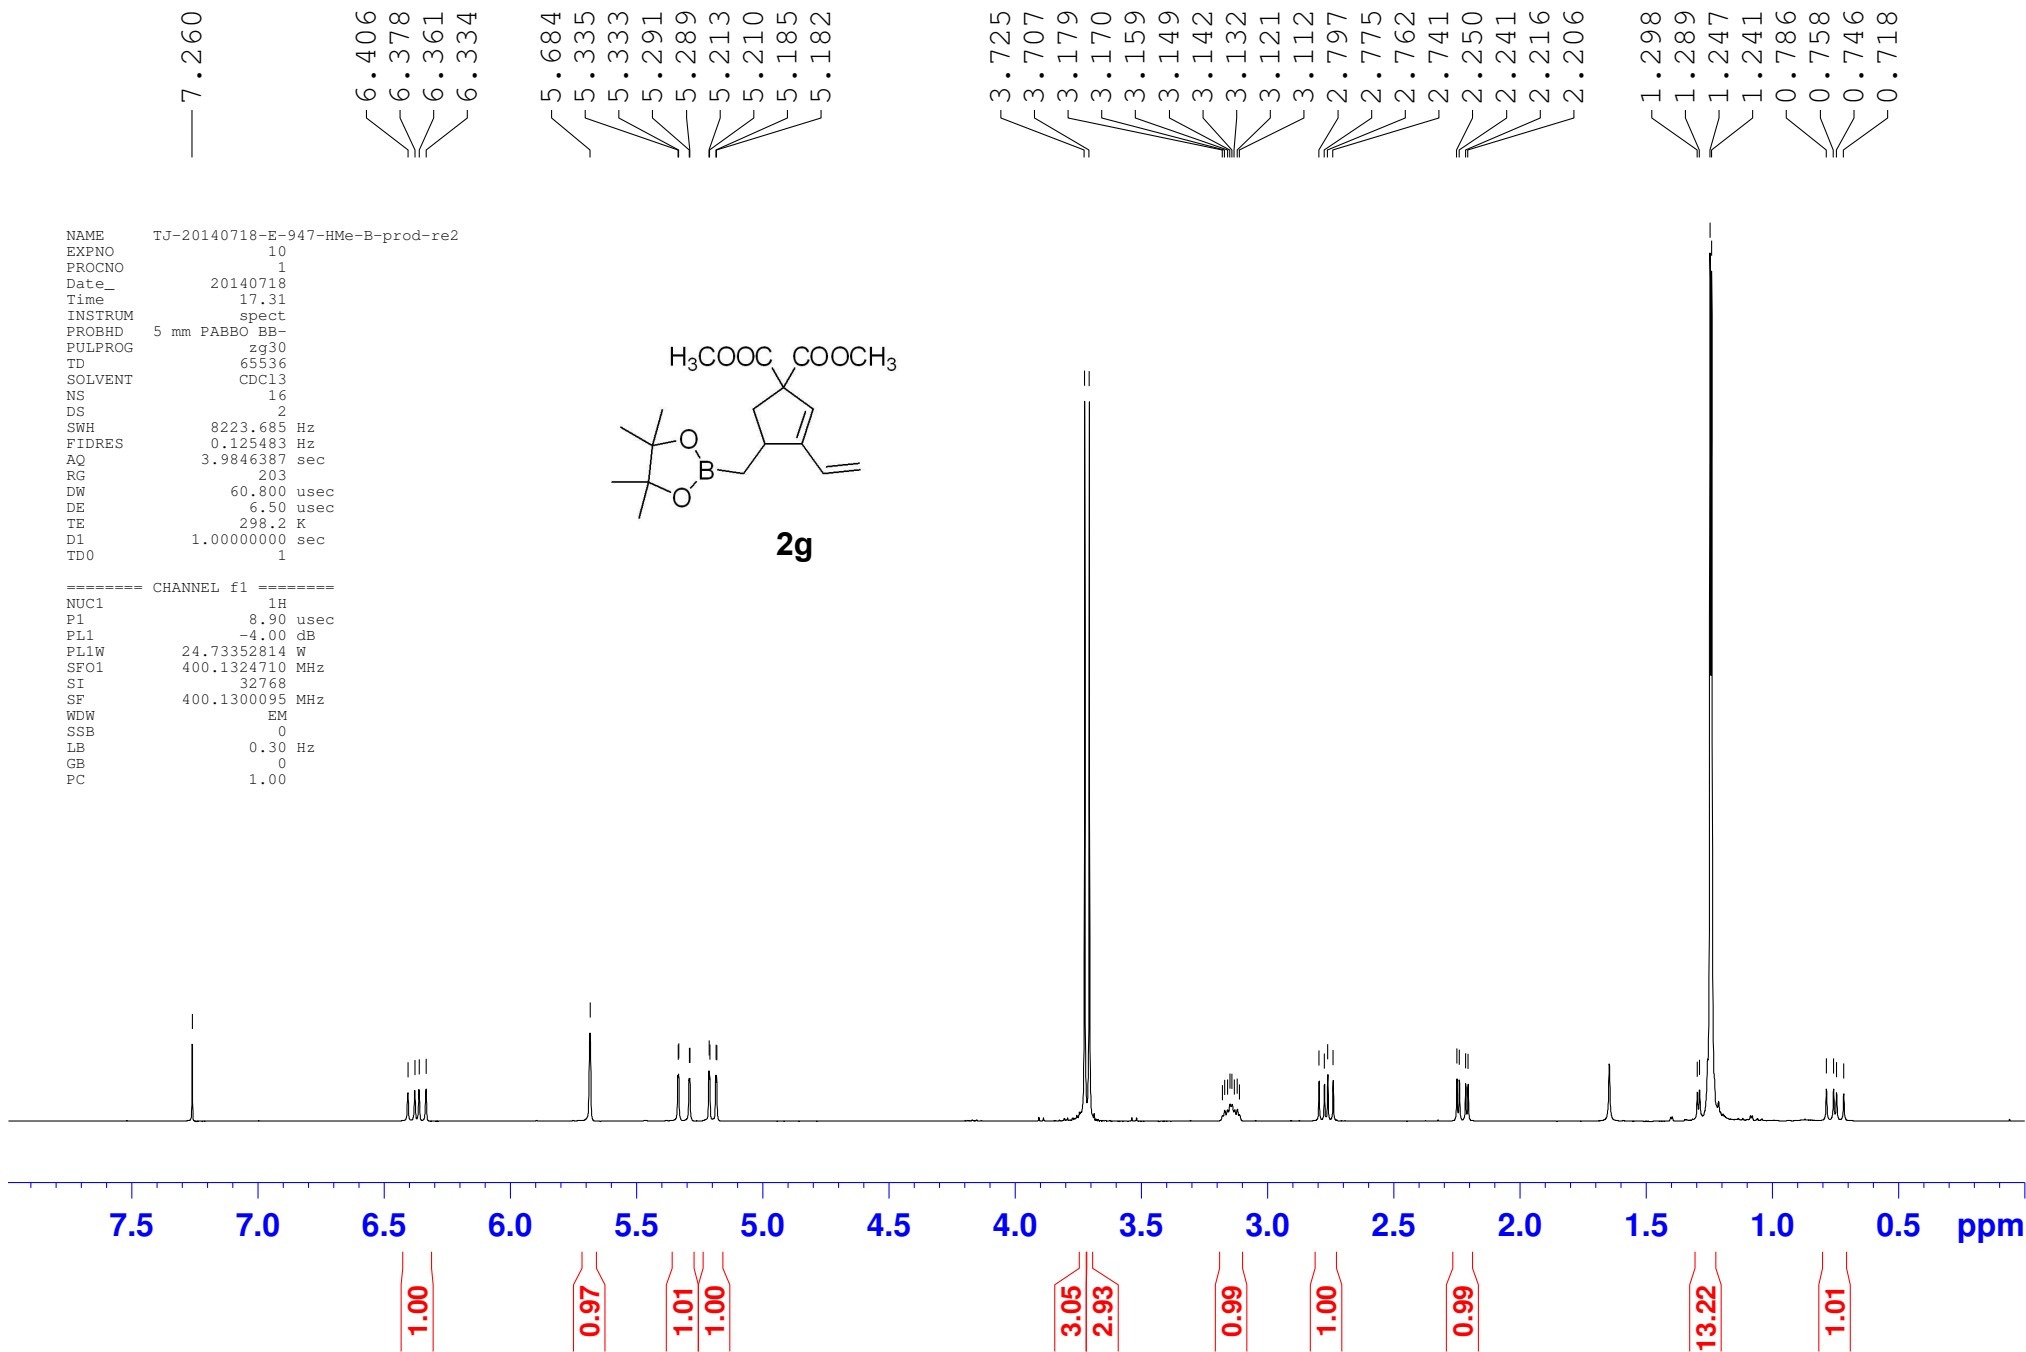

< 171.968  
171.944

— 151.728

— 131.424

— 125.276

— 117.503

< 83.301

< 77.478

< 77.160

< 76.843

— 65.268

— 52.873

< 40.048

< 39.427

< 25.078

< 24.816

NAME TJ-20140718-E-947-HMe-B-prod-re2  
EXPNO 14  
PROCNO 1  
Date\_ 20140719  
Time\_ 12.56  
INSTRUM spect  
PROBHD 5 mm PABBO BB-  
PULPROG zgpg30  
TD 65536  
SOLVENT CDCl3  
NS 384  
DS 4  
SWH 24038.461 Hz  
FIDRES 0.366798 Hz  
AQ 1.3631988 sec  
RG 2050  
DW 20.800 usec  
DE 51.93 usec  
TE 298.2 K  
D1 2.0000000 sec  
D11 0.0300000 sec  
TD0 1

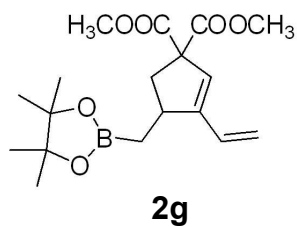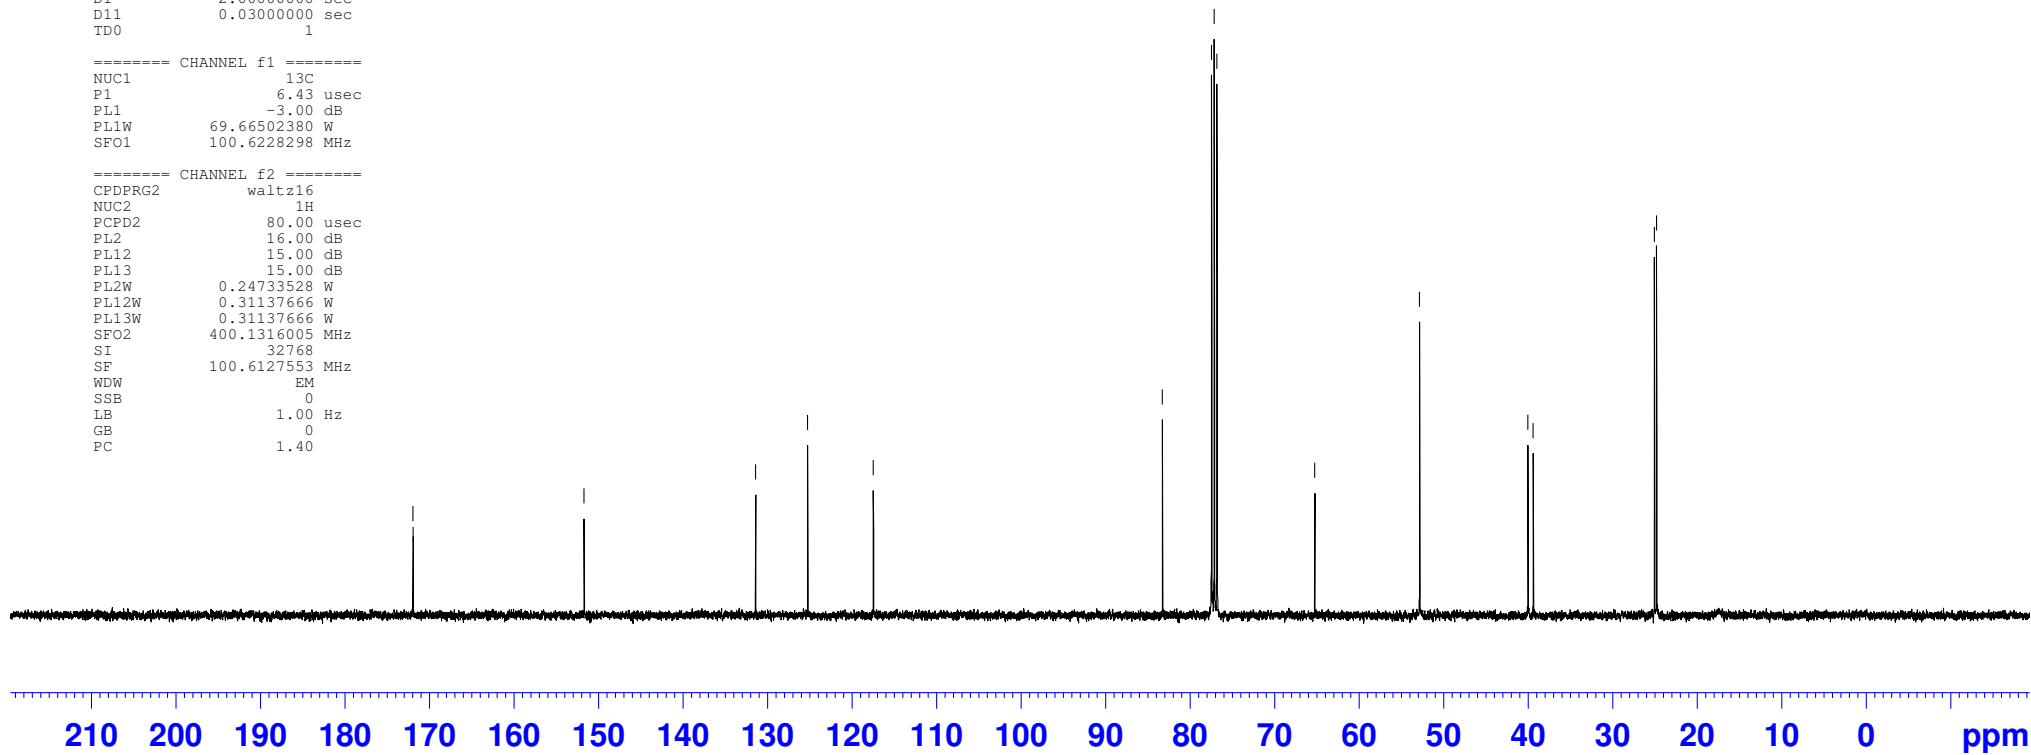

7.337  
7.333  
7.331  
7.327  
7.312  
7.307  
7.297  
7.293  
7.287  
7.271  
7.260

5.605  
5.601  
5.330  
5.327  
5.261  
5.258

3.740  
3.691  
3.288  
3.280  
3.276  
3.268  
3.264  
3.260  
3.252  
3.248  
3.240  
2.911  
2.890  
2.877  
2.856  
2.239  
2.227  
2.204  
2.192

1.262  
1.253  
1.227  
0.817  
0.789  
0.777  
0.749

NAME TJ-20140628-E-921-MePh-enallene-B-prod  
EXPNO 10  
PROCNO 1  
Date\_ 20140628  
Time 18.29  
INSTRUM spect  
PROBHD 5 mm PABBO BB-  
PULPROG zg30  
TD 65536  
SOLVENT CDCl3  
NS 16  
DS 2  
SWH 8223.685 Hz  
FIDRES 0.125483 Hz  
AQ 3.9846387 sec  
RG 101  
DW 60.800 usec  
DE 6.50 usec  
TE 298.2 K  
D1 1.00000000 sec  
TD0 1

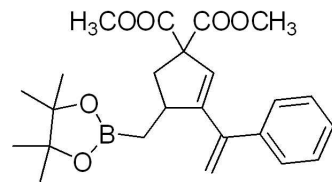

2h

===== CHANNEL f1 =====  
NUC1 1H  
P1 8.90 usec  
PL -4.00 dB  
P1LW 24.73352814 W  
SFO1 400.1324710 MHz  
SI 32768  
SF 400.1300093 MHz  
WDW EM  
SSB 0  
LB 0.30 Hz  
GB 0  
PC 1.00

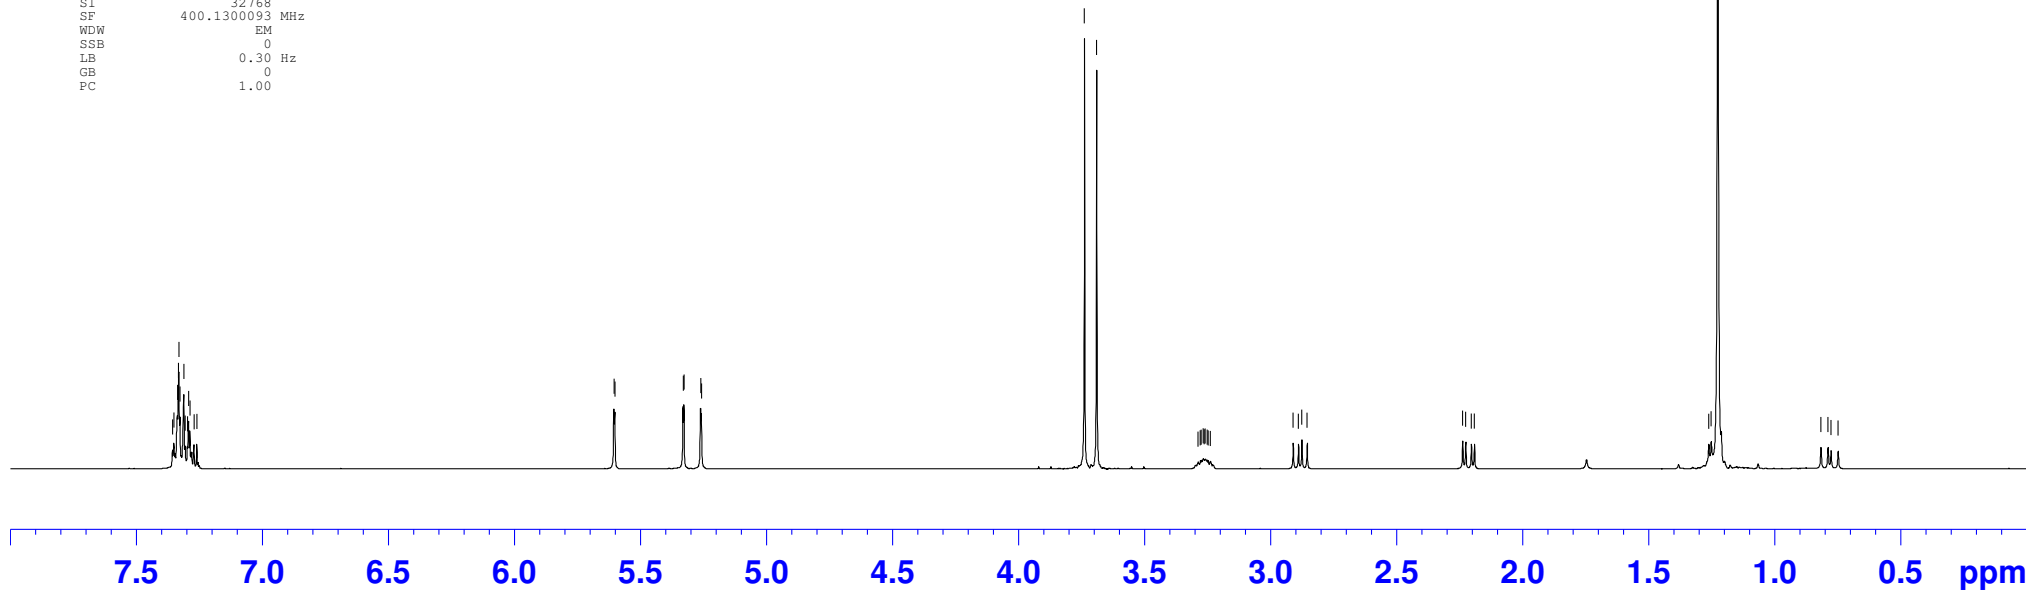

5.37

1.00

1.04

1.02

3.04

3.02

1.04

1.03

1.04

13.55

1.04

172.034  
171.804

153.391

144.314  
140.878

128.212  
128.019  
127.643  
126.236  
116.017

83.223  
77.478  
77.159  
76.842  
65.518

52.818  
52.804

40.751  
39.818

25.046  
24.785  
17.061

```
NAME TJ-20140628-E-921-MePh-enallene-B-prod
EXPNO 12
PROCNO 1
Date_ 20140629
Time 2.30
INSTRUM spect
PROBHD 5 mm PABBO BB-
PULPROG zgpg30
TD 65536
SOLVENT CDC13
NS 384
DS 4
SWH 24038.461 Hz
FIDRES 0.366798 Hz
AQ 1.3631988 sec
RG 2050
DW 20.800 usec
DE 51.93 usec
TE 298.2 K
D1 2.00000000 sec
D11 0.03000000 sec
TD0 1
```

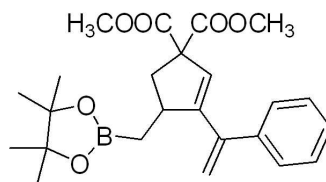

2h

```
===== CHANNEL f1 =====
NUC1 13C
P1 6.43 usec
PL1 -3.00 dB
PL1W 69.66502380 W
SFO1 100.6228298 MHz
```

```
===== CHANNEL f2 =====
CPDPRG2 waltz16
NUC2 1H
PCPD2 80.00 usec
PL2 16.00 dB
PL12 15.00 dB
PL13 15.00 dB
PL2W 0.24733528 W
PL12W 0.31137666 W
PL13W 0.31137666 W
SFO2 400.1316005 MHz
SI 32768
SF 100.6127593 MHz
WDW EM
SSB 0
LB 1.00 Hz
GB 0
PC 1.40
```

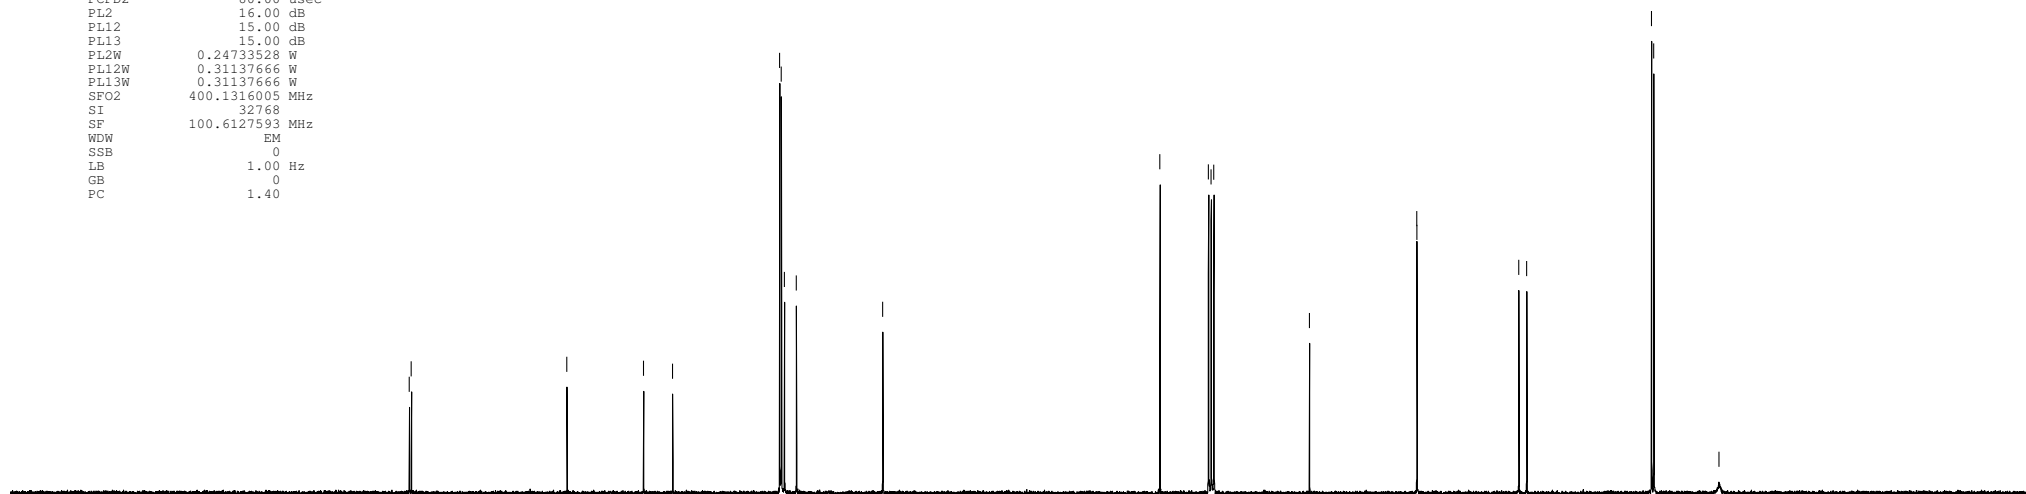

210 200 190 180 170 160 150 140 130 120 110 100 90 80 70 60 50 40 30 20 10 0 ppm

NAME TJ-20140728-E-969-2Me-allyl-B-prod  
 EXPNO 10  
 PROCNO 1  
 Date\_ 20140728  
 Time\_ 14.39  
 INSTRUM spect  
 PROBHD 5 mm PABBO BB-  
 PULPROG zg30  
 TD 65536  
 SOLVENT CDCl3  
 NS 16  
 DS 2  
 SWH 8223.685 Hz  
 FIDRES 0.125483 Hz  
 AQ 3.9846387 sec  
 RG 128  
 DW 60.800 usec  
 DE 6.50 usec  
 TE 298.2 K  
 D1 1.00000000 sec  
 TD0 1

===== CHANNEL f1 =====  
 NUC1 1H  
 P1 8.90 usec  
 PL1 -4.00 dB  
 PLLW 24.73352814 W  
 SFO1 400.1324710 MHz  
 SI 32768  
 SF 400.1300094 MHz  
 WDW EM  
 SSB 0  
 LB 0.30 Hz  
 GB 0  
 PC 1.00

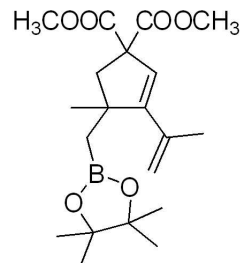

7.260

5.640

5.137

5.022

5.019

5.015

3.716

3.712

2.643

2.609

2.482

2.447

1.895

1.315

1.303

1.264

1.198

1.090

1.052

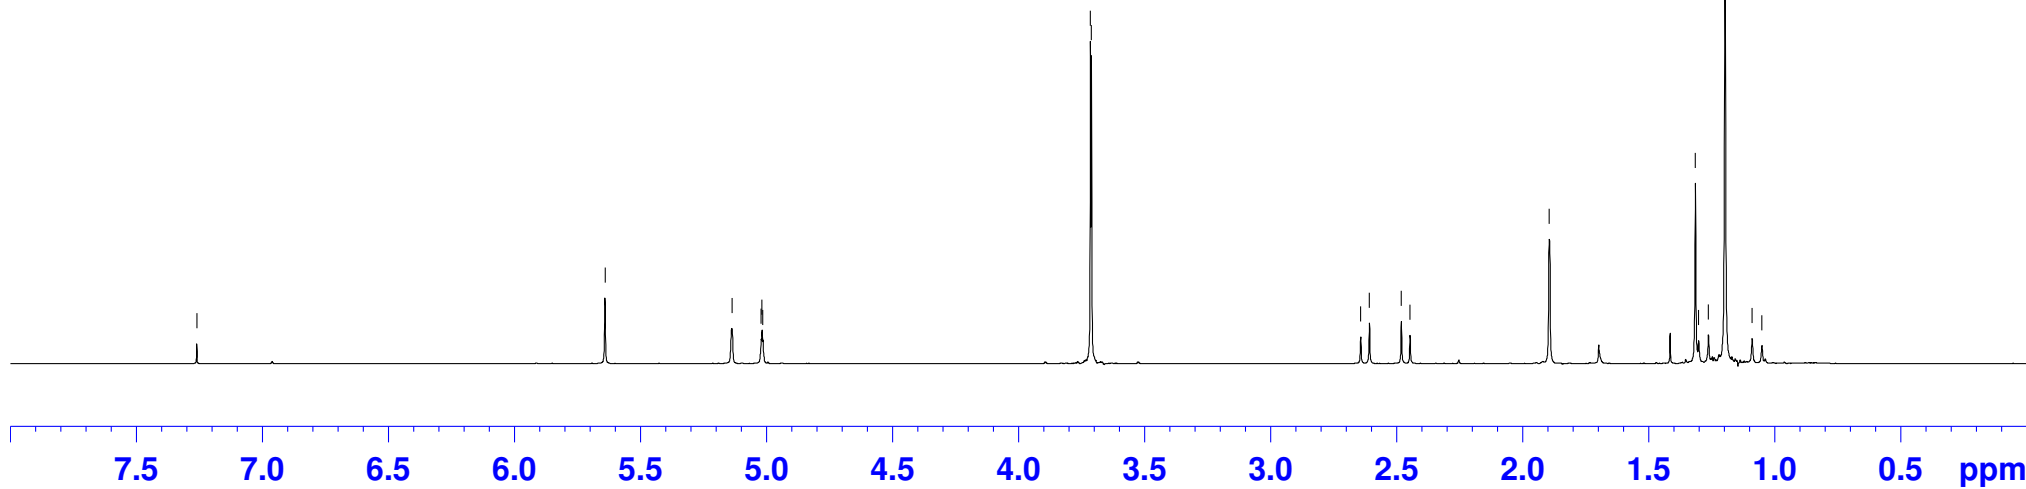

1.00

1.02

1.02

6.20

1.03

1.03

3.09

3.44

1.19

12.28

1.22

7.5

7.0

6.5

6.0

5.5

5.0

4.5

4.0

3.5

3.0

2.5

2.0

1.5

1.0

0.5

ppm

```

NAME      TJ-20140728-E-969-2Me-allyl-B-prod
EXPNO     1
PROCNO    1
Date_     20140728
Time      14.56
INSTRUM   spect
PROBHD    5 mm PABBO BB-
PULPROG   zgpg30
TD         65536
SOLVENT   CDCl3
NS         64
DS         4
SWH        24038.461 Hz
FIDRES     0.366798 Hz
AQ         1.3631988 sec
RG         2050
DW         20.800 usec
DE         51.93 usec
TE         298.2 K
D1         2.0000000 sec
D11        0.0300000 sec
TD0        1

```

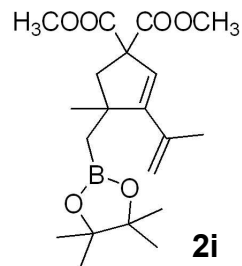

```

===== CHANNEL f1 =====
NUC1      13C
P1         6.43 usec
PL1        -3.00 dB
PL1W       69.66502380 W
SFO1      100.6228298 MHz

===== CHANNEL f2 =====
CPDPRG2   waltz16
NUC2       1H
PCPD2      80.00 usec
PL2        16.00 dB
PL12       15.00 dB
PL13       15.00 dB
PL2W       0.24733528 W
PL12W      0.31137666 W
PL13W      0.31137666 W
SFO2      400.1316005 MHz
SI         32768
SF         100.6127560 MHz
WDW        EM
SSB        0
LB         1.00 Hz
GB         0
PC         1.40

```

172.126  
 172.035  
 — 155.986  
 — 138.093  
 — 123.757  
 — 115.226  
 83.020  
 77.478  
 77.160  
 76.842  
 — 63.480  
 52.854  
 52.735  
 47.931  
 47.802  
 29.174  
 24.932  
 24.866  
 23.666

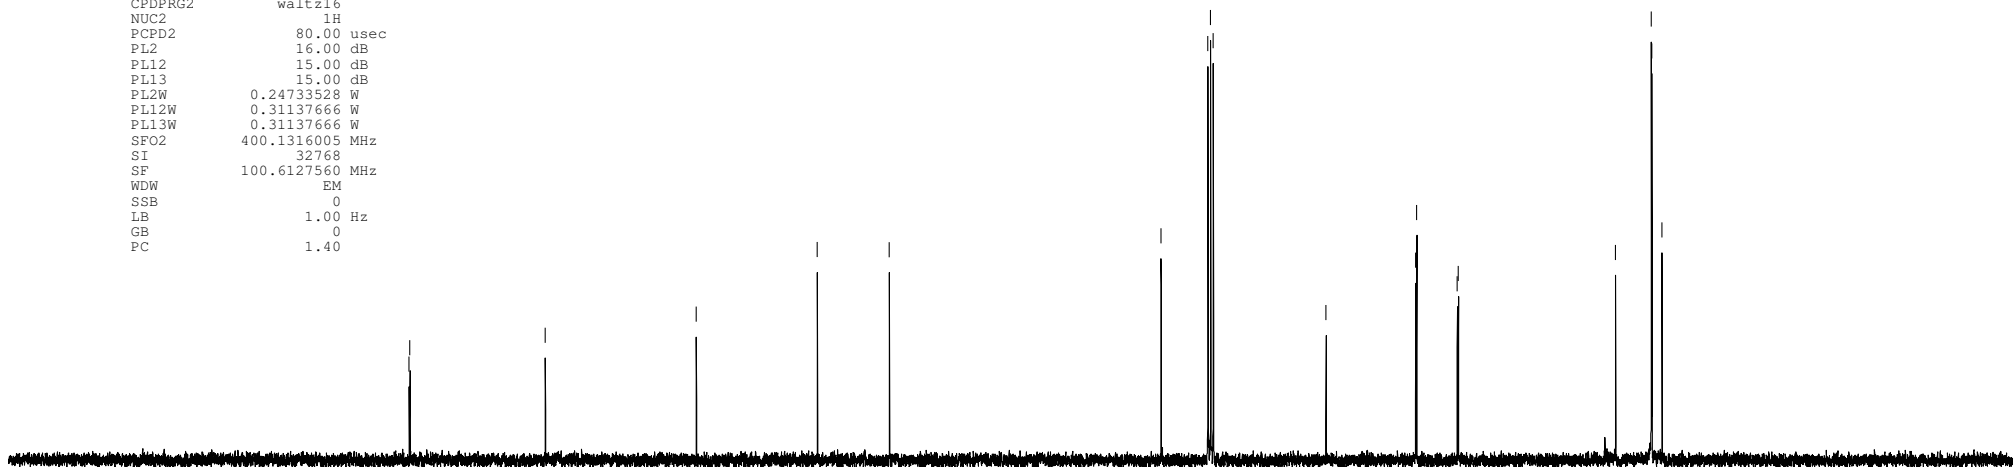

210 200 190 180 170 160 150 140 130 120 110 100 90 80 70 60 50 40 30 20 10 0 ppm

7.241  
7.234  
7.226  
7.220  
7.208  
7.206  
7.163  
7.156  
7.149  
7.147  
7.141  
7.133

5.770  
5.767

4.944  
4.940  
4.937  
4.911

3.768  
3.674  
3.511  
3.500  
3.497  
3.490  
3.486  
3.480  
3.476  
3.465  
3.462

2.931  
2.916

2.729  
2.708  
2.694  
2.673  
2.644  
2.630  
2.609  
2.595  
1.855

1.207  
1.183

NAME TJ-20140716-E-951-cis-cinna-B-prod  
EXPNO 12  
PROCNO 1  
Date\_ 20140717  
Time 3.08  
INSTRUM spect  
PROBHD 5 mm PABBO BB-  
PULPROG zg30  
TD 65536  
SOLVENT CDCl3  
NS 16  
DS 2  
SWH 8223.685 Hz  
FIDRES 0.125483 Hz  
AQ 3.9846387 sec  
RG 90.5  
DW 60.800 usec  
DE 6.50 usec  
TE 298.2 K  
D1 1.00000000 sec  
TDO 1

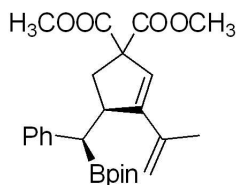

**2k**

===== CHANNEL f1 =====  
NUC1 1H  
P1 8.90 usec  
PL1 -4.00 dB  
PL1W 24.73352814 W  
SFO1 400.1324710 MHz  
SI 32768  
SF 400.1300094 MHz  
WDW EM  
SSB 0  
LB 0.30 Hz  
GB 0  
PC 1.00

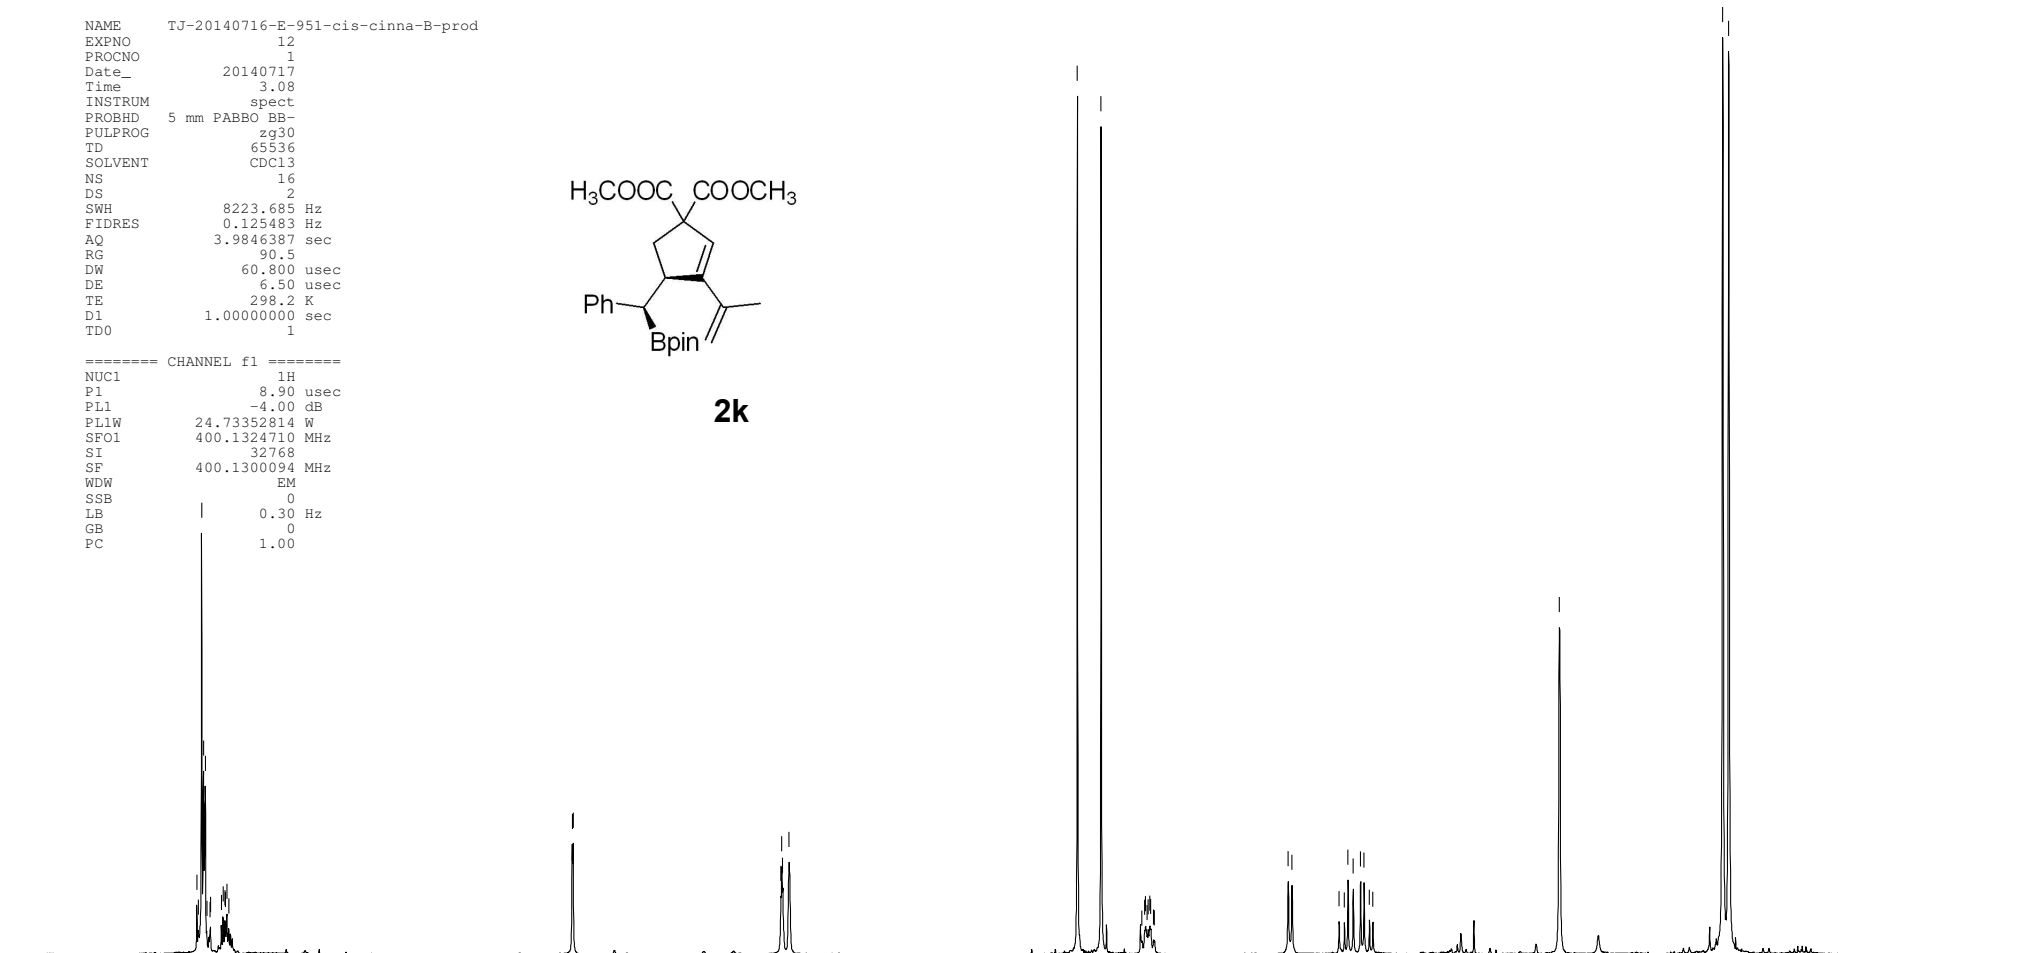

7.5 7.0 6.5 6.0 5.5 5.0 4.5 4.0 3.5 3.0 2.5 2.0 1.5 1.0 0.5 ppm

4.09  
1.12

1.00

1.03  
1.00

3.05  
3.02  
1.04

1.01  
1.08  
1.05

3.05

12.57



< 171.863  
< 171.815

— 152.163

— 141.933  
— 138.576

< 129.538  
< 128.357  
< 125.691  
< 124.186  
— 115.182

< 83.381  
< 77.478  
< 77.160  
< 76.843  
— 65.308

< 52.905  
< 52.603  
— 48.138

— 36.526

< 24.865  
< 24.638  
< 21.590

NAME TJ-20140716-E-951-cis-cinna-B-prod  
EXPNO 11  
PROCNO 1  
Date\_ 20140716  
Time 19.57  
INSTRUM spect  
PROBHD 5 mm PABBO BB-  
PULPROG zgpg30  
TD 65536  
SOLVENT CDC13  
NS 172  
DS 4  
SWH 24038.461 Hz  
FIDRES 0.366798 Hz  
AQ 1.3631988 sec  
RG 2050  
DW 20.800 usec  
DE 51.93 usec  
TE 298.2 K  
D1 2.0000000 sec  
D11 0.0300000 sec  
TD0 1

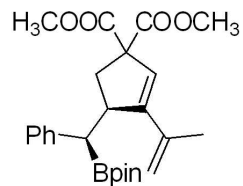

2k

==== CHANNEL f1 =====  
NUC1 13C  
P1 6.43 usec  
PL1 -3.00 dB  
PL1W 69.66502380 W  
SFO1 100.6228298 MHz

==== CHANNEL f2 =====  
CPDPRG2 waltz16  
NUC2 1H  
PCPD2 80.00 usec  
PL2 16.00 dB  
PL12 15.00 dB  
PL13 15.00 dB  
PL2W 0.24733528 W  
PL12W 0.31137666 W  
PL13W 0.31137666 W  
SFO2 400.1316005 MHz  
SI 32768  
SF 100.6127600 MHz  
WDW EM  
SSB 0  
LB 1.00 Hz  
GB 0  
PC 1.40

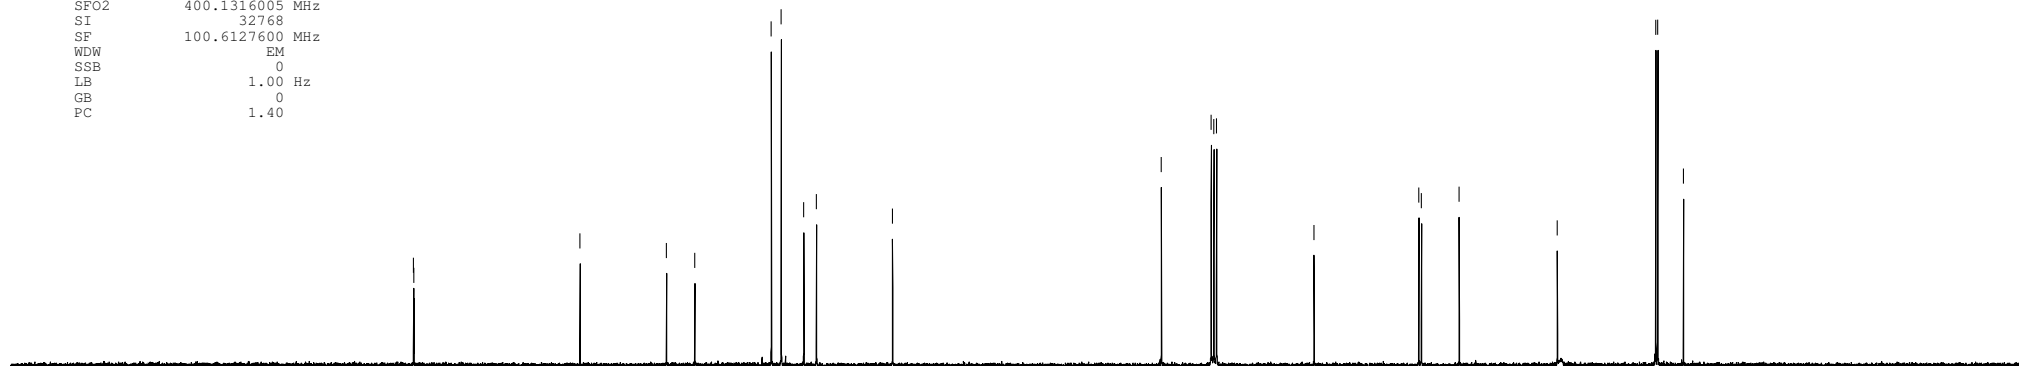

210 200 190 180 170 160 150 140 130 120 110 100 90 80 70 60 50 40 30 20 10 0 ppm

7.260  
5.755  
5.745  
5.736  
5.524  
3.779  
3.751  
3.695  
3.694  
3.668  
3.666  
3.643  
3.615  
3.557  
3.529  
3.137  
3.130  
3.127  
3.115  
3.108  
3.095  
3.086  
2.262  
2.246  
2.228  
2.134  
2.126  
2.114  
2.087  
2.073  
2.064  
2.042  
2.030  
2.007  
1.667  
1.655  
1.646  
1.640  
1.632  
1.586  
1.578  
1.570  
1.564  
1.546  
1.537  
1.511  
1.503  
1.428  
1.416  
1.348  
1.340  
1.308  
1.300  
1.245  
1.234  
0.676  
0.647  
0.636  
0.607

NAME TJ-20141208-F-1042-X-cy-B-rac-prod  
EXPNO 10  
PROCNO 1  
Date\_ 20141209  
Time 5.14  
INSTRUM spect  
PROBHD 5 mm PABBO BB-  
PULPROG zg30  
TD 65536  
SOLVENT CDCl3  
NS 16  
DS 2  
SWH 8223.685 Hz  
FIDRES 0.125483 Hz  
AQ 3.9846387 sec  
RG 144  
DW 60.800 usec  
DE 6.50 usec  
TE 298.2 K  
D1 1.00000000 sec  
TD0 1

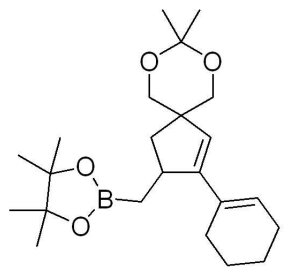

2m

----- CHANNEL f1 -----  
NUC1 1H  
P1 8.90 usec  
PL1 -4.00 dB  
PL1W 24.73352814 W  
SF01 400.1324710 MHz  
SI 32768  
SF 400.1300094 MHz  
WDW EM  
SSB 0  
LB 0.30 Hz  
GB 0  
PC 1.00

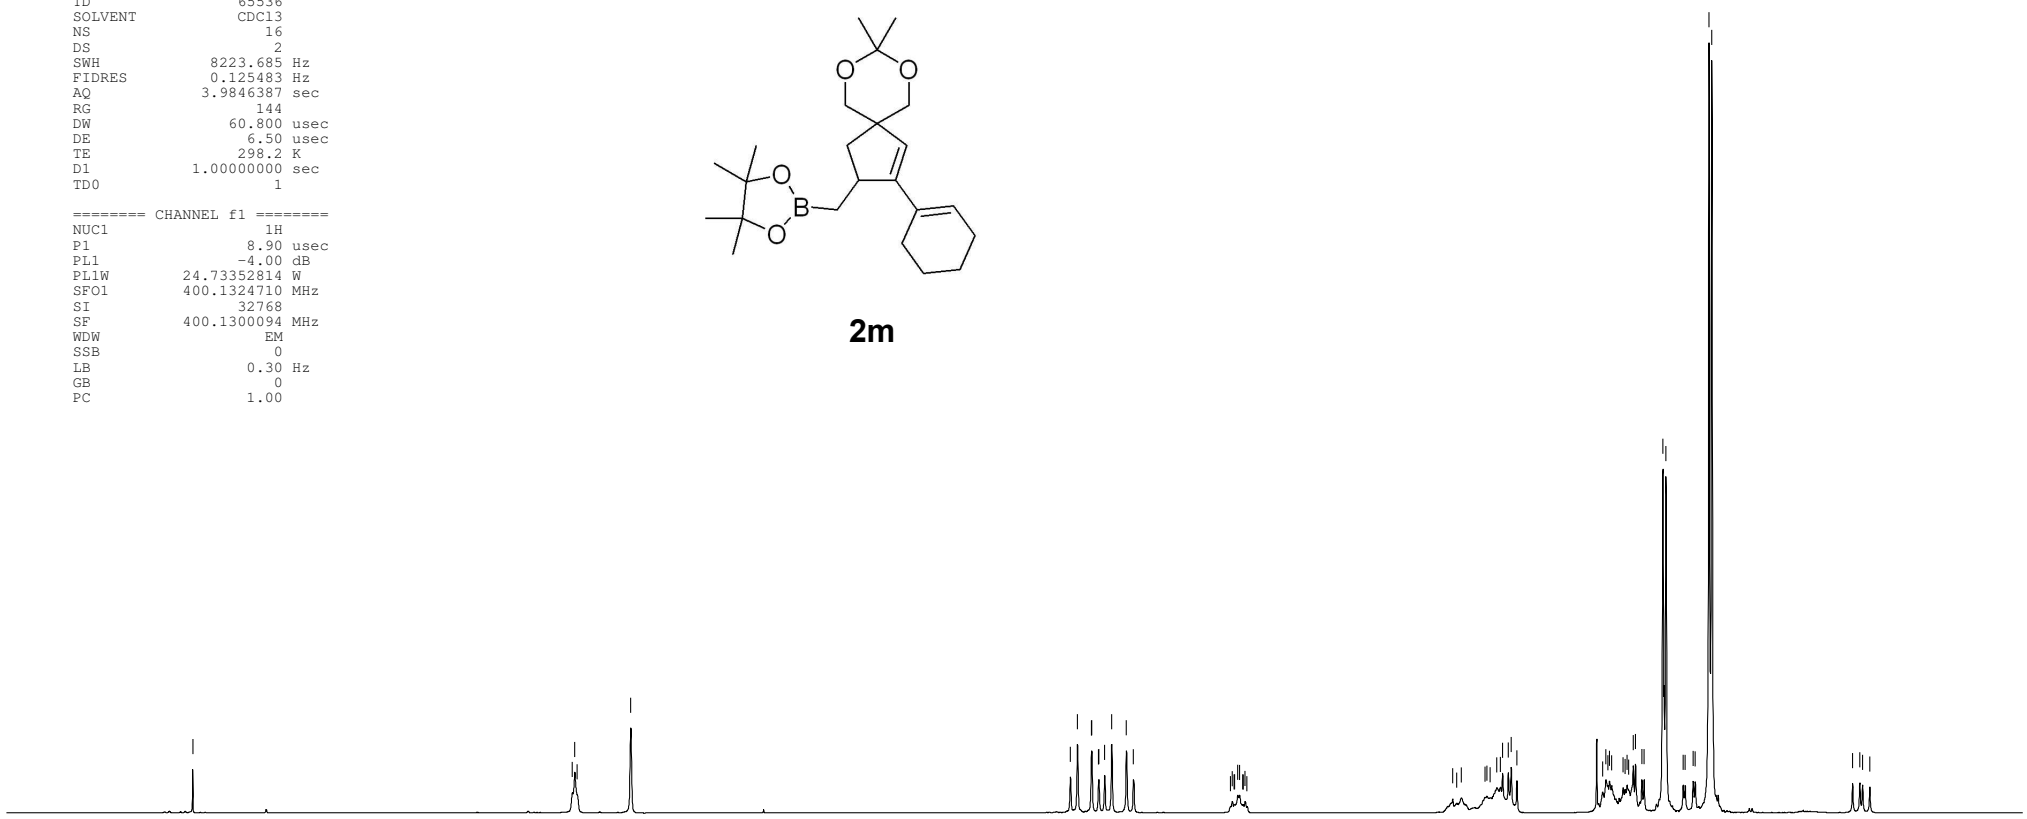

7.5 7.0 6.5 6.0 5.5 5.0 4.5 4.0 3.5 3.0 2.5 2.0 1.5 1.0 0.5 ppm

1.00 0.99 1.03 1.05 1.03 1.00 1.01 1.23 4.06 5.20 3.18 3.02 1.12 6.13 6.00 1.01

```

NAME      TJ-20141208-F-1042-X-cy-B-rac-prod
EXPNO     12
PROCNO    1
Date_     20141209
Time      6.04
INSTRUM   spect
PROBHD    5 mm PABBO BB-
PULPROG   zgpg30
TD        65536
SOLVENT   CDCl3
NS        768
DS        4
SWH       24038.461 Hz
FIDRES    0.366798 Hz
AQ        1.3631988 sec
RG        2050
DW        20.800 usec
DE        51.93 usec
TE        298.2 K
D1        2.0000000 sec
D11       0.0300000 sec
TD0       1

```

```

===== CHANNEL f1 =====
NUC1      13C
P1        6.43 usec
PL1       -3.00 dB
PL1W      69.66502380 W
SF01      100.6228298 MHz

```

```

===== CHANNEL f2 =====
CPDPRG2   waltz16
NUC2      1H
PCPD2     80.00 usec
PL2       16.00 dB
PL12      15.00 dB
PL13      15.00 dB
PL2W      0.24733528 W
PL12W     0.31137666 W
PL13W     0.31137666 W
SF02      400.1316005 MHz
SI        32768
SF        100.6127555 MHz
WDW       EM
SSB       0
LB        1.00 Hz
GB        0
PC        1.40

```

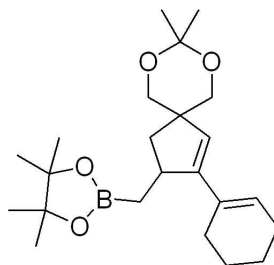

2m

— 151.587

— 132.193

— 125.908

— 124.660

— 97.535

— 83.109

— 77.478

— 77.160

— 76.843

— 69.833

— 69.560

— 47.955

— 40.083

— 38.945

— 26.691

— 25.825

— 25.126

— 24.815

— 24.370

— 23.641

— 22.903

— 22.446

— 20.095

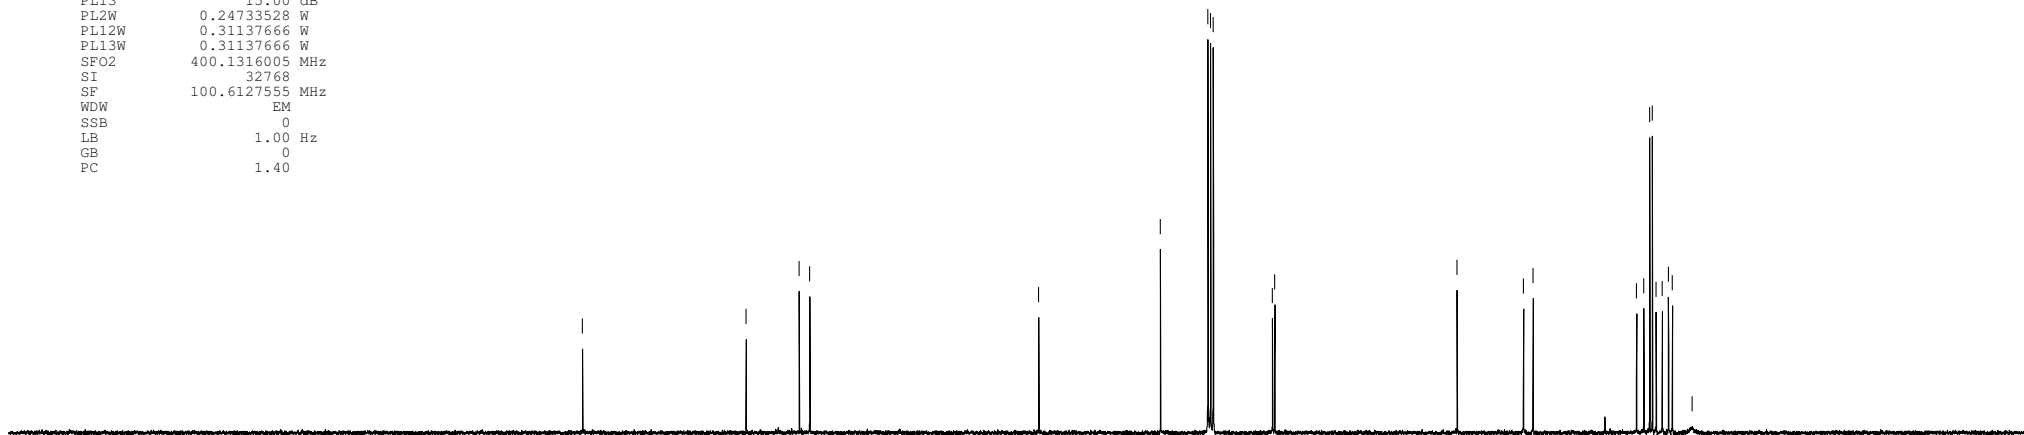

210 200 190 180 170 160 150 140 130 120 110 100 90 80 70 60 50 40 30 20 10 0 ppm
